# Supplementary material for: ThSCSP_12: Novel Effector in Tilletia horrida That Induces Cell Death and Defense Responses in Non-Host Plants
Source: MDPI journal article supplement (doi:10.3390/ijms232314752), 2022-11-25
Supplement: s1 [file s1]

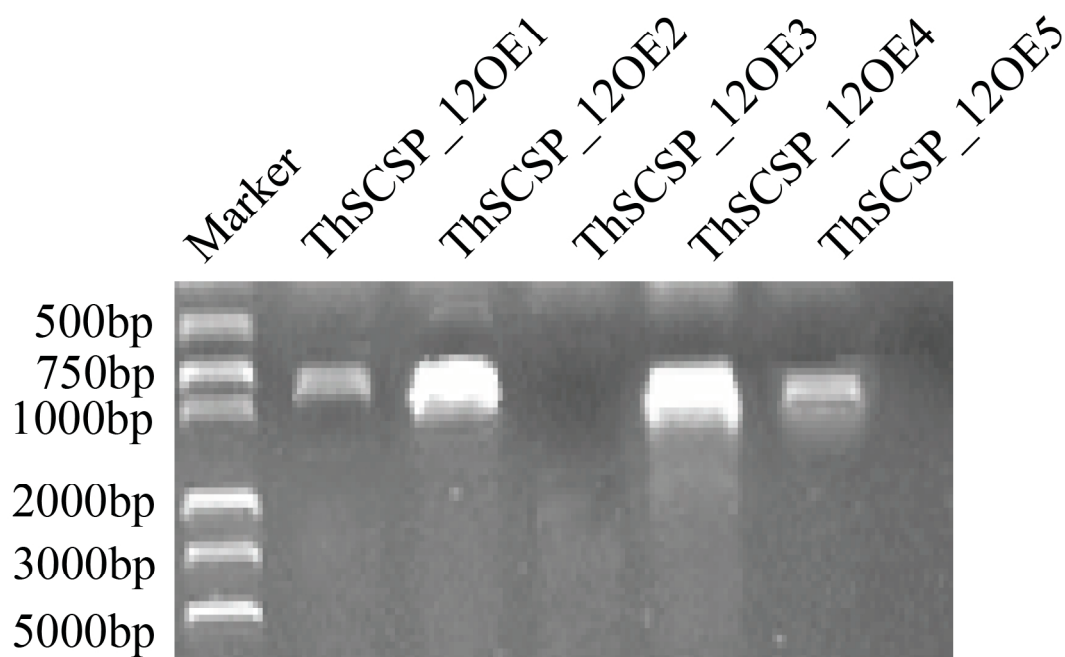

**Supplementary Figure S1** Verification of the ThSCSP\_12 transgenic lines by RT-PCR.

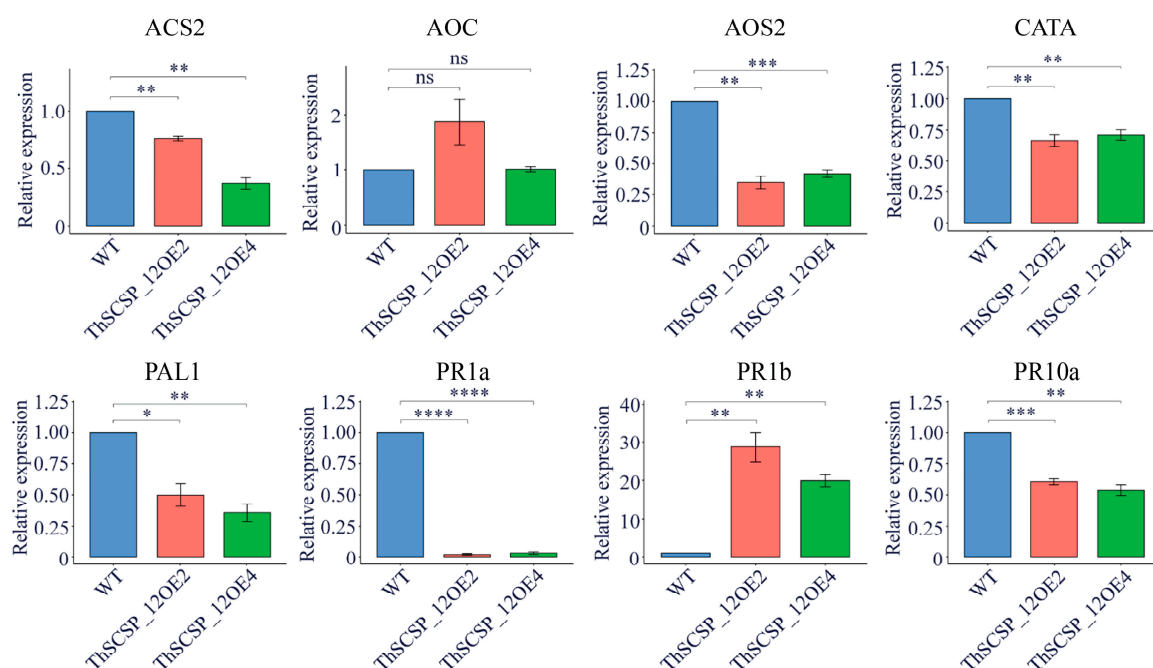

**Supplementary Figure S2** Expression analysis of seven PR-related genes in the ThSCSP\_12-OE2 and ThSCSP\_12-OE4 plants by qRT-PCR. Statistical analysis was performed by one-way ANOVA, followed by Tukey's multiple comparison test. Error bars are the standard deviation (SD) of four independent replicates (\*  $P < 0.05$ ; \*\*  $P < 0.01$ ; \*\*\*  $P < 0.001$ ; \*\*\*\*  $P < 0.0001$ ; 'ns' denotes non-significant differences between the means).
