# Supplementary material for: ThSCSP_12: Novel Effector in Tilletia horrida That Induces Cell Death and Defense Responses in Non-Host Plants
Source: Int J Mol Sci. 2022 Nov 25;23(23):14752. doi: 10.3390/ijms232314752 (PMC9736266; doi:10.3390/ijms232314752)
Supplement: Supplementary file 1 [file ijms-23-14752-s001.zip]

Archive with 6 entries (6 files):
- Supplementary Figures S1 and S2.pdf
- Supplementary Table S1.xlsx
- Supplementary Table S2.xlsx
- Supplementary Table S3.xlsx
- Supplementary Table S4.xlsx
- Supplementary Table S5.xlsx
