# Supplementary material for: ThSCSP_12: Novel Effector in Tilletia horrida That Induces Cell Death and Defense Responses in Non-Host Plants
Source: Int J Mol Sci. 2022 Nov 25;23(23):14752. doi: 10.3390/ijms232314752 (PMC9736266; doi:10.3390/ijms232314752)
Supplement: Supplementary file 1 [file ijms-23-14752-s001.zip › Supplementary Table S1.xlsx]

## Sheet: Sheet1
Supplementary Table S1 The DEGs in ThSCSP_12OE2 compared with WT.
gene_id	ThSCSP_12OE2	WT	log2FoldChange	padj
LOC_Os02g37230	12226.2	1.38778e-17	16.5782	3.32527e-59
LOC_Os03g02470	2209.31	1.38778e-17	14.11	4.43177e-41
LOC_Os04g14780	7315.07	34.9362	7.70497	1.64574e-37
LOC_Os12g31860	1399.56	1.38778e-17	13.4514	1.58229e-36
LOC_Os03g56930	3028.8	19.5242	7.26837	1.73448e-32
LOC_Os04g55710	760.119	51646.7	-6.08607	6.82911e-29
LOC_Os12g32770	0.970936	702.79	-9.32203	3.65778e-28
LOC_Os08g38170	8.75713	1074.73	-6.91866	1.7436e-26
LOC_Os11g02240	768.878	5.13966	7.19116	1.40687e-25
LOC_Os12g02200	1154.29	17.4693	6.03611	1.99134e-23
LOC_Os03g17200	2202.5	51.3757	5.41856	3.33636e-22
LOC_Os06g13250	307.55	1.38778e-17	11.2658	1.62971e-21
LOC_Os03g43100	306.577	1.38778e-17	11.2612	1.62971e-21
LOC_Os05g35470	5749.08	174.672	5.03963	3.66692e-21
LOC_Os05g03320	1.38778e-17	289.748	-11.1798	5.41695e-21
LOC_Os11g37950	1085.19	24.6615	5.45255	8.16006e-21
LOC_Os05g15770	4097.45	131.518	4.96009	1.85287e-20
LOC_Os04g14770	254.02	1.38778e-17	10.9901	7.73333e-20
LOC_Os03g63330	3924.21	137.683	4.83174	1.16386e-19
LOC_Os05g38290	516.802	10.277	5.63536	5.39601e-19
LOC_Os02g03670	818.515	21.5791	5.23735	5.47415e-19
LOC_Os03g18060	74.9393	2046.72	-4.76909	1.17656e-18
LOC_Os01g10110	15.57	608.263	-5.27641	1.79228e-18
LOC_Os09g19510	4.86405	358.589	-6.16727	2.12494e-18
LOC_Os02g52150	611.209	15.4143	5.29819	3.38683e-18
LOC_Os12g24020	1831.69	71.925	4.66818	5.55197e-18
LOC_Os04g27020	24.3294	753.136	-4.94485	1.07882e-17
LOC_Os04g28420	857.446	30.8263	4.7923	3.32381e-17
LOC_Os01g43090	1113.41	45.2109	4.61843	5.62652e-17
LOC_Os01g63180	55.474	1300.78	-4.54825	6.59796e-17
LOC_Os09g19500	3.89077	275.364	-6.09935	9.87018e-17
LOC_Os05g12630	474.952	13.3594	5.13906	1.27093e-16
LOC_Os06g16640	221.903	2.05729	6.67035	1.85163e-16
novel.611	191.731	1.02984	7.37923	3.42324e-16
LOC_Os06g38120	122.629	2322.08	-4.24162	7.42403e-16
LOC_Os06g39370	956.719	44.1834	4.43271	8.92898e-16
LOC_Os04g39320	215.09	3839.65	-4.15716	1.20992e-15
LOC_Os01g59510	557.68	21.5791	4.68388	1.56412e-15
LOC_Os01g58280	99.271	1850.47	-4.21863	1.57197e-15
LOC_Os10g09240	615.102	25.689	4.57503	2.20691e-15
LOC_Os03g18779	211.197	3.08475	6.04193	3.30676e-15
LOC_Os06g08620	7.78386	296.94	-5.23075	4.50174e-15
LOC_Os03g60260	345.507	11.3045	4.91872	4.95474e-15
LOC_Os06g14240	764.985	36.9911	4.36564	5.05989e-15
LOC_Os03g51920	4297.94	263.034	4.0297	5.68132e-15
LOC_Os04g11970	14.5967	392.495	-4.73689	5.68132e-15
LOC_Os03g54130	420.449	6605.59	-3.97328	8.85392e-15
LOC_Os04g58200	3792.82	248.649	3.93042	2.64067e-14
LOC_Os06g12370	2174.28	138.71	3.9692	3.11527e-14
LOC_Os06g38580	20.4363	449.006	-4.44897	3.25724e-14
LOC_Os05g47540	1701.27	108.914	3.96383	4.9633e-14
LOC_Os09g26660	537.241	7591.96	-3.82051	7.0464e-14
LOC_Os12g07640	5.83732	227.073	-5.25138	7.0464e-14
LOC_Os05g19910	221.903	3233.44	-3.8643	7.0464e-14
LOC_Os11g32880	400.01	17.4693	4.50751	8.0441e-14
LOC_Os06g08610	37.9551	665.801	-4.12816	1.26395e-13
LOC_Os11g45510	0.970936	139.738	-6.99268	1.38216e-13
LOC_Os03g30950	136.255	1.02984	6.88684	1.79576e-13
LOC_Os01g11160	444.781	6023.02	-3.75894	1.79576e-13
LOC_Os03g60580	1692.51	119.189	3.82647	2.62732e-13
LOC_Os06g47910	397.091	19.5242	4.33756	3.56169e-13
LOC_Os08g40910	130.415	1.02984	6.82371	4.01253e-13
LOC_Os03g63950	4604.52	354.479	3.69882	4.82893e-13
LOC_Os04g22120	36.9819	593.879	-4.00062	7.7516e-13
LOC_Os07g32710	106.084	1.38778e-17	9.73132	1.1354e-12
LOC_Os03g18130	1150.4	84.2547	3.76929	1.14298e-12
LOC_Os01g03390	714.375	48.2933	3.88339	1.15357e-12
LOC_Os08g10310	10.7037	256.869	-4.5685	1.51172e-12
LOC_Os09g36680	61567.9	5211.32	3.56243	1.64271e-12
LOC_Os01g03950	103.164	1.38778e-17	9.6911	1.79377e-12
LOC_Os07g34850	48.6611	698.68	-3.84028	1.80029e-12
LOC_Os01g68460	3.89077	163.37	-5.34659	1.97961e-12
LOC_Os02g12890	109.004	1394.28	-3.67551	2.45478e-12
LOC_Os04g01874	1.38778e-17	100.694	-9.65612	2.92052e-12
LOC_Os02g52010	155.72	4.1122	5.20169	4.45851e-12
LOC_Os11g28540	0.970936	113.024	-6.68688	5.37401e-12
LOC_Os01g63190	153.774	4.1122	5.18356	5.57078e-12
LOC_Os03g13030	609.263	44.1834	3.78179	6.23667e-12
LOC_Os03g05290	20207	1866.91	3.43604	9.56348e-12
LOC_Os11g09180	19.4631	322.627	-4.04221	9.90996e-12
LOC_Os05g39540	92.4581	1.38778e-17	9.53324	9.93824e-12
novel.370	657.926	49.3207	3.73435	1.05412e-11
LOC_Os05g32770	206.33	9.24952	4.46132	1.1562e-11
LOC_Os09g23460	1.94421	121.243	-5.87256	1.3118e-11
LOC_Os11g46000	116.79	1361.4	-3.54166	1.32652e-11
LOC_Os04g29790	105.111	1214.47	-3.52875	1.81404e-11
LOC_Os12g35330	105.111	1.02984	6.51284	1.81404e-11
LOC_Os06g04510	1739.23	156.177	3.47616	1.91611e-11
LOC_Os12g11860	14.5967	254.814	-4.1139	2.07501e-11
LOC_Os06g18670	475.925	5027.4	-3.40066	2.16377e-11
LOC_Os08g09270	380.545	25.689	3.88246	2.24233e-11
LOC_Os04g03830	26.2759	375.028	-3.82869	3.04905e-11
LOC_Os04g29770	342.588	3580.73	-3.38522	3.04987e-11
LOC_Os01g07170	902.216	78.0898	3.52821	3.20384e-11
LOC_Os02g43330	258.887	14.3869	4.15796	3.21024e-11
LOC_Os04g51280	668.632	54.4581	3.61502	3.21024e-11
LOC_Os08g37700	522.642	41.101	3.66463	3.66267e-11
LOC_Os04g05010	1138.72	102.749	3.46866	4.15995e-11
LOC_Os05g28740	1062.8	95.5568	3.4737	4.63803e-11
LOC_Os05g02070	3232.22	315.435	3.35661	4.80084e-11
LOC_Os05g35290	185.892	1948.08	-3.38862	4.84608e-11
LOC_Os06g44230	817.542	71.925	3.50449	5.34172e-11
LOC_Os07g04990	9387.15	953.492	3.29923	5.65473e-11
LOC_Os01g65460	82.7254	1.38778e-17	9.373	5.7641e-11
LOC_Os03g12890	84.672	929.861	-3.45508	5.92474e-11
LOC_Os03g06970	249.154	14.3869	4.1027	6.28878e-11
LOC_Os02g41630	2295.93	22319.7	-3.28109	6.44918e-11
LOC_Os04g34600	1079.35	99.6667	3.4353	6.48305e-11
LOC_Os04g43860	81.7522	1.38778e-17	9.35596	6.78467e-11
LOC_Os08g35210	653.06	6412.43	-3.29533	6.93159e-11
LOC_Os04g54759	221.903	12.3319	4.15601	1.06284e-10
LOC_Os03g08460	21.4096	300.023	-3.80079	1.08131e-10
LOC_Os01g60850	290.031	19.5242	3.88447	1.08131e-10
LOC_Os05g04930	1.94421	105.831	-5.67663	1.08131e-10
LOC_Os09g21230	1011.22	95.5568	3.40193	1.08131e-10
LOC_Os07g05850	12.6502	211.661	-4.05092	1.11752e-10
LOC_Os11g06980	1718.79	172.617	3.31483	1.33215e-10
LOC_Os04g32850	371.786	28.7714	3.68612	1.3503e-10
LOC_Os03g49430	256.94	16.4418	3.95599	1.38354e-10
LOC_Os05g07890	265.7	17.4693	3.9175	1.43619e-10
LOC_Os03g30740	124.576	4.1122	4.88005	1.78341e-10
LOC_Os03g18030	10.7037	194.194	-4.16518	2.0938e-10
LOC_Os11g07680	1.38778e-17	76.0349	-9.25145	2.18492e-10
LOC_Os11g31790	75.9126	1.38778e-17	9.24921	2.18492e-10
LOC_Os04g29810	241.368	2284.06	-3.24161	2.27e-10
LOC_Os02g46030	225.796	2120.7	-3.23072	2.93889e-10
LOC_Os09g15980	18.4898	253.787	-3.76962	3.30597e-10
LOC_Os01g36720	238.448	2204.95	-3.20831	3.53495e-10
LOC_Os03g17140	241.368	16.4418	3.86583	4.03519e-10
LOC_Os04g18770	139.175	6.16713	4.46907	4.03519e-10
LOC_Os06g15390	139.175	6.16713	4.46907	4.03519e-10
LOC_Os01g47190	157.667	8.22206	4.24104	4.17637e-10
LOC_Os08g33150	352.32	3174.88	-3.17128	4.31061e-10
LOC_Os04g30010	44.768	489.077	-3.44579	4.44351e-10
LOC_Os04g30240	397.091	3557.1	-3.16275	4.51956e-10
LOC_Os01g56330	247.207	17.4693	3.81348	5.25425e-10
LOC_Os02g06950	1.94421	96.5843	-5.54488	5.25425e-10
LOC_Os09g30458	498.31	47.2658	3.3948	5.79665e-10
LOC_Os04g27540	0.970936	84.2547	-6.26362	5.83849e-10
LOC_Os04g30040	40.8749	445.923	-3.44342	5.95943e-10
LOC_Os03g14915	541.134	4670.87	-3.10933	7.79681e-10
LOC_Os07g04980	160.587	9.24952	4.09997	8.07506e-10
LOC_Os08g43334	120.683	5.13966	4.5209	1.18098e-09
LOC_Os02g49790	68.1264	1.38778e-17	9.09336	1.18098e-09
novel.91	68.1264	1.38778e-17	9.09336	1.18098e-09
LOC_Os04g58390	403.903	3429.69	-3.08559	1.21399e-09
LOC_Os11g44800	657.926	68.8426	3.25426	1.34444e-09
LOC_Os09g09510	171.293	1492.91	-3.12264	1.40586e-09
LOC_Os09g35790	1736.31	200.359	3.11459	1.425e-09
LOC_Os01g21990	514.856	51.3757	3.32193	1.45508e-09
LOC_Os11g45990	177.132	1535.04	-3.11446	1.50976e-09
LOC_Os07g42040	131.389	1150.77	-3.12944	1.76633e-09
LOC_Os03g10110	32.1155	346.259	-3.42532	1.76633e-09
LOC_Os06g05420	97.3244	3.08475	4.92523	2.06651e-09
LOC_Os09g23540	349.4	32.8813	3.4047	2.18824e-09
LOC_Os04g30160	31.1423	332.902	-3.4128	2.25933e-09
LOC_Os02g06770	65.2066	1.38778e-17	9.03029	2.25933e-09
LOC_Os10g17690	2.91749	97.6117	-5.00447	2.4036e-09
LOC_Os03g15960	410.716	41.101	3.31704	2.53214e-09
LOC_Os05g06780	809.756	91.4469	3.14477	2.97078e-09
LOC_Os04g49194	73.966	667.856	-3.17239	2.97078e-09
LOC_Os04g29580	25.3027	279.474	-3.45875	3.10694e-09
LOC_Os04g10750	255.967	2091.93	-3.03017	3.108e-09
LOC_Os01g49750	94.4046	3.08475	4.88134	3.30995e-09
LOC_Os03g22634	8545.28	66647.7	-2.96334	3.32681e-09
LOC_Os08g34280	653.06	5171.25	-2.98498	3.3911e-09
LOC_Os03g12110	43.7947	426.401	-3.27961	3.58859e-09
LOC_Os03g48780	440.888	46.2383	3.24984	3.67024e-09
LOC_Os09g23550	3146.57	397.632	2.98389	4.23605e-09
LOC_Os02g41680	906.109	7018.63	-2.95326	4.23605e-09
LOC_Os10g41550	213.143	1721.01	-3.0126	4.34713e-09
LOC_Os02g42585	168.373	12.3319	3.758	4.73268e-09
LOC_Os09g29710	136.255	8.22206	4.03065	4.83634e-09
LOC_Os03g16020	158.64	11.3045	3.79638	5.73356e-09
LOC_Os02g26670	36.9819	361.671	-3.28532	5.73356e-09
LOC_Os09g10274	11.6769	167.48	-3.82767	5.73356e-09
LOC_Os01g04630	2100.31	268.171	2.9688	6.16808e-09
LOC_Os06g16040	59.367	1.38778e-17	8.89521	7.04803e-09
LOC_Os01g04590	250.127	22.6066	3.46077	7.1843e-09
LOC_Os07g03900	177.132	1399.41	-2.98101	7.65378e-09
LOC_Os06g18960	6.81059	124.326	-4.16492	7.66601e-09
LOC_Os06g12320	129.442	1036.72	-3.0004	8.4251e-09
LOC_Os07g05360	70081	9493.8	2.88395	8.72929e-09
LOC_Os10g02400	8.75713	139.738	-3.97658	8.81255e-09
LOC_Os06g39240	245.261	22.6066	3.43244	9.3492e-09
LOC_Os08g34790	92.4581	755.191	-3.02822	9.80827e-09
LOC_Os06g14670	138.202	9.24952	3.88358	9.84695e-09
novel.502	18.4898	207.551	-3.47962	1.01787e-08
LOC_Os03g03980	221.903	19.5242	3.49838	1.02108e-08
LOC_Os04g43650	617.049	4585.59	-2.89339	1.03131e-08
LOC_Os09g23440	2.91749	88.3645	-4.86107	1.03131e-08
LOC_Os06g45710	619.969	73.98	3.06489	1.03131e-08
LOC_Os07g26100	57.4205	1.38778e-17	8.84722	1.09755e-08
novel.455	227.742	20.5517	3.4623	1.12317e-08
LOC_Os03g55090	181.999	14.3869	3.64987	1.2172e-08
LOC_Os05g38680	4072.15	553.807	2.87806	1.28427e-08
LOC_Os09g29560	246.234	1850.47	-2.90914	1.31581e-08
LOC_Os04g49490	1.38778e-17	57.5405	-8.85011	1.39596e-08
LOC_Os05g03750	724.108	89.392	3.01626	1.39596e-08
LOC_Os03g14910	343.561	2537.85	-2.8845	1.39596e-08
LOC_Os10g18340	4008.88	548.67	2.86891	1.42344e-08
LOC_Os04g48390	857.446	6208.99	-2.85606	1.43407e-08
LOC_Os04g39300	19.4631	208.578	-3.41323	1.65289e-08
LOC_Os09g28690	846.74	108.914	2.95732	1.83446e-08
LOC_Os01g52010	350.374	2533.74	-2.85385	2.05073e-08
LOC_Os10g02300	12.6502	154.122	-3.59356	2.07123e-08
LOC_Os01g70490	131.389	993.564	-2.91755	2.16239e-08
LOC_Os11g46900	618.022	4371.88	-2.82227	2.40871e-08
LOC_Os01g41710	263095	37950.5	2.79339	2.51169e-08
LOC_Os07g26630	539.187	66.7877	3.01083	2.57002e-08
LOC_Os04g31760	1.94421	73.98	-5.16079	2.64867e-08
LOC_Os05g47850	335.775	38.0186	3.13862	2.64867e-08
LOC_Os10g34700	6.81059	114.051	-4.04061	2.7737e-08
novel.758	538.214	3764.64	-2.80597	3.03517e-08
LOC_Os04g30030	352.32	2487.5	-2.81929	3.0675e-08
LOC_Os04g40630	170.319	14.3869	3.55425	3.32395e-08
LOC_Os01g44430	316.309	35.9637	3.13239	3.44245e-08
novel.404	8.75713	127.408	-3.84344	3.57126e-08
LOC_Os12g11510	3.89077	89.392	-4.47757	3.58336e-08
LOC_Os04g33310	295.871	2079.6	-2.81273	3.73167e-08
LOC_Os01g03320	615.102	80.1448	2.93824	3.74555e-08
LOC_Os03g43430	563.519	72.9525	2.94734	4.15913e-08
LOC_Os04g04060	110.95	7.19459	3.92412	4.15913e-08
LOC_Os06g30480	223.849	22.6066	3.30072	4.19835e-08
LOC_Os01g13690	23510.2	3494.42	2.75012	4.26797e-08
LOC_Os01g34080	1132.88	158.232	2.83892	4.37034e-08
LOC_Os12g13860	5.83732	102.749	-4.10829	4.43476e-08
LOC_Os11g35540	51.5809	1.38778e-17	8.69285	4.79506e-08
novel.580	21.4096	208.578	-3.27656	4.94297e-08
LOC_Os03g25150	173.239	1218.58	-2.81345	5.44321e-08
LOC_Os01g43120	970.345	135.628	2.83773	5.61147e-08
LOC_Os10g35950	240.395	1654.23	-2.78202	5.8646e-08
LOC_Os11g46950	10.7037	137.683	-3.66941	5.8646e-08
LOC_Os08g39550	85.6452	4.1122	4.34014	5.8646e-08
LOC_Os04g41380	0.970936	61.6504	-5.81374	6.05722e-08
LOC_Os09g13440	1987.41	13110.5	-2.72168	6.05722e-08
LOC_Os09g37330	17.5165	177.754	-3.33365	6.0838e-08
novel.69	3801.58	569.219	2.73928	6.32582e-08
LOC_Os06g12455	92.4581	5.13966	4.13702	6.41471e-08
novel.234	24.3294	223.99	-3.19593	6.71e-08
LOC_Os07g29330	763.039	105.831	2.84856	6.746e-08
LOC_Os03g21960	182.972	17.4693	3.37964	7.07956e-08
LOC_Os10g04540	134.309	11.3045	3.55639	7.24312e-08
LOC_Os11g35890	127.496	893.899	-2.80842	7.58059e-08
LOC_Os06g03800	193.678	1322.35	-2.77056	7.58059e-08
LOC_Os08g34240	1630.22	240.43	2.76076	7.81433e-08
LOC_Os01g61940	49.6343	1.38778e-17	8.63749	7.81433e-08
LOC_Os04g44100	99.271	6.16713	3.98214	7.81433e-08
LOC_Os02g21920	378.598	48.2933	2.9676	7.81433e-08
LOC_Os04g51660	83.6987	4.1122	4.30702	8.02258e-08
LOC_Os09g19229	58.3938	441.813	-2.91681	8.45192e-08
LOC_Os02g16940	4.86405	91.4469	-4.19738	8.66857e-08
LOC_Os03g39690	41.8482	337.012	-3.00571	8.94094e-08
LOC_Os05g43930	58.3938	1.02984	5.66621	9.31386e-08
LOC_Os01g02780	1136.77	7317.63	-2.68629	9.32174e-08
LOC_Os05g40010	1597.13	238.375	2.74355	9.44166e-08
LOC_Os02g11110	412.663	53.4306	2.94636	9.44166e-08
novel.2	296.844	1961.44	-2.72361	1.00044e-07
LOC_Os01g02080	723.135	102.749	2.81367	1.04157e-07
LOC_Os09g23450	5.83732	97.6117	-4.03438	1.04157e-07
LOC_Os01g18584	479.818	3114.26	-2.698	1.0636e-07
LOC_Os04g29780	10.7037	131.518	-3.60338	1.1177e-07
LOC_Os03g08490	75.9126	547.643	-2.84873	1.17193e-07
LOC_Os02g37700	291.004	1901.85	-2.70775	1.19375e-07
LOC_Os08g34500	137.228	12.3319	3.46317	1.20769e-07
LOC_Os02g41650	3031.72	19115	-2.65644	1.21589e-07
LOC_Os01g33869	1.38778e-17	48.2933	-8.59794	1.30308e-07
LOC_Os03g29410	15.57	156.177	-3.31574	1.30953e-07
LOC_Os12g24320	377.625	2428.94	-2.68488	1.30953e-07
LOC_Os05g49370	912.922	134.601	2.76069	1.30986e-07
LOC_Os03g63720	135.282	12.3319	3.44258	1.33621e-07
LOC_Os03g12990	1897.87	292.831	2.69573	1.35896e-07
LOC_Os06g39875	128.469	11.3045	3.49232	1.38375e-07
LOC_Os08g04400	128.469	11.3045	3.49232	1.38375e-07
LOC_Os03g31690	3220.54	506.544	2.66825	1.45086e-07
LOC_Os10g42900	812.675	120.216	2.7558	1.46303e-07
LOC_Os01g16714	49.6343	369.891	-2.89447	1.46591e-07
LOC_Os04g10800	8.75713	115.079	-3.69675	1.48766e-07
LOC_Os02g13430	252.074	1630.59	-2.69286	1.51297e-07
LOC_Os06g47130	480.791	66.7877	2.84549	1.53538e-07
LOC_Os07g43950	1656.5	256.869	2.68845	1.56982e-07
LOC_Os03g35600	21.4096	192.139	-3.15819	1.62314e-07
LOC_Os11g36000	103.164	701.763	-2.76452	1.62794e-07
LOC_Os11g28530	62.2868	445.923	-2.83725	1.76629e-07
LOC_Os08g33390	882.751	132.546	2.73439	1.76947e-07
LOC_Os03g27770	438.941	60.6229	2.85359	1.8135e-07
LOC_Os02g15860	4765.11	766.493	2.63597	1.83461e-07
LOC_Os01g35330	1340.19	207.551	2.69018	1.83929e-07
LOC_Os11g37960	284.192	35.9637	2.97799	1.83929e-07
LOC_Os01g18230	92.4581	6.16713	3.87971	1.84494e-07
LOC_Os07g24830	64.2334	2.05729	4.88385	1.84494e-07
LOC_Os03g15460	526.535	76.0349	2.78982	2.05986e-07
LOC_Os07g23640	99.271	7.19459	3.76385	2.08885e-07
LOC_Os05g28520	91.4848	6.16713	3.86446	2.16489e-07
LOC_Os01g42410	43.7947	329.819	-2.9092	2.17438e-07
LOC_Os07g37730	3.89077	78.0898	-4.28284	2.1901e-07
LOC_Os08g08690	0.970936	55.4856	-5.66206	2.24921e-07
LOC_Os04g41860	34.0621	268.171	-2.9722	2.24921e-07
LOC_Os03g55590	6938.42	1142.55	2.60223	2.33271e-07
LOC_Os01g68650	155.72	15.4143	3.32636	2.35386e-07
LOC_Os07g05840	52.5542	375.028	-2.83211	2.55641e-07
LOC_Os04g02580	3.89077	77.0624	-4.26376	2.62401e-07
LOC_Os02g33070	1582.53	253.787	2.63996	2.71609e-07
LOC_Os10g38940	1234.1	196.249	2.65195	2.79417e-07
novel.791	1.38778e-17	45.2109	-8.50304	2.82007e-07
LOC_Os02g08490	772.771	119.189	2.69555	2.84705e-07
LOC_Os11g13670	1008.3	159.26	2.66155	2.97359e-07
LOC_Os04g38220	84.672	562.027	-2.72883	3.00957e-07
novel.602	1021.93	6100.08	-2.57738	3.11545e-07
LOC_Os01g12900	369.839	51.3757	2.8448	3.13706e-07
LOC_Os03g03320	1343.11	215.771	2.63732	3.13706e-07
LOC_Os03g22230	158.64	16.4418	3.26075	3.18958e-07
LOC_Os10g05130	2056.51	338.039	2.6045	3.35956e-07
LOC_Os07g48460	398.064	56.513	2.81368	3.35962e-07
LOC_Os03g52640	537.241	81.1722	2.72467	3.71508e-07
LOC_Os12g05210	74.9393	4.1122	4.14779	3.7651e-07
LOC_Os12g09720	17.5165	157.205	-3.15654	3.87989e-07
LOC_Os03g03060	22.3829	187.001	-3.05535	3.9365e-07
LOC_Os03g59180	158.64	985.344	-2.63389	3.95743e-07
LOC_Os03g21060	190.758	1175.43	-2.62256	4.11499e-07
LOC_Os04g22080	46.7145	333.929	-2.83421	4.16938e-07
LOC_Os11g47630	16.5433	150.013	-3.17089	4.22617e-07
LOC_Os05g42110	161.56	17.4693	3.20022	4.24968e-07
LOC_Os09g20000	118.736	11.3045	3.37877	4.42946e-07
LOC_Os02g52930	2.91749	66.7877	-4.45783	4.57161e-07
LOC_Os05g49610	1102.71	179.809	2.6157	4.58563e-07
LOC_Os02g01220	237.475	30.8263	2.94058	4.64377e-07
LOC_Os01g46760	86.6185	6.16713	3.78572	4.68916e-07
LOC_Os01g04070	54.5007	371.946	-2.76786	4.68916e-07
LOC_Os03g60910	423.369	62.6778	2.7535	4.72789e-07
LOC_Os01g63620	822.408	131.518	2.64347	4.7296e-07
LOC_Os12g13910	405.85	59.5954	2.76516	4.81247e-07
LOC_Os05g20020	42.8215	1.38778e-17	8.42507	4.81247e-07
LOC_Os08g32960	820.462	131.518	2.64005	4.8931e-07
LOC_Os04g46280	1188.36	196.249	2.59747	4.92242e-07
LOC_Os02g50340	11.6769	124.326	-3.39818	4.97353e-07
LOC_Os02g36110	4.86405	80.1448	-4.00733	4.98052e-07
LOC_Os06g09820	99.271	8.22206	3.57429	5.17309e-07
LOC_Os11g31740	58.3938	2.05729	4.74663	5.28214e-07
LOC_Os02g20210	1.94421	59.5954	-4.84943	5.28214e-07
novel.63	182.972	21.5791	3.07674	5.28214e-07
LOC_Os08g44270	66.1799	3.08475	4.36971	5.44095e-07
LOC_Os11g47220	13.6235	129.463	-3.23633	5.58052e-07
LOC_Os08g39840	114.843	716.147	-2.63924	5.64194e-07
LOC_Os09g27330	50.6076	1.02984	5.46024	5.73739e-07
LOC_Os04g09900	230.662	1365.51	-2.56492	6.13951e-07
LOC_Os06g44260	1533.87	259.952	2.5603	6.19583e-07
LOC_Os04g03920	10.7037	116.106	-3.42374	6.19583e-07
LOC_Os01g51610	10.7037	116.106	-3.42374	6.19583e-07
LOC_Os07g48450	10.7037	116.106	-3.42374	6.19583e-07
LOC_Os12g32790	81.7522	524.011	-2.67836	6.20288e-07
novel.477	41.8482	1.38778e-17	8.392	6.25148e-07
LOC_Os03g04720	67.1532	438.731	-2.70548	6.34514e-07
LOC_Os01g53370	46.7145	324.682	-2.79371	6.39017e-07
LOC_Os09g10340	2374.77	13388.9	-2.49512	7.00004e-07
LOC_Os01g40290	10.7037	115.079	-3.41093	7.00004e-07
LOC_Os11g46870	200.491	1183.65	-2.56086	7.08904e-07
LOC_Os10g36848	86.6185	541.478	-2.64237	7.30482e-07
LOC_Os04g30250	554.76	3154.33	-2.50712	7.99684e-07
LOC_Os11g39450	9.7304	107.886	-3.45377	7.99684e-07
LOC_Os10g28680	194.651	24.6615	2.97434	8.02569e-07
LOC_Os07g42960	550.867	3129.67	-2.50596	8.05271e-07
LOC_Os07g08150	13732.8	2461.81	2.47977	8.27754e-07
LOC_Os01g12520	23.3561	182.892	-2.96225	8.38861e-07
LOC_Os03g49440	628.728	102.749	2.61188	8.81296e-07
LOC_Os01g18744	184.918	1081.93	-2.54781	9.0495e-07
LOC_Os04g29800	77.8591	489.077	-2.64913	9.11578e-07
LOC_Os08g06100	3680.89	20346.9	-2.46664	9.40051e-07
LOC_Os10g42960	544.054	3055.69	-2.4894	9.65747e-07
LOC_Os01g05080	960.612	163.37	2.55492	9.76013e-07
LOC_Os08g39860	208.277	27.7439	2.90278	9.96995e-07
LOC_Os12g36940	181.025	1052.13	-2.5382	1.01403e-06
novel.66	87.5918	7.19459	3.58352	1.05228e-06
LOC_Os04g48460	91.4848	554.835	-2.59877	1.08002e-06
LOC_Os02g09490	569.359	3168.71	-2.47622	1.08853e-06
LOC_Os09g29840	4101.34	739.779	2.47074	1.08853e-06
LOC_Os02g53850	57.4205	366.808	-2.67268	1.13677e-06
LOC_Os03g03724	361.08	55.4856	2.69946	1.16156e-06
LOC_Os08g27150	856.472	146.93	2.54229	1.17388e-06
LOC_Os02g30190	4.86405	75.0074	-3.91191	1.17974e-06
LOC_Os09g31080	266.673	39.0461	2.76798	1.20046e-06
LOC_Os06g38160	0.970936	48.2933	-5.46224	1.20633e-06
LOC_Os07g30600	2.91749	62.6778	-4.36638	1.21523e-06
LOC_Os08g15710	19.4631	156.177	-2.99611	1.21523e-06
LOC_Os06g34070	86.6185	7.19459	3.56742	1.21523e-06
LOC_Os11g12340	405.85	2256.32	-2.47458	1.24609e-06
LOC_Os12g02530	618.995	3408.11	-2.46073	1.25112e-06
LOC_Os10g35070	1528.03	272.281	2.48797	1.27332e-06
LOC_Os08g33740	22.3829	172.617	-2.93995	1.293e-06
LOC_Os02g42150	121.656	709.982	-2.54372	1.30041e-06
LOC_Os04g10530	32.1155	227.073	-2.81689	1.30152e-06
LOC_Os01g07280	378.598	2096.04	-2.46852	1.31551e-06
LOC_Os02g03710	2363.09	427.429	2.46658	1.33826e-06
LOC_Os01g16340	236.502	33.9087	2.79769	1.38182e-06
LOC_Os07g49310	66.1799	409.962	-2.62869	1.40889e-06
novel.362	6.81059	86.3096	-3.63902	1.40997e-06
LOC_Os02g07360	940.173	164.397	2.51486	1.47391e-06
LOC_Os02g39660	57.4205	360.643	-2.64823	1.49309e-06
LOC_Os01g08700	7144.75	1328.52	2.42696	1.50588e-06
LOC_Os08g41960	103.164	10.277	3.31211	1.51701e-06
LOC_Os07g01340	169.346	21.5791	2.96517	1.51828e-06
LOC_Os06g10790	12.6502	120.216	-3.23543	1.52113e-06
LOC_Os08g14950	0.970936	47.2658	-5.4313	1.52144e-06
novel.443	0.970936	47.2658	-5.4313	1.52144e-06
LOC_Os02g32860	261.806	39.0461	2.74143	1.54989e-06
LOC_Os06g47970	4889.69	909.311	2.42674	1.55647e-06
LOC_Os08g36480	291.004	1604.91	-2.46286	1.60036e-06
LOC_Os03g15340	6.81059	85.2821	-3.62176	1.63511e-06
LOC_Os09g09490	163.507	922.668	-2.49553	1.63838e-06
LOC_Os08g13870	16.5433	136.656	-3.03647	1.63838e-06
LOC_Os01g68470	10.7037	107.886	-3.31793	1.63854e-06
LOC_Os03g03810	325.069	50.3482	2.68779	1.65576e-06
LOC_Os12g12130	142.095	809.647	-2.50937	1.66847e-06
LOC_Os01g62430	56.4472	351.396	-2.63538	1.70629e-06
LOC_Os03g57950	11.6769	113.024	-3.26082	1.77573e-06
LOC_Os09g19400	86.6185	509.626	-2.55492	1.79301e-06
LOC_Os12g06250	128.469	14.3869	3.14778	1.92415e-06
LOC_Os03g22650	5.83732	78.0898	-3.71291	1.95616e-06
LOC_Os02g38494	52.5542	2.05729	4.59497	1.97872e-06
LOC_Os09g04320	1.94421	53.4306	-4.69224	1.97872e-06
LOC_Os06g22960	4970.47	940.135	2.40229	2.00683e-06
LOC_Os05g11320	1945.56	10231.5	-2.39469	2.02923e-06
LOC_Os09g17560	1919.28	355.506	2.43222	2.03043e-06
LOC_Os10g10130	1944.58	10206.9	-2.39193	2.08789e-06
LOC_Os07g48610	241.368	1315.16	-2.44531	2.08912e-06
LOC_Os06g38340	760.119	4027.68	-2.40545	2.09526e-06
LOC_Os12g44230	56.4472	346.259	-2.61414	2.10499e-06
LOC_Os02g36264	215.09	1177.48	-2.45199	2.13316e-06
LOC_Os04g54002	95.3779	550.725	-2.528	2.13316e-06
LOC_Os07g31070	18.4898	143.848	-2.95108	2.17921e-06
LOC_Os08g10150	18.4898	143.848	-2.95108	2.17921e-06
LOC_Os03g09910	31.1423	213.716	-2.77369	2.24804e-06
LOC_Os01g55270	428.235	71.925	2.57181	2.24804e-06
LOC_Os01g08860	233.582	34.9362	2.73686	2.25781e-06
LOC_Os04g40440	118.736	670.939	-2.49714	2.35736e-06
LOC_Os09g26144	95.3779	546.615	-2.5172	2.37499e-06
LOC_Os03g29950	496.364	86.3096	2.52213	2.55569e-06
LOC_Os04g52260	2338.76	442.841	2.40056	2.56356e-06
LOC_Os04g59440	6228.9	1201.11	2.37449	2.59326e-06
LOC_Os02g38450	36.9819	1.38778e-17	8.21423	2.59326e-06
LOC_Os04g33200	81.7522	7.19459	3.48413	2.59326e-06
LOC_Os04g49739	6.81059	82.1997	-3.56873	2.59326e-06
LOC_Os02g13460	66.1799	392.495	-2.56589	2.6778e-06
LOC_Os04g24220	797.103	4149.94	-2.38007	2.68576e-06
LOC_Os07g39720	10.7037	103.777	-3.26196	2.71673e-06
LOC_Os02g40130	143.068	787.043	-2.45868	2.76549e-06
LOC_Os10g42610	426.289	72.9525	2.54481	2.77615e-06
LOC_Os11g27170	64.2334	4.1122	3.9258	2.80228e-06
LOC_Os01g09190	158.64	862.048	-2.44106	2.85823e-06
LOC_Os09g04310	114.843	640.115	-2.47734	2.97971e-06
novel.730	50.6076	2.05729	4.54065	3.12718e-06
LOC_Os01g18310	50.6076	2.05729	4.54065	3.12718e-06
LOC_Os09g30466	213.143	31.8538	2.7376	3.19773e-06
LOC_Os02g50250	0.970936	44.1834	-5.33426	3.27838e-06
LOC_Os02g36190	42.8215	269.199	-2.64864	3.30615e-06
LOC_Os08g37930	421.422	72.9525	2.52825	3.31293e-06
LOC_Os04g58860	7.78386	86.3096	-3.44962	3.34008e-06
LOC_Os02g48190	69.0997	5.13966	3.71757	3.34008e-06
LOC_Os03g09170	69.0997	5.13966	3.71757	3.34008e-06
LOC_Os11g45280	472.032	2443.32	-2.37157	3.34846e-06
LOC_Os07g26660	56.4472	3.08475	4.14069	3.35495e-06
LOC_Os03g62200	846.74	4340.03	-2.35754	3.35495e-06
LOC_Os05g45920	212.17	31.8538	2.731	3.37665e-06
LOC_Os03g01200	1973.78	381.193	2.372	3.5632e-06
LOC_Os03g13870	1168.89	222.963	2.38963	3.99878e-06
LOC_Os07g35730	36.9819	235.292	-2.66536	4.02935e-06
LOC_Os02g17590	37.9551	240.43	-2.65916	4.03951e-06
LOC_Os09g19380	114.843	626.758	-2.44693	4.04445e-06
LOC_Os05g32820	1515.37	292.831	2.37105	4.12927e-06
LOC_Os07g03170	11.6769	105.831	-3.16607	4.20666e-06
LOC_Os01g70525	2.91749	56.513	-4.21731	4.20666e-06
LOC_Os05g03070	78.8324	7.19459	3.43174	4.21946e-06
LOC_Os06g50950	42.8215	1.02984	5.21987	4.25511e-06
LOC_Os03g28170	76.8858	434.621	-2.49699	4.36965e-06
LOC_Os03g44380	413.636	72.9525	2.50135	4.36965e-06
LOC_Os03g64030	115.816	13.3594	3.10431	4.46282e-06
LOC_Os10g34230	146.961	19.5242	2.90431	4.46282e-06
LOC_Os05g45210	221.903	1151.79	-2.37521	4.63158e-06
LOC_Os11g44700	17.5165	131.518	-2.89938	4.7507e-06
LOC_Os08g19420	35.0353	1.38778e-17	8.1365	4.7646e-06
LOC_Os09g34230	67.1532	5.13966	3.67642	4.86507e-06
LOC_Os06g43384	1.94421	49.3207	-4.57704	5.04369e-06
LOC_Os01g42234	45.7413	276.391	-2.59178	5.07103e-06
LOC_Os04g59020	61.3136	4.1122	3.85882	5.12611e-06
LOC_Os10g39260	80.7789	449.006	-2.47281	5.13171e-06
LOC_Os03g58290	1387.88	6866.57	-2.3066	5.16259e-06
LOC_Os05g35520	124.576	15.4143	3.00472	5.18616e-06
LOC_Os09g24620	1347.97	264.061	2.35131	5.28228e-06
LOC_Os05g39560	104.137	12.3319	3.0655	5.41018e-06
LOC_Os10g02260	189.785	28.7714	2.71649	5.49237e-06
LOC_Os04g46680	0.970936	42.1285	-5.26575	5.56317e-06
LOC_Os10g07004	58.3938	332.902	-2.5086	5.64662e-06
LOC_Os03g55164	238.448	39.0461	2.60667	5.73732e-06
LOC_Os09g12290	12146.4	2479.28	2.29247	5.76187e-06
LOC_Os04g57850	50.6076	292.831	-2.52962	5.80042e-06
LOC_Os04g30060	28.2225	183.919	-2.69863	5.91508e-06
LOC_Os07g48730	10.7037	98.6392	-3.1888	5.9958e-06
LOC_Os01g02560	286.138	1442.57	-2.33334	6.09328e-06
LOC_Os12g02720	34.0621	213.716	-2.6449	6.22103e-06
LOC_Os02g41670	3.89077	60.6229	-3.91822	6.2517e-06
LOC_Os11g44430	54.5007	311.325	-2.51128	6.25259e-06
LOC_Os09g18594	5097.97	24776.4	-2.28094	6.3035e-06
LOC_Os05g10670	1816.11	363.726	2.31955	6.34879e-06
LOC_Os10g42130	122.629	15.4143	2.98202	6.41457e-06
LOC_Os03g19090	436.994	80.1448	2.44515	6.41457e-06
LOC_Os07g41190	127.496	16.4418	2.94573	6.42225e-06
LOC_Os01g34050	34.0621	1.38778e-17	8.096	6.42225e-06
LOC_Os01g68720	97.3244	517.846	-2.41011	6.71621e-06
LOC_Os12g03370	38.9284	236.32	-2.59789	6.80472e-06
LOC_Os01g50460	1194.2	5799.03	-2.27965	6.84874e-06
LOC_Os03g05620	805.863	3938.29	-2.28878	6.858e-06
LOC_Os11g29870	83.6987	454.143	-2.43807	6.91085e-06
LOC_Os05g32420	12.6502	106.859	-3.06569	7.0082e-06
LOC_Os08g36500	103.164	545.588	-2.40142	7.04984e-06
LOC_Os07g15959	111.923	13.3594	3.05504	7.04984e-06
LOC_Os02g15930	278.352	48.2933	2.52402	7.06492e-06
LOC_Os09g19300	546	2677.58	-2.29369	7.06804e-06
LOC_Os04g09260	19.4631	137.683	-2.81442	7.06804e-06
LOC_Os02g14440	190.758	29.7989	2.67345	7.18276e-06
LOC_Os06g33549	190.758	29.7989	2.67345	7.18276e-06
LOC_Os06g13570	263.753	45.2109	2.54123	7.18282e-06
LOC_Os01g02790	582.011	2839.92	-2.28648	7.44135e-06
LOC_Os01g52060	58.3938	4.1122	3.78858	7.54543e-06
LOC_Os08g04450	334.801	59.5954	2.48761	7.70774e-06
LOC_Os12g36860	204.384	1025.42	-2.32613	7.70774e-06
LOC_Os06g21820	42.8215	252.759	-2.55778	7.71994e-06
LOC_Os11g45130	41.8482	248.649	-2.56721	7.78907e-06
LOC_Os10g37710	287.111	1418.94	-2.30461	7.94693e-06
LOC_Os07g02460	1098.82	219.88	2.32052	7.9501e-06
LOC_Os05g32960	46.7145	2.05729	4.42547	7.97796e-06
LOC_Os12g35670	74.9393	7.19459	3.3588	7.97796e-06
LOC_Os04g52190	596.61	2886.16	-2.27404	8.24053e-06
novel.465	154.747	22.6066	2.76848	8.24053e-06
LOC_Os03g47810	582.984	2823.48	-2.27569	8.2694e-06
LOC_Os03g10100	1374.25	6573.74	-2.25796	8.28277e-06
LOC_Os04g41130	140.148	19.5242	2.83589	8.47325e-06
LOC_Os10g41060	255.967	44.1834	2.5311	8.47325e-06
LOC_Os04g43670	8.75713	85.2821	-3.26498	8.49514e-06
LOC_Os06g48520	8.75713	85.2821	-3.26498	8.49514e-06
LOC_Os03g21710	26.2759	169.534	-2.68384	8.61539e-06
LOC_Os09g29950	100.244	12.3319	3.0106	8.80363e-06
LOC_Os06g20790	22.3829	148.985	-2.72771	9.08792e-06
LOC_Os09g19290	1170.84	5566.82	-2.24919	9.16976e-06
LOC_Os05g48010	208.277	1031.58	-2.30757	9.16976e-06
LOC_Os02g51900	76.8858	410.989	-2.41636	9.282e-06
novel.390	39.9017	1.02984	5.1183	9.28444e-06
LOC_Os04g55450	0.970936	40.0735	-5.19382	9.28444e-06
LOC_Os02g13600	39.9017	1.02984	5.1183	9.28444e-06
LOC_Os11g04910	325.069	58.568	2.47011	9.51162e-06
LOC_Os09g31120	598.557	117.134	2.35213	9.51844e-06
LOC_Os03g50960	78.8324	8.22206	3.24218	9.65548e-06
LOC_Os04g29680	2.91749	52.4032	-4.10863	9.84019e-06
LOC_Os11g32650	2579.15	12153.9	-2.23639	9.84019e-06
LOC_Os09g23595	109.004	13.3594	3.01695	9.85899e-06
LOC_Os04g10940	4162.66	876.432	2.24763	1.00412e-05
LOC_Os03g51530	68.1264	6.16713	3.43983	1.07105e-05
LOC_Os07g03750	5.83732	67.8152	-3.50973	1.07105e-05
LOC_Os05g38150	3696.46	781.905	2.2409	1.09355e-05
LOC_Os09g19390	152.801	761.356	-2.31595	1.10581e-05
LOC_Os07g29960	50.6076	279.474	-2.4623	1.12517e-05
novel.451	20.4363	137.683	-2.74447	1.12747e-05
LOC_Os01g41750	212.17	1034.66	-2.28517	1.14056e-05
LOC_Os11g05800	8.75713	83.2272	-3.22984	1.14861e-05
LOC_Os04g21790	9.7304	88.3645	-3.16616	1.15058e-05
LOC_Os02g07654	32.1155	1.38778e-17	8.01143	1.18641e-05
LOC_Os07g01560	629.701	2970.41	-2.23769	1.18966e-05
LOC_Os02g13620	4.86405	62.6778	-3.65329	1.22454e-05
LOC_Os05g48810	671.552	134.601	2.31777	1.22703e-05
LOC_Os01g45250	231.635	1115.83	-2.26756	1.23772e-05
LOC_Os05g05680	815.595	3810.88	-2.22402	1.27165e-05
LOC_Os01g50100	380.545	1802.18	-2.24322	1.27233e-05
LOC_Os12g42630	1.94421	45.2109	-4.45184	1.30234e-05
LOC_Os11g18570	120.683	16.4418	2.86658	1.33338e-05
LOC_Os01g66760	7.78386	77.0624	-3.28637	1.33733e-05
LOC_Os10g36580	391.251	75.0074	2.3811	1.34643e-05
LOC_Os12g32760	4201.59	19357.5	-2.20385	1.34643e-05
LOC_Os11g11020	326.042	60.6229	2.42477	1.36399e-05
LOC_Os03g29770	55.474	4.1122	3.71474	1.39105e-05
LOC_Os09g19280	240.395	1148.71	-2.25593	1.39298e-05
novel.169	390.278	75.0074	2.37751	1.39298e-05
LOC_Os05g25920	29.1957	176.727	-2.59242	1.40448e-05
LOC_Os07g25150	315.336	58.568	2.42627	1.40448e-05
LOC_Os11g25260	522.642	103.777	2.33099	1.40471e-05
LOC_Os03g37260	209.25	35.9637	2.53658	1.45897e-05
LOC_Os06g40240	383.465	73.98	2.37198	1.45897e-05
LOC_Os12g07880	139.175	20.5517	2.75231	1.45897e-05
LOC_Os06g45960	21.4096	138.71	-2.68847	1.45897e-05
LOC_Os04g42620	61.3136	5.13966	3.54543	1.47206e-05
LOC_Os02g37160	4.86405	61.6504	-3.62949	1.47206e-05
LOC_Os01g04470	11.6769	96.5843	-3.03432	1.47206e-05
LOC_Os04g29550	3278.93	707.928	2.21136	1.48124e-05
LOC_Os08g43450	9.7304	86.3096	-3.13226	1.52796e-05
LOC_Os01g53390	116.79	579.494	-2.30962	1.53061e-05
LOC_Os03g60090	2449.71	11186	-2.19096	1.54596e-05
LOC_Os01g25340	1.38778e-17	30.8263	-7.95235	1.62954e-05
LOC_Os02g14680	146.961	22.6066	2.69406	1.65938e-05
LOC_Os01g34790	94.4046	471.61	-2.3191	1.68284e-05
LOC_Os10g08474	479.818	95.5568	2.32659	1.6844e-05
LOC_Os01g02570	716.322	3285.84	-2.19738	1.69152e-05
LOC_Os07g42420	242.341	44.1834	2.45222	1.72518e-05
LOC_Os04g54830	470.086	93.5019	2.32836	1.72932e-05
LOC_Os05g39350	100.244	497.297	-2.30911	1.73621e-05
novel.388	202.437	958.63	-2.24278	1.73938e-05
LOC_Os07g30330	59.367	5.13966	3.49899	1.79861e-05
LOC_Os12g38550	74.9393	8.22206	3.16924	1.83983e-05
LOC_Os10g33140	520.695	2386.81	-2.19629	1.87273e-05
LOC_Os07g44740	880.804	185.974	2.24298	1.88304e-05
novel.288	181.999	30.8263	2.55697	1.92474e-05
LOC_Os01g26270	31.1423	181.864	-2.54101	1.92474e-05
LOC_Os03g37630	2.91749	49.3207	-4.02138	1.94924e-05
LOC_Os09g09500	54.5007	286.666	-2.39228	1.94924e-05
LOC_Os05g26040	167.4	27.7439	2.58778	1.96231e-05
LOC_Os10g35370	6177.32	1371.67	2.17095	1.96231e-05
LOC_Os03g40550	121.656	17.4693	2.79133	1.96231e-05
LOC_Os07g40000	1875.48	408.934	2.19699	1.97219e-05
LOC_Os11g10120	53.5274	281.528	-2.39213	1.98648e-05
LOC_Os03g26820	1903.71	417.154	2.18983	2.10032e-05
novel.740	36.9819	1.02984	5.00903	2.15528e-05
LOC_Os12g12570	130.415	623.675	-2.25656	2.16424e-05
LOC_Os03g25050	152.801	24.6615	2.62536	2.19765e-05
LOC_Os02g14840	433.101	1969.66	-2.18483	2.19765e-05
LOC_Os02g10400	171.293	28.7714	2.56869	2.22302e-05
LOC_Os02g02540	72.9928	367.836	-2.33121	2.22806e-05
novel.378	197.571	34.9362	2.49545	2.22908e-05
LOC_Os02g53840	229.689	1065.49	-2.21313	2.24784e-05
LOC_Os11g44960	30.169	1.38778e-17	7.9216	2.25286e-05
LOC_Os09g34180	139.175	21.5791	2.68233	2.25376e-05
ChrSy.fgenesh.gene.14	76.8858	385.303	-2.32328	2.28607e-05
LOC_Os11g07960	867.178	185.974	2.22049	2.34981e-05
LOC_Os10g24980	110.95	15.4143	2.83779	2.38566e-05
LOC_Os01g59980	781.531	166.452	2.23037	2.38738e-05
LOC_Os12g11680	2.91749	48.2933	-3.99108	2.45457e-05
LOC_Os06g22290	2.91749	48.2933	-3.99108	2.45457e-05
LOC_Os03g51240	77.8591	9.24952	3.05677	2.46516e-05
LOC_Os11g02389	11182.8	2531.68	2.14306	2.48468e-05
LOC_Os03g53910	2011.74	446.951	2.16995	2.50084e-05
LOC_Os03g55010	183.945	853.828	-2.21388	2.50716e-05
LOC_Os12g42876	5113.54	22528.3	-2.13931	2.51063e-05
LOC_Os06g22919	91.4848	12.3319	2.87886	2.51168e-05
LOC_Os11g35450	7.78386	72.9525	-3.20743	2.53481e-05
LOC_Os09g36040	3526.14	793.207	2.15215	2.58257e-05
LOC_Os05g40630	68.1264	7.19459	3.22154	2.60604e-05
LOC_Os07g15770	33.0888	185.974	-2.4861	2.75702e-05
LOC_Os04g01850	41.8482	2.05729	4.26722	2.75702e-05
LOC_Os01g24710	41.8482	2.05729	4.26722	2.75702e-05
LOC_Os03g59770	1.94421	42.1285	-4.35025	2.75702e-05
LOC_Os12g27335	463.273	95.5568	2.27598	2.75702e-05
LOC_Os09g09040	198.544	35.9637	2.46086	2.80085e-05
LOC_Os07g07930	16.5433	108.914	-2.70944	3.0165e-05
LOC_Os01g04280	196.598	894.927	-2.18579	3.02857e-05
LOC_Os03g09900	153.774	711.01	-2.20812	3.1188e-05
LOC_Os09g11780	2.91749	47.2658	-3.96014	3.1188e-05
LOC_Os10g39190	29.1957	1.38778e-17	7.87449	3.15958e-05
LOC_Os06g18010	915.842	3998.91	-2.12628	3.17193e-05
LOC_Os02g54710	289.058	56.513	2.35221	3.17213e-05
LOC_Os07g05365	104.137	14.3869	2.84518	3.17972e-05
LOC_Os07g32590	379.572	78.0898	2.27938	3.20901e-05
LOC_Os02g48690	9.7304	81.1722	-3.04385	3.20992e-05
LOC_Os10g38740	196.598	35.9637	2.44665	3.20992e-05
novel.528	284.192	55.4856	2.35414	3.2596e-05
novel.595	108.03	15.4143	2.79936	3.38337e-05
LOC_Os12g36850	445.754	1965.55	-2.14029	3.38675e-05
LOC_Os10g04290	46.7145	244.54	-2.38492	3.41611e-05
LOC_Os06g45940	59.367	295.913	-2.31495	3.42017e-05
LOC_Os03g25960	403.903	84.2547	2.25954	3.42927e-05
LOC_Os10g32550	865.232	191.111	2.17796	3.43638e-05
LOC_Os02g43790	36.9819	200.359	-2.43362	3.5195e-05
LOC_Os12g32280	120.683	18.4967	2.69786	3.52427e-05
LOC_Os01g01340	3752.91	864.103	2.11858	3.53882e-05
LOC_Os08g38460	575.198	124.326	2.20883	3.55014e-05
LOC_Os06g07200	73.966	359.616	-2.27954	3.67272e-05
LOC_Os03g02020	1698.35	386.33	2.13588	3.72403e-05
LOC_Os02g36070	9.7304	80.1448	-3.0255	3.73073e-05
LOC_Os03g64130	35.0353	1.02984	4.9313	3.82663e-05
novel.454	35.0353	1.02984	4.9313	3.82663e-05
LOC_Os05g47650	167.4	755.191	-2.17268	3.87622e-05
LOC_Os01g57073	447.7	1954.25	-2.12569	3.87622e-05
LOC_Os02g15160	61.3136	6.16713	3.28812	3.87622e-05
LOC_Os04g32740	101.217	473.665	-2.22497	3.87622e-05
LOC_Os02g28980	3224.43	746.971	2.10974	3.9498e-05
LOC_Os01g59090	983.97	220.908	2.15456	3.95224e-05
LOC_Os06g13340	4.86405	56.513	-3.50423	3.98954e-05
LOC_Os11g11970	46.7145	241.457	-2.36663	4.00331e-05
LOC_Os10g41870	158.64	27.7439	2.51031	4.02163e-05
LOC_Os08g14020	13.6235	93.5019	-2.76738	4.05551e-05
LOC_Os03g10030	483.711	2098.09	-2.11656	4.11725e-05
LOC_Os06g06290	7103.87	1665.53	2.09255	4.13832e-05
LOC_Os04g59150	96.3512	449.006	-2.21885	4.18712e-05
LOC_Os03g08170	139.175	629.84	-2.17705	4.36124e-05
LOC_Os04g42760	28.2225	1.38778e-17	7.82579	4.38788e-05
LOC_Os02g45160	28.2225	1.38778e-17	7.82579	4.38788e-05
LOC_Os01g08530	28.2225	1.38778e-17	7.82579	4.38788e-05
LOC_Os01g06750	149.881	676.076	-2.17241	4.39501e-05
LOC_Os06g20150	51.5809	255.842	-2.30748	4.47747e-05
LOC_Os04g10010	5.83732	60.6229	-3.34829	4.70953e-05
LOC_Os02g32504	309.497	63.7053	2.27826	4.73918e-05
LOC_Os09g11250	237.475	47.2658	2.32594	4.73918e-05
LOC_Os02g01590	16579.6	69734.2	-2.07245	4.73918e-05
LOC_Os04g29960	73.966	352.424	-2.2504	4.77408e-05
LOC_Os07g31190	16.5433	104.804	-2.65401	4.78078e-05
LOC_Os02g40664	19.4631	118.161	-2.59404	4.82799e-05
LOC_Os01g48960	775.691	3298.17	-2.08793	4.86757e-05
LOC_Os02g39850	1113.41	4698.61	-2.07712	4.95877e-05
LOC_Os10g12354	582.011	128.436	2.17894	4.95877e-05
LOC_Os08g30340	44.768	3.08475	3.8071	4.96718e-05
LOC_Os07g29310	44.768	3.08475	3.8071	4.96718e-05
LOC_Os06g42020	2.91749	45.2109	-3.89618	4.96718e-05
LOC_Os12g32330	278.352	56.513	2.29779	5.02828e-05
LOC_Os04g54300	245.261	49.3207	2.31122	5.10579e-05
LOC_Os10g02410	111.923	509.626	-2.18564	5.16836e-05
LOC_Os05g04720	159.613	28.7714	2.46689	5.24725e-05
LOC_Os12g36440	13.6235	91.4469	-2.73536	5.29121e-05
LOC_Os11g44860	53.5274	260.979	-2.28284	5.33396e-05
LOC_Os03g18870	116.79	18.4967	2.65061	5.35521e-05
LOC_Os03g59430	290.031	59.5954	2.2806	5.42194e-05
LOC_Os01g68740	138.202	615.455	-2.15384	5.495e-05
LOC_Os08g39694	356.213	76.0349	2.2262	5.62503e-05
LOC_Os09g36930	1514.4	354.479	2.0946	5.64225e-05
LOC_Os06g45970	231.635	999.728	-2.10907	5.64876e-05
LOC_Os03g58980	54.5007	264.061	-2.27383	5.65542e-05
LOC_Os09g16920	158.64	28.7714	2.45807	5.6728e-05
LOC_Os12g12090	531.401	2242.96	-2.07727	5.71348e-05
LOC_Os02g33020	213.143	42.1285	2.33562	5.94206e-05
LOC_Os03g07570	271.539	1161.04	-2.09566	6.00356e-05
LOC_Os02g18080	272.512	1163.1	-2.09305	6.16869e-05
LOC_Os08g03240	1.38778e-17	26.7165	-7.74679	6.18463e-05
LOC_Os09g25690	27.2492	1.38778e-17	7.77539	6.18463e-05
LOC_Os01g49580	40.8749	208.578	-2.34767	6.25607e-05
LOC_Os06g46900	1008.3	235.292	2.09883	6.26132e-05
LOC_Os02g56370	37.9551	195.221	-2.35882	6.47585e-05
LOC_Os01g09150	34.0621	177.754	-2.37926	6.63932e-05
LOC_Os04g03050	105.111	471.61	-2.16432	6.63932e-05
LOC_Os09g19310	241.368	1028.5	-2.09064	6.78718e-05
LOC_Os10g33210	435.048	1821.7	-2.06572	6.8915e-05
LOC_Os08g05780	5.83732	58.568	-3.29864	6.92589e-05
LOC_Os10g39170	33.0888	1.02984	4.84914	6.92589e-05
LOC_Os07g29940	101.217	453.116	-2.161	6.9471e-05
LOC_Os08g28790	126.522	554.835	-2.13153	7.01408e-05
LOC_Os06g45620	67.1532	8.22206	3.01125	7.01408e-05
LOC_Os12g41830	147.934	26.7165	2.46379	7.07393e-05
LOC_Os04g41140	126.522	21.5791	2.54496	7.12845e-05
LOC_Os09g29540	1262.32	5182.55	-2.03747	7.14946e-05
LOC_Os07g48020	904.162	3720.46	-2.04067	7.16513e-05
LOC_Os08g38700	370.812	1553.53	-2.06641	7.22195e-05
LOC_Os10g30410	18.4898	109.941	-2.56365	7.22197e-05
novel.478	52.5542	5.13966	3.32353	7.4042e-05
LOC_Os05g44030	113.87	18.4967	2.61412	7.4042e-05
LOC_Os03g04130	237.475	49.3207	2.2647	7.46749e-05
LOC_Os01g62770	551.84	125.353	2.13717	7.51548e-05
LOC_Os02g53720	62.2868	7.19459	3.0925	7.6641e-05
LOC_Os01g54270	123.603	539.423	-2.12455	7.6641e-05
LOC_Os11g02610	681.284	2800.88	-2.03934	7.79925e-05
LOC_Os04g53370	232.608	48.2933	2.26514	7.84335e-05
LOC_Os04g02880	3.89077	48.2933	-3.59093	7.84335e-05
LOC_Os08g19550	13.6235	88.3645	-2.68596	7.92886e-05
LOC_Os01g06240	41.8482	208.578	-2.31382	8.0769e-05
LOC_Os07g43740	42.8215	3.08475	3.74316	8.103e-05
LOC_Os08g30910	212.17	43.1559	2.29436	8.1041e-05
LOC_Os01g43160	170.319	32.8813	2.36861	8.12878e-05
LOC_Os03g60840	1336.29	320.572	2.0591	8.12878e-05
LOC_Os03g29850	783.477	3203.65	-2.03157	8.14719e-05
LOC_Os01g66100	2938.29	718.202	2.03233	8.19852e-05
LOC_Os04g49748	185.892	790.125	-2.08686	8.3078e-05
LOC_Os11g34600	5.83732	57.5405	-3.27316	8.33179e-05
novel.428	5.83732	57.5405	-3.27316	8.33179e-05
LOC_Os04g49560	21.4096	121.243	-2.49449	8.50112e-05
LOC_Os02g40180	215.09	903.146	-2.06936	8.85133e-05
LOC_Os02g42190	193.678	817.867	-2.07748	8.94193e-05
LOC_Os03g20949	252.074	1050.07	-2.05801	9.04429e-05
LOC_Os03g01300	549.893	2243.99	-2.02859	9.08767e-05
LOC_Os07g38260	117.763	512.709	-2.12104	9.08767e-05
LOC_Os11g37200	60.3403	7.19459	3.04679	9.19727e-05
novel.195	29.1957	153.095	-2.38548	9.24291e-05
LOC_Os05g10754	1164.02	280.501	2.05257	9.26441e-05
LOC_Os06g01966	32.1155	1.02984	4.80623	9.30331e-05
LOC_Os03g20740	9.7304	73.98	-2.91021	9.33256e-05
LOC_Os02g50460	55.474	257.897	-2.21429	9.34044e-05
LOC_Os08g43190	3248.76	802.455	2.01723	9.39552e-05
LOC_Os04g17660	333.828	73.98	2.17206	9.47859e-05
LOC_Os11g12320	92.4581	405.852	-2.13254	9.5171e-05
LOC_Os10g41190	2060.4	8247.49	-2.00096	9.69733e-05
LOC_Os11g32369	444.781	101.722	2.12714	9.82956e-05
LOC_Os03g48300	1636.06	6539.83	-1.99894	0.000100358
LOC_Os11g42800	18.4898	106.859	-2.52267	0.00010101
LOC_Os05g50100	415.583	1689.16	-2.02276	0.000101224
LOC_Os12g02320	24930.2	6270.64	1.99119	0.00010288
LOC_Os08g27790	1.94421	36.9911	-4.16322	0.000103765
LOC_Os05g48200	614.129	144.875	2.08281	0.000103979
LOC_Os11g03240	105.111	455.17	-2.11314	0.000103995
LOC_Os12g07210	31160.1	7848.83	1.98913	0.000104212
LOC_Os06g02380	8283.47	2080.62	1.99316	0.000104212
LOC_Os02g08100	1496.88	5960.34	-1.99334	0.00010607
LOC_Os04g29950	14.5967	90.4195	-2.62042	0.000106075
LOC_Os12g03230	24.3294	131.518	-2.42831	0.000106251
LOC_Os05g49130	135.282	24.6615	2.44983	0.000106751
LOC_Os10g03100	26.2759	138.71	-2.39457	0.00010716
LOC_Os03g38800	15.57	94.5293	-2.59212	0.00010795
LOC_Os08g01390	207.304	856.91	-2.04672	0.000108632
LOC_Os07g03200	711.456	2849.17	-2.0015	0.000108796
LOC_Os07g37620	59.367	7.19459	3.02338	0.000109772
LOC_Os05g35200	622.888	147.958	2.07289	0.000109772
LOC_Os07g42370	1888.13	7484.08	-1.98679	0.000110472
LOC_Os01g61700	586.878	138.71	2.08002	0.000110666
LOC_Os11g42500	50.6076	5.13966	3.26921	0.000111522
LOC_Os08g03350	1112.44	4418.11	-1.98958	0.0001117
LOC_Os09g18360	149.881	628.813	-2.06787	0.000114191
LOC_Os10g39770	48.6611	230.155	-2.23877	0.000114527
LOC_Os07g01230	7.78386	63.7053	-3.01224	0.000116658
ChrUn.fgenesh.gene.85	7.78386	63.7053	-3.01224	0.000116658
LOC_Os09g31482	13732.8	3488.26	1.97701	0.000117996
LOC_Os08g39430	842.847	204.468	2.04274	0.000119208
LOC_Os11g38260	7218.72	1834.03	1.97665	0.000122013
LOC_Os11g35980	3.89077	46.2383	-3.52835	0.000122661
LOC_Os10g04690	43.7947	209.606	-2.25551	0.000122718
LOC_Os03g21560	6031.33	1531.96	1.97702	0.000122718
LOC_Os01g62140	25.3027	1.38778e-17	7.66898	0.000122865
novel.606	25.3027	1.38778e-17	7.66898	0.000122865
LOC_Os02g13780	1.38778e-17	24.6615	-7.63188	0.000122865
LOC_Os08g08420	31.1423	1.02984	4.76201	0.000124956
LOC_Os02g12260	0.970936	30.8263	-4.81665	0.000124956
LOC_Os06g36070	1038.47	255.842	2.02063	0.000125299
LOC_Os07g03890	737.734	2922.12	-1.98566	0.000126019
LOC_Os03g46280	21.4096	117.134	-2.44479	0.00012669
LOC_Os01g04480	28.2225	144.875	-2.35463	0.000126729
LOC_Os07g49400	17898.4	4578.4	1.96688	0.00012791
LOC_Os06g41980	45.7413	215.771	-2.23474	0.000128651
LOC_Os01g08930	473.979	111.996	2.08018	0.000130721
LOC_Os12g14699	40.8749	3.08475	3.67624	0.000130721
LOC_Os05g36020	40.8749	3.08475	3.67624	0.000130721
LOC_Os02g47600	452.567	1799.1	-1.99076	0.000130721
LOC_Os02g16060	131.389	548.67	-2.06102	0.000130723
LOC_Os03g56800	191.731	40.0735	2.25491	0.000131114
LOC_Os08g07660	38.9284	188.029	-2.26829	0.000131552
LOC_Os11g04894	79.8056	12.3319	2.68211	0.000132105
LOC_Os11g27540	83.6987	13.3594	2.63636	0.000134502
LOC_Os01g02610	4.86405	50.3482	-3.33797	0.000136995
LOC_Os03g24910	7.78386	62.6778	-2.98883	0.00013798
LOC_Os02g57010	669.605	162.342	2.04346	0.00013798
LOC_Os02g17090	22.3829	120.216	-2.41846	0.000139784
LOC_Os07g42740	37.9551	182.892	-2.26476	0.000141689
LOC_Os12g07810	198.544	804.51	-2.01795	0.000142401
LOC_Os04g09530	218.009	47.2658	2.20262	0.000143437
LOC_Os04g30110	44.768	210.633	-2.23094	0.000145018
LOC_Os07g09340	2510.05	9731.15	-1.95484	0.000145018
LOC_Os07g03950	43.7947	206.523	-2.23415	0.000145795
LOC_Os01g38610	158.64	31.8538	2.31183	0.000146189
LOC_Os03g20210	5.83732	54.4581	-3.19391	0.000148761
LOC_Os12g24050	146.961	28.7714	2.34784	0.000148761
LOC_Os12g36880	6164.67	23782.8	-1.9478	0.000150929
LOC_Os02g51710	594.664	144.875	2.03635	0.000154498
novel.88	12.6502	83.2272	-2.70558	0.000154784
LOC_Os03g43420	266.673	59.5954	2.15952	0.000155122
LOC_Os09g14450	292.951	1164.12	-1.99004	0.000155159
LOC_Os07g36390	963.532	240.43	2.00217	0.000155159
LOC_Os06g05284	19.4631	106.859	-2.44915	0.000155871
LOC_Os07g03025	180.052	729.504	-2.01773	0.000155871
LOC_Os04g24804	725.081	178.782	2.01921	0.000156183
LOC_Os03g56944	57.4205	7.19459	2.97539	0.000157213
LOC_Os05g43576	57.4205	7.19459	2.97539	0.000157213
LOC_Os03g30130	35.0353	169.534	-2.27051	0.000166645
LOC_Os08g06170	590.771	2296.39	-1.95847	0.000168484
LOC_Os04g53850	24.3294	126.381	-2.37088	0.000168543
LOC_Os02g20190	4.86405	49.3207	-3.30829	0.000169873
LOC_Os09g16950	628.728	2438.18	-1.95508	0.00017128
LOC_Os04g15530	526.535	2044.66	-1.957	0.000172174
LOC_Os02g43050	70.073	10.277	2.75494	0.000173276
LOC_Os05g12640	24.3294	1.38778e-17	7.61268	0.000174461
LOC_Os01g18300	24.3294	1.38778e-17	7.61268	0.000174461
LOC_Os03g51350	24.3294	1.38778e-17	7.61268	0.000174461
LOC_Os10g35300	24.3294	1.38778e-17	7.61268	0.000174461
LOC_Os02g46270	36.9819	175.699	-2.24427	0.000174834
LOC_Os04g39130	18.4898	101.722	-2.45167	0.000174952
LOC_Os08g36250	35.0353	2.05729	4.01171	0.00017614
LOC_Os11g24070	35.0353	2.05729	4.01171	0.00017614
LOC_Os12g42150	81.7522	13.3594	2.60246	0.000176508
LOC_Os09g32730	12.6502	82.1997	-2.68769	0.000176508
LOC_Os11g09160	301.71	69.8701	2.10849	0.000179576
LOC_Os11g41670	85.6452	359.616	-2.06836	0.00018112
LOC_Os08g15149	422.395	1638.81	-1.95566	0.000182594
LOC_Os04g43760	899.296	3446.13	-1.93796	0.000185479
LOC_Os03g19930	737.734	184.946	1.99528	0.000185894
LOC_Os01g36294	132.362	536.34	-2.0176	0.000189942
LOC_Os03g26870	608.289	151.04	2.00896	0.000189942
LOC_Os04g15650	111.923	460.308	-2.03883	0.000190668
LOC_Os11g45540	3.89077	44.1834	-3.46295	0.000191923
LOC_Os03g49830	192.705	766.493	-1.99116	0.000193443
LOC_Os03g43970	56.4472	247.622	-2.13063	0.000193552
LOC_Os03g16950	61.3136	8.22206	2.88026	0.000195991
LOC_Os05g32970	219.956	867.185	-1.97849	0.000196504
LOC_Os09g27030	2099.33	546.615	1.9411	0.000198575
LOC_Os04g49160	32.1155	155.15	-2.26776	0.000198575
LOC_Os03g42020	196.598	43.1559	2.18445	0.000198638
LOC_Os04g40720	196.598	43.1559	2.18445	0.000198638
LOC_Os12g11550	47.6878	215.771	-2.17478	0.000198753
LOC_Os05g51150	92.4581	15.4143	2.57508	0.000198753
novel.680	31.1423	151.04	-2.27327	0.000200479
LOC_Os05g17604	41.8482	193.166	-2.20314	0.000200506
LOC_Os09g38980	146.961	29.7989	2.29743	0.000203174
novel.823	38.9284	180.837	-2.21206	0.000209067
LOC_Os10g17260	1820.98	6861.43	-1.91372	0.000212968
LOC_Os02g38010	2.91749	39.0461	-3.6853	0.000214971
LOC_Os01g06670	2.91749	39.0461	-3.6853	0.000214971
LOC_Os02g49880	113.87	463.39	-2.02361	0.000215622
LOC_Os02g32814	383.465	92.4744	2.05053	0.000216306
LOC_Os02g07690	96.3512	395.577	-2.03613	0.000218231
novel.503	100.244	17.4693	2.51236	0.000219533
LOC_Os04g53700	100.244	17.4693	2.51236	0.000219533
LOC_Os12g36830	963.532	3634.16	-1.91507	0.000220413
LOC_Os01g08270	441.861	1686.08	-1.9317	0.000227578
LOC_Os12g02340	9684.97	2587.17	1.90433	0.000228092
LOC_Os12g03640	0.970936	28.7714	-4.71753	0.000229985
LOC_Os02g46780	0.970936	28.7714	-4.71753	0.000229985
LOC_Os02g06600	0.970936	28.7714	-4.71753	0.000229985
LOC_Os01g49890	1653.58	433.594	1.93088	0.000230579
LOC_Os08g07890	142.095	565.11	-1.9907	0.000230579
LOC_Os01g26210	104.137	423.319	-2.02192	0.000231147
LOC_Os12g41715	407.796	99.6667	2.03134	0.000231365
LOC_Os06g15370	276.405	64.7328	2.09215	0.000232401
LOC_Os01g51754	201.464	783.96	-1.95957	0.000234521
LOC_Os07g14740	115.816	467.5	-2.01192	0.000236059
LOC_Os06g05700	849.66	3194.4	-1.91043	0.000236657
LOC_Os09g14490	368.866	1407.63	-1.93173	0.000240175
LOC_Os02g25620	42.8215	4.1122	3.34224	0.000241088
LOC_Os01g36220	920.708	3446.13	-1.90401	0.000244248
LOC_Os01g74450	24549.7	6608.67	1.89325	0.000244573
LOC_Os11g12290	48.6611	215.771	-2.14571	0.000245977
LOC_Os05g48390	1775.24	6611.76	-1.89695	0.00024642
LOC_Os02g30650	401.957	98.6392	2.02547	0.000247942
LOC_Os01g19800	23.3561	1.38778e-17	7.5541	0.000247942
novel.61	23.3561	1.38778e-17	7.5541	0.000247942
LOC_Os02g56580	23.3561	1.38778e-17	7.5541	0.000247942
LOC_Os12g33194	117.763	22.6066	2.37482	0.00024795
LOC_Os06g13000	94.4046	16.4418	2.51271	0.000249095
LOC_Os05g44300	1612.7	425.374	1.92237	0.000250071
LOC_Os10g36860	178.106	39.0461	2.18599	0.000254054
LOC_Os09g02430	4.86405	47.2658	-3.24705	0.000258312
LOC_Os09g34140	1803.46	478.802	1.913	0.000260203
LOC_Os03g11910	695.883	178.782	1.95992	0.000260817
LOC_Os02g32580	1152.35	303.105	1.92626	0.000263502
LOC_Os03g56580	55.474	237.347	-2.09456	0.000263768
LOC_Os09g09830	544.054	2041.58	-1.90761	0.00026474
LOC_Os07g03000	436.994	1644.98	-1.91207	0.000268102
LOC_Os03g63150	50.6076	6.16713	3.0119	0.000269205
LOC_Os01g58240	457.433	1716.9	-1.90788	0.00027139
LOC_Os11g35300	37.9551	3.08475	3.56967	0.000275417
LOC_Os07g42750	37.9551	3.08475	3.56967	0.000275417
LOC_Os06g46030	63.2601	9.24952	2.75774	0.000278676
LOC_Os03g13800	875.938	229.128	1.93411	0.000278926
LOC_Os05g49920	112.897	21.5791	2.38074	0.000280431
LOC_Os01g06870	88.565	357.561	-2.01181	0.000285709
LOC_Os05g08610	74.9393	309.27	-2.0432	0.000287618
LOC_Os09g21460	139.175	28.7714	2.26937	0.000287618
LOC_Os06g03520	164.48	35.9637	2.1895	0.000288726
LOC_Os02g50010	1138.72	302.078	1.914	0.000295697
LOC_Os12g40780	119.71	23.6341	2.33466	0.000295697
LOC_Os07g03030	446.727	1669.64	-1.90176	0.000295697
LOC_Os04g32110	121.656	479.83	-1.97858	0.000300283
LOC_Os07g30800	424.342	106.859	1.9883	0.000301148
LOC_Os01g72520	130.415	26.7165	2.28211	0.000301148
LOC_Os11g35960	27.2492	131.518	-2.2656	0.000301148
LOC_Os02g42990	216.063	50.3482	2.09878	0.000301756
LOC_Os11g41100	73.966	304.133	-2.03787	0.000302655
LOC_Os02g41500	41.8482	4.1122	3.30917	0.000303205
LOC_Os07g09710	41.8482	4.1122	3.30917	0.000303205
LOC_Os10g32810	7560.33	2066.24	1.87138	0.00030554
LOC_Os03g29190	440.888	1640.87	-1.89567	0.000308915
LOC_Os09g17600	1142.61	4188.99	-1.87415	0.00030962
LOC_Os02g42160	349.4	1304.89	-1.90058	0.000311221
LOC_Os06g13560	273.486	65.7602	2.05416	0.000311221
LOC_Os12g31540	0.970936	27.7439	-4.6653	0.00031223
LOC_Os05g49220	467.166	119.189	1.9696	0.000315002
LOC_Os11g35850	31.1423	144.875	-2.2132	0.000322981
LOC_Os07g37640	243.314	57.5405	2.07785	0.000323048
LOC_Os08g27800	9.7304	65.7602	-2.74059	0.000325179
LOC_Os12g17430	60.3403	250.704	-2.05246	0.0003279
LOC_Os03g50130	820.462	216.798	1.91949	0.0003284
LOC_Os01g32640	5.83732	50.3482	-3.08096	0.000329118
LOC_Os07g07150	62.2868	9.24952	2.73542	0.000329118
LOC_Os02g50240	9565.26	34666.8	-1.85766	0.000331029
LOC_Os03g64050	184.918	42.1285	2.13082	0.00033178
LOC_Os11g44560	80.7789	326.737	-2.01435	0.000332676
LOC_Os11g25040	399.037	100.694	1.98525	0.00033963
LOC_Os03g03100	181.999	692.516	-1.92717	0.000340472
LOC_Os04g42010	405.85	102.749	1.98055	0.000341882
LOC_Os11g02440	1322.67	4804.44	-1.86082	0.000343518
LOC_Os09g04430	91.4848	362.698	-1.98565	0.000348503
LOC_Os04g37619	7737.47	2138.16	1.85543	0.000350851
LOC_Os01g52540	76.8858	13.3594	2.51406	0.000353409
LOC_Os09g19560	223.849	52.4032	2.09225	0.000353868
LOC_Os08g35490	22.3829	1.38778e-17	7.49303	0.000356791
LOC_Os12g37510	21.4096	1.38778e-17	7.42926	0.000356791
LOC_Os01g50940	24.3294	118.161	-2.27395	0.000356791
LOC_Os08g43390	1005.38	270.226	1.89503	0.000357807
LOC_Os03g61030	378.598	95.5568	1.98487	0.00036005
LOC_Os03g05530	213.143	800.4	-1.90826	0.000361931
LOC_Os01g53040	11.6769	72.9525	-2.63009	0.000361931
LOC_Os10g34440	48.6611	209.606	-2.10392	0.000362276
LOC_Os08g10320	887.617	3221.11	-1.8594	0.000365191
LOC_Os01g09120	712.429	189.056	1.91325	0.000365495
LOC_Os01g43740	113.87	22.6066	2.32638	0.000366791
LOC_Os01g42330	53.5274	222.963	-2.05582	0.000371714
novel.188	53.5274	222.963	-2.05582	0.000371714
LOC_Os05g05630	63.2601	258.924	-2.03095	0.000373419
LOC_Os01g22370	345.507	1270.98	-1.87876	0.000374558
LOC_Os01g06876	48.6611	208.578	-2.09683	0.000384072
LOC_Os01g56290	365.946	92.4744	1.98309	0.000387001
LOC_Os04g58090	8.75713	61.6504	-2.79764	0.00039037
LOC_Os01g74410	307.55	1131.24	-1.87858	0.000391329
LOC_Os08g01950	27.2492	128.436	-2.23142	0.000391329
LOC_Os04g09654	264.726	64.7328	2.0299	0.000395251
novel.743	52.5542	7.19459	2.84792	0.000402935
LOC_Os03g57880	90.5116	16.4418	2.45204	0.000402935
LOC_Os05g36040	32.1155	2.05729	3.88665	0.000404456
LOC_Os04g59200	1.94421	31.8538	-3.94827	0.000404456
LOC_Os05g49880	7913.63	2213.17	1.83817	0.000405682
LOC_Os08g23430	556.706	146.93	1.92091	0.000408315
LOC_Os01g71624	488.578	127.408	1.93812	0.000410904
LOC_Os07g33480	438.941	114.051	1.94321	0.000411647
LOC_Os11g11960	537.241	1942.94	-1.85435	0.000416842
LOC_Os07g35700	101.217	392.495	-1.95385	0.000420438
LOC_Os02g04170	435.048	1579.22	-1.85966	0.000421203
LOC_Os03g20970	35.0353	156.177	-2.15221	0.000424387
LOC_Os11g03580	223.849	53.4306	2.0643	0.000427605
LOC_Os03g25440	27.2492	1.02984	4.57019	0.000428402
LOC_Os03g37377	0.970936	26.7165	-4.6111	0.000428402
LOC_Os12g10180	149.881	565.11	-1.9138	0.000432733
LOC_Os05g05620	47.6878	202.413	-2.08264	0.000441944
LOC_Os09g37620	240.395	58.568	2.03497	0.000447015
LOC_Os05g11010	23.3561	111.996	-2.25532	0.000450243
LOC_Os11g08020	94.4046	364.753	-1.94853	0.000450811
LOC_Os01g02550	123.603	467.5	-1.91815	0.000459304
LOC_Os01g60730	36.0086	3.08475	3.49397	0.000459304
LOC_Os05g48150	36.0086	3.08475	3.49397	0.000459304
LOC_Os03g10820	36.0086	3.08475	3.49397	0.000459304
LOC_Os04g37550	246.234	901.091	-1.87109	0.000460684
LOC_Os01g60170	74.9393	13.3594	2.47713	0.000469754
LOC_Os08g33710	560.599	150.013	1.90103	0.000473647
LOC_Os11g01890	493.444	130.491	1.91796	0.000473696
LOC_Os01g16550	321.176	82.1997	1.96458	0.000476336
LOC_Os01g36790	55.474	8.22206	2.73618	0.00047738
LOC_Os05g20430	55.474	8.22206	2.73618	0.00047738
LOC_Os10g37660	114.843	23.6341	2.27486	0.000477502
LOC_Os03g16910	1926.09	6792.59	-1.81822	0.000485673
LOC_Os05g50570	3.89077	40.0735	-3.3225	0.000486901
LOC_Os01g52530	51.5809	7.19459	2.82102	0.000488705
LOC_Os08g35420	199.517	48.2933	2.04388	0.000496861
LOC_Os03g07340	43.7947	5.13966	3.06118	0.000496861
LOC_Os04g06590	43.7947	5.13966	3.06118	0.000496861
LOC_Os11g29400	755.253	205.496	1.87723	0.000497981
LOC_Os02g37280	34.0621	150.013	-2.13465	0.000511007
LOC_Os05g44340	195.624	47.2658	2.04642	0.000511007
LOC_Os03g53540	53.5274	216.798	-2.01539	0.000515719
LOC_Os03g01020	6164.67	1755.94	1.8117	0.000516369
LOC_Os03g52720	37.9551	164.397	-2.11107	0.000516369
LOC_Os02g58210	1.38778e-17	21.5791	-7.44027	0.000516369
LOC_Os11g45180	20.4363	1.38778e-17	7.36255	0.000516369
LOC_Os07g49350	20.4363	1.38778e-17	7.36255	0.000516369
LOC_Os06g06980	955.746	3363.93	-1.81531	0.000523087
LOC_Os01g48610	178.106	654.499	-1.8769	0.000524042
LOC_Os01g71180	24.3294	114.051	-2.22294	0.000526257
LOC_Os11g07830	31.1423	2.05729	3.84243	0.000539634
LOC_Os01g06200	1.94421	30.8263	-3.90115	0.000539634
LOC_Os05g45954	73.966	13.3594	2.4583	0.000540716
LOC_Os05g25390	12.6502	73.98	-2.53593	0.000540716
LOC_Os04g21820	742.6	2614.91	-1.81592	0.000543749
LOC_Os02g09940	1092.98	305.16	1.84021	0.000551686
LOC_Os11g29290	25.3027	117.134	-2.20507	0.00055708
LOC_Os07g33780	632.621	2228.58	-1.8165	0.00055708
LOC_Os06g29380	987.863	3455.38	-1.80632	0.000564106
LOC_Os10g28640	228.715	56.513	2.01457	0.000573872
LOC_Os01g05060	354.267	92.4744	1.93632	0.00058016
LOC_Os07g14700	24.3294	113.024	-2.20989	0.000582737
LOC_Os10g40360	597.583	2099.12	-1.81235	0.000582737
LOC_Os06g09950	17.5165	88.3645	-2.32631	0.000582737
LOC_Os01g09370	813.649	226.045	1.84724	0.000589303
LOC_Os02g50374	0.970936	25.689	-4.55478	0.000594828
LOC_Os10g03900	32.1155	140.765	-2.1275	0.000594828
LOC_Os01g03340	50.6076	7.19459	2.79361	0.000594828
LOC_Os06g45950	10.7037	65.7602	-2.60475	0.000596131
LOC_Os04g32370	420.449	1483.67	-1.81885	0.000597809
LOC_Os07g10850	352.32	92.4744	1.92837	0.000597809
novel.137	77.8591	301.05	-1.9493	0.00059806
novel.496	46.7145	6.16713	2.89672	0.000611229
LOC_Os09g32250	46.7145	6.16713	2.89672	0.000611229
LOC_Os02g16070	76.8858	296.94	-1.9476	0.000611336
LOC_Os06g28194	573.252	157.205	1.86572	0.000615749
LOC_Os03g08600	137.228	30.8263	2.14995	0.000617651
LOC_Os06g38590	3.89077	39.0461	-3.28515	0.000618626
LOC_Os08g10244	1457.95	5043.84	-1.79049	0.000624915
LOC_Os10g33990	602.45	165.425	1.8639	0.000628465
LOC_Os06g15750	80.7789	310.298	-1.9399	0.00063007
LOC_Os10g39100	80.7789	310.298	-1.9399	0.00063007
LOC_Os05g49170	233.582	58.568	1.99351	0.00063007
LOC_Os01g61080	161.56	585.659	-1.85716	0.000638068
LOC_Os12g07270	118.736	25.689	2.20321	0.000643242
LOC_Os08g43550	283.218	1002.81	-1.82359	0.00064853
LOC_Os12g32986	3192.31	922.668	1.79058	0.000649899
LOC_Os01g19740	8733.12	2538.87	1.78226	0.000651614
LOC_Os05g39720	42.8215	177.754	-2.05019	0.000652959
LOC_Os01g55450	308.523	81.1722	1.92474	0.000654368
novel.718	69.0997	12.3319	2.47466	0.000657871
LOC_Os09g11170	69.0997	12.3319	2.47466	0.000657871
LOC_Os04g09920	79.8056	305.16	-1.93329	0.000669239
LOC_Os01g20206	21.4096	100.694	-2.22686	0.000670133
LOC_Os12g43580	197.571	704.845	-1.83426	0.000680614
LOC_Os02g01510	179.079	643.197	-1.84392	0.000686684
LOC_Os01g47610	145.988	33.9087	2.10217	0.00069413
novel.601	377.625	1318.24	-1.80324	0.000695194
LOC_Os06g04150	1218.53	348.314	1.80632	0.000695194
LOC_Os07g46846	397.091	1386.06	-1.80311	0.000695738
LOC_Os09g36600	10.7037	64.7328	-2.58208	0.000696512
LOC_Os09g24924	965.478	3318.72	-1.78118	0.000697583
LOC_Os12g26880	124.576	27.7439	2.16189	0.000702251
LOC_Os01g61630	124.576	27.7439	2.16189	0.000702251
LOC_Os05g02310	105.111	389.413	-1.8881	0.000705174
LOC_Os09g34920	30.169	2.05729	3.79681	0.000720544
LOC_Os02g14490	6.81059	50.3482	-2.8629	0.000721378
LOC_Os07g02570	6.81059	50.3482	-2.8629	0.000721378
LOC_Os02g33030	214.116	53.4306	2.00021	0.00072874
LOC_Os08g28030	127.496	28.7714	2.14304	0.000732931
LOC_Os01g10640	9.7304	61.6504	-2.64767	0.000738248
LOC_Os04g48710	537.241	148.985	1.84956	0.000740206
LOC_Os04g45690	50.6076	200.359	-1.98242	0.000741152
LOC_Os03g11734	249.154	876.432	-1.81407	0.000745229
LOC_Os08g42560	360.106	96.5843	1.89724	0.000745229
LOC_Os10g38780	960.612	3283.79	-1.7732	0.000745578
LOC_Os09g39260	60.3403	234.265	-1.95466	0.000745578
LOC_Os08g39660	5.83732	46.2383	-2.95843	0.000746957
LOC_Os10g02040	19.4631	1.38778e-17	7.2926	0.000746957
LOC_Os06g33170	19.4631	1.38778e-17	7.2926	0.000746957
LOC_Os03g62830	19.4631	1.38778e-17	7.2926	0.000746957
LOC_Os04g54740	19.4631	1.38778e-17	7.2926	0.000746957
novel.745	19.4631	1.38778e-17	7.2926	0.000746957
LOC_Os11g11650	1.38778e-17	20.5517	-7.3703	0.000746957
LOC_Os06g32730	19.4631	1.38778e-17	7.2926	0.000746957
LOC_Os11g32030	1.38778e-17	20.5517	-7.3703	0.000746957
LOC_Os06g11610	138.202	31.8538	2.11302	0.000746957
LOC_Os01g38530	32.1155	137.683	-2.09559	0.000746957
LOC_Os03g46660	382.492	103.777	1.88072	0.000757342
LOC_Os11g47000	121.656	443.868	-1.86621	0.000757485
LOC_Os10g41820	1198.09	345.231	1.79474	0.000766265
LOC_Os01g26280	81.7522	308.243	-1.91307	0.000766752
LOC_Os08g38086	1146.51	329.819	1.79712	0.000767508
LOC_Os03g44250	41.8482	5.13966	2.99578	0.000767768
LOC_Os11g44680	278.352	970.959	-1.80202	0.000768246
novel.196	169.346	602.098	-1.82923	0.000775359
LOC_Os10g33900	22.3829	102.749	-2.1922	0.000777606
LOC_Os05g15530	81.7522	15.4143	2.39779	0.000780786
LOC_Os11g29790	94.4046	348.314	-1.88202	0.0007831
LOC_Os12g03350	218.983	55.4856	1.97829	0.000793091
LOC_Os01g22900	1222.42	4146.86	-1.76217	0.000793091
LOC_Os04g45520	119.71	26.7165	2.15866	0.000799116
LOC_Os11g18830	25.3027	1.02984	4.46378	0.000813561
LOC_Os10g04730	2686.21	9062.27	-1.75425	0.000813851
LOC_Os08g30080	52.5542	8.22206	2.65836	0.000822129
LOC_Os08g37030	122.629	27.7439	2.13919	0.000833689
LOC_Os07g02330	86.6185	319.545	-1.88171	0.000843584
LOC_Os04g53000	290.031	1003.84	-1.79079	0.000843584
LOC_Os12g36400	1784.97	522.983	1.77083	0.000847523
LOC_Os01g62830	54.5007	211.661	-1.95488	0.000849371
LOC_Os11g43990	239.421	832.251	-1.79691	0.000853567
LOC_Os11g20330	101.217	368.863	-1.8643	0.00085488
LOC_Os11g03500	183.945	647.307	-1.81445	0.000862787
LOC_Os07g47420	277.379	73.98	1.90492	0.000863188
LOC_Os04g38680	60.3403	10.277	2.53963	0.000863188
LOC_Os01g56460	59.367	10.277	2.51622	0.000863188
LOC_Os02g05950	34.0621	142.82	-2.06382	0.000863975
LOC_Os05g48070	288.085	77.0624	1.90074	0.000864211
LOC_Os08g01240	72.0195	271.254	-1.91129	0.000871977
LOC_Os03g58750	56.4472	216.798	-1.93895	0.000881898
LOC_Os11g13870	16.5433	81.1722	-2.28587	0.000889416
LOC_Os02g10520	51.5809	200.359	-1.955	0.000889416
novel.60	13.6235	73.98	-2.43002	0.000889416
LOC_Os03g61670	111.923	24.6615	2.17666	0.000889416
LOC_Os09g31486	680.311	195.221	1.80045	0.000923377
LOC_Os02g49510	131.389	30.8263	2.08727	0.000926615
LOC_Os02g16709	205.357	52.4032	1.96793	0.000929007
LOC_Os08g13440	91.4848	332.902	-1.86202	0.000929007
LOC_Os07g38630	353.294	96.5843	1.8697	0.000929007
LOC_Os01g08020	2971.38	9911.98	-1.738	0.000929007
LOC_Os01g38359	735.787	2479.28	-1.75238	0.000932
LOC_Os11g06234	29.1957	125.353	-2.09731	0.000943106
LOC_Os11g40460	32.1155	135.628	-2.07391	0.000955565
LOC_Os01g02440	1.94421	28.7714	-3.80203	0.000956145
LOC_Os01g47830	1.94421	28.7714	-3.80203	0.000956145
LOC_Os01g63690	45.7413	181.864	-1.98826	0.000956916
LOC_Os12g40380	40.8749	5.13966	2.96194	0.00096437
LOC_Os10g30560	415.583	1406.61	-1.75869	0.000975879
LOC_Os10g17100	130.415	461.335	-1.82168	0.000977676
LOC_Os06g09880	184.918	47.2658	1.96527	0.000977676
LOC_Os05g26020	93.4314	19.5242	2.25157	0.000979362
LOC_Os01g19460	93.4314	19.5242	2.25157	0.000979362
LOC_Os03g46270	25.3027	110.969	-2.12715	0.000979866
LOC_Os11g45190	25.3027	110.969	-2.12715	0.000979866
LOC_Os12g35340	434.075	122.271	1.82684	0.000987463
LOC_Os06g15910	129.442	457.225	-1.81957	0.000992684
LOC_Os02g50640	36.9819	4.1122	3.1314	0.000993116
LOC_Os08g41780	36.9819	4.1122	3.1314	0.000993116
LOC_Os11g26880	33.0888	3.08475	3.37242	0.000998184
LOC_Os06g13180	2.91749	32.8813	-3.43824	0.000998184
LOC_Os10g04490	39.9017	161.315	-2.01186	0.00101441
LOC_Os02g15750	6094.59	1838.14	1.72922	0.00101744
LOC_Os04g52250	753.306	218.853	1.78271	0.00102378
LOC_Os03g13560	426.289	120.216	1.82516	0.00102379
LOC_Os02g34580	315.336	1069.6	-1.76169	0.00103363
LOC_Os03g02750	107.057	23.6341	2.17369	0.00104177
LOC_Os07g35020	279.325	76.0349	1.87554	0.00104315
LOC_Os05g02200	468.139	132.546	1.81951	0.00104924
LOC_Os07g27980	27.2492	117.134	-2.09866	0.00105193
LOC_Os06g17980	6.81059	48.2933	-2.80293	0.00105974
LOC_Os09g15670	754.279	219.88	1.77782	0.00105974
LOC_Os03g60380	166.426	42.1285	1.97892	0.00105974
LOC_Os03g13450	146.961	35.9637	2.02716	0.00105997
LOC_Os05g47770	36.0086	146.93	-2.02483	0.00105997
LOC_Os09g25100	100.244	21.5791	2.20946	0.00106296
LOC_Os01g59150	100.244	21.5791	2.20946	0.00106296
LOC_Os03g28289	100.244	21.5791	2.20946	0.00106296
LOC_Os08g23754	82.7254	16.4418	2.32246	0.0010631
LOC_Os11g06720	19486.7	5920.27	1.71874	0.0010646
LOC_Os02g54640	309.497	1045.96	-1.75641	0.00106503
LOC_Os04g49370	69.0997	255.842	-1.88654	0.00107713
LOC_Os03g21080	648.193	2157.68	-1.73479	0.00108648
LOC_Os01g42210	18.4898	1.38778e-17	7.21908	0.00108777
LOC_Os06g22370	1.38778e-17	19.5242	-7.29676	0.00108777
LOC_Os02g05744	207.304	708.955	-1.77331	0.00109402
LOC_Os03g10320	69.0997	13.3594	2.36029	0.00109741
LOC_Os05g13940	1862.83	558.945	1.7365	0.00109741
LOC_Os05g02420	1524.13	5022.26	-1.72026	0.00109741
LOC_Os11g40930	80.7789	294.886	-1.86643	0.00109815
LOC_Os02g18940	238.448	63.7053	1.90218	0.0010991
LOC_Os04g53780	62.2868	11.3045	2.44941	0.00110099
LOC_Os10g18370	2089.6	6872.73	-1.71759	0.00110099
LOC_Os11g32270	228.715	60.6229	1.91351	0.00110354
novel.92	26.2759	113.024	-2.09941	0.00110623
LOC_Os01g53420	65.2066	242.485	-1.89272	0.00111246
LOC_Os03g33090	24.3294	1.02984	4.40748	0.00111667
LOC_Os12g30520	24.3294	1.02984	4.40748	0.00111667
LOC_Os04g27010	0.970936	23.6341	-4.4351	0.00111667
LOC_Os02g13150	177.132	609.291	-1.78156	0.00111926
LOC_Os12g25090	43.7947	6.16713	2.80387	0.00111926
LOC_Os01g48710	5.83732	44.1834	-2.89302	0.00111926
LOC_Os07g44330	18596.2	60827.1	-1.7097	0.00112525
LOC_Os09g39050	27.2492	116.106	-2.08596	0.00114032
LOC_Os10g41710	1417.07	424.346	1.73931	0.0011546
LOC_Os03g48270	694.91	2298.45	-1.72557	0.0011546
LOC_Os06g37620	127.496	443.868	-1.79864	0.00115609
LOC_Os03g13050	183.945	629.84	-1.77499	0.00115891
LOC_Os03g45400	691.99	202.413	1.77284	0.00115891
LOC_Os05g05640	65.2066	241.457	-1.8866	0.00116103
LOC_Os06g35850	14.5967	71.925	-2.29079	0.00116103
LOC_Os04g36800	139.175	33.9087	2.03328	0.00116103
LOC_Os02g13360	276.405	76.0349	1.86039	0.00116103
LOC_Os06g16980	538.214	156.177	1.7842	0.00117119
LOC_Os07g08729	280.299	77.0624	1.86123	0.00117431
LOC_Os11g47870	100.244	355.506	-1.82502	0.00118016
LOC_Os05g30454	73.966	270.226	-1.86741	0.00118333
LOC_Os09g30454	353.294	1179.54	-1.73891	0.00118341
LOC_Os03g04340	419.476	120.216	1.80192	0.00118586
LOC_Os11g07670	154.747	534.286	-1.78684	0.00118586
LOC_Os11g47570	39.9017	5.13966	2.92728	0.00118586
LOC_Os06g51210	4.86405	40.0735	-3.00958	0.00118586
LOC_Os04g10924	2446.79	742.861	1.71956	0.00118902
LOC_Os01g48360	120.683	423.319	-1.80942	0.00119217
LOC_Os12g01950	465.219	133.573	1.79935	0.00120319
LOC_Os02g04650	776.665	230.155	1.75415	0.00120744
LOC_Os05g48210	258.887	871.295	-1.75033	0.00121134
LOC_Os03g50100	92.4581	327.764	-1.82434	0.00121171
LOC_Os11g02660	366.919	103.777	1.82078	0.00121389
LOC_Os09g23110	1986.43	603.126	1.71945	0.00122044
LOC_Os03g64150	408.77	117.134	1.80207	0.00122388
LOC_Os08g14600	51.5809	194.194	-1.90995	0.00122548
LOC_Os01g63050	180.052	613.401	-1.76768	0.00124008
novel.134	18.4898	85.2821	-2.19769	0.00124406
LOC_Os03g51230	36.0086	4.1122	3.09306	0.00124484
LOC_Os08g44410	3.89077	35.9637	-3.1669	0.00124484
LOC_Os07g48760	3.89077	35.9637	-3.1669	0.00124484
LOC_Os12g34854	68.1264	13.3594	2.33987	0.00125157
LOC_Os11g05180	28.2225	2.05729	3.70101	0.00125157
LOC_Os09g15580	28.2225	2.05729	3.70101	0.00125157
LOC_Os03g50780	28.2225	2.05729	3.70101	0.00125157
LOC_Os10g42110	28.2225	2.05729	3.70101	0.00125157
LOC_Os03g17174	185.892	630.867	-1.76217	0.00126962
LOC_Os03g10640	54.5007	203.441	-1.89777	0.0012784
LOC_Os01g66860	2.91749	31.8538	-3.39261	0.0012784
LOC_Os01g32364	682.258	201.386	1.75974	0.00128418
LOC_Os04g17669	8.75713	54.4581	-2.61905	0.00128418
LOC_Os01g02430	8.75713	54.4581	-2.61905	0.00128418
LOC_Os06g38110	8.75713	54.4581	-2.61905	0.00128418
LOC_Os09g17329	87.5918	18.4967	2.23608	0.0012906
LOC_Os07g09190	541.134	1776.49	-1.71474	0.00129434
LOC_Os09g24580	208.277	699.708	-1.74762	0.00131538
LOC_Os03g39610	166866	51766.9	1.68858	0.00131951
LOC_Os11g02540	26.2759	110.969	-2.07297	0.00132016
LOC_Os02g50140	40.8749	160.287	-1.96799	0.00133048
LOC_Os07g35290	49.6343	185.974	-1.90295	0.00133099
LOC_Os01g20830	954.772	3099.87	-1.69885	0.00133133
LOC_Os04g51300	3544.63	1093.23	1.69693	0.00133914
LOC_Os02g51750	1334.35	405.852	1.71681	0.00135631
LOC_Os03g20640	1321.69	401.742	1.71774	0.00135717
LOC_Os02g34810	13941.1	4328.72	1.6873	0.00135889
LOC_Os03g56840	452.567	131.518	1.78193	0.00137431
LOC_Os07g39740	498.31	145.903	1.77119	0.00137431
LOC_Os02g30540	61.3136	223.99	-1.86696	0.00139529
LOC_Os12g33610	155.72	40.0735	1.95501	0.00140284
LOC_Os07g49110	22758.9	7090.56	1.68244	0.0014038
LOC_Os10g19334	7.78386	50.3482	-2.6735	0.00140848
LOC_Os07g46600	184.918	49.3207	1.90403	0.00141385
LOC_Os08g10470	107.057	24.6615	2.1126	0.00141527
LOC_Os05g04584	2051.64	6597.37	-1.68505	0.0014162
LOC_Os03g12450	348.427	99.6667	1.80443	0.0014191
LOC_Os06g35730	274.459	77.0624	1.83087	0.00142531
LOC_Os08g41720	81.7522	290.776	-1.82894	0.00142857
LOC_Os05g49800	7028.93	2188.51	1.6833	0.00143262
LOC_Os06g09679	1717.81	528.121	1.70141	0.00144246
LOC_Os12g40010	30.169	123.298	-2.02638	0.00145878
LOC_Os12g11980	16.5433	77.0624	-2.21102	0.00145999
LOC_Os03g08999	260.833	863.075	-1.72586	0.00145999
LOC_Os04g37490	285.165	939.108	-1.71904	0.00147374
LOC_Os07g38230	302.684	86.3096	1.80878	0.00147422
LOC_Os06g03980	38.9284	5.13966	2.89177	0.0014829
LOC_Os08g40160	4047.81	1260.71	1.68282	0.0014829
LOC_Os02g44880	102.191	354.479	-1.79314	0.0014829
LOC_Os05g35410	815.595	2629.29	-1.68859	0.00148451
LOC_Os01g16750	125.549	30.8263	2.02175	0.00148451
LOC_Os08g04500	37339.4	119118	-1.67362	0.00148451
LOC_Os05g13370	167.4	44.1834	1.91882	0.00148452
LOC_Os08g01150	1246.75	3998.91	-1.68133	0.00149631
LOC_Os01g49614	292.951	961.712	-1.7145	0.0015157
LOC_Os02g40240	26472.8	84313	-1.67124	0.0015157
LOC_Os08g25624	103.164	23.6341	2.12031	0.00151596
LOC_Os02g41590	738.707	2380.64	-1.6881	0.00153215
LOC_Os05g01140	2329.02	723.34	1.68682	0.00153215
LOC_Os05g47840	23.3561	1.02984	4.3489	0.00153602
LOC_Os05g28970	23.3561	1.02984	4.3489	0.00153602
LOC_Os09g20460	240.395	792.18	-1.71988	0.00153829
LOC_Os11g12300	78.8324	279.474	-1.82416	0.00156701
LOC_Os01g22000	17.5165	1.38778e-17	7.14162	0.00157245
LOC_Os02g12020	1.38778e-17	18.4967	-7.21926	0.00157245
LOC_Os07g31010	1.38778e-17	18.4967	-7.21926	0.00157245
LOC_Os01g49560	54.5007	199.331	-1.86834	0.00158382
LOC_Os03g52990	35.0353	4.1122	3.05367	0.00158465
LOC_Os04g37970	3.89077	34.9362	-3.12522	0.00158465
LOC_Os03g55330	63.2601	12.3319	2.34752	0.00158487
LOC_Os04g51880	2439	760.328	1.68144	0.00158487
LOC_Os01g09430	2012.71	625.73	1.68534	0.00159423
LOC_Os04g02030	35.0353	137.683	-1.97052	0.00159423
LOC_Os06g13320	288.085	82.1997	1.80777	0.00159423
LOC_Os11g43750	157.667	529.148	-1.74596	0.00160443
LOC_Os01g40820	220.929	60.6229	1.86356	0.00160443
LOC_Os01g11860	164.48	548.67	-1.73724	0.00160443
LOC_Os03g47610	111.923	26.7165	2.06174	0.00162394
LOC_Os11g06150	85.6452	18.4967	2.20371	0.00162394
LOC_Os08g17870	97.3244	334.957	-1.78175	0.00162986
LOC_Os02g17780	261.806	73.98	1.8216	0.00162986
LOC_Os09g30462	31.1423	3.08475	3.2853	0.00166333
LOC_Os06g36910	31.1423	3.08475	3.2853	0.00166333
LOC_Os07g06790	2.91749	30.8263	-3.34549	0.00166333
LOC_Os03g04169	2639.5	827.114	1.67396	0.00166338
LOC_Os01g71720	290.031	83.2272	1.79959	0.00166633
LOC_Os03g04190	27.2492	2.05729	3.65061	0.00167535
LOC_Os11g31530	72.0195	254.814	-1.82114	0.00167577
LOC_Os07g34980	5.83732	42.1285	-2.8245	0.0016873
LOC_Os06g08680	7.78386	49.3207	-2.64383	0.00168754
LOC_Os01g56080	56.4472	204.468	-1.85452	0.00169773
LOC_Os07g02140	260.833	73.98	1.81623	0.00169915
LOC_Os07g42354	155.72	41.101	1.91859	0.0017388
LOC_Os02g34990	149.881	500.379	-1.73834	0.00174339
LOC_Os02g49710	36.0086	139.738	-1.95249	0.00174768
LOC_Os05g46420	108.03	25.689	2.06704	0.00174768
LOC_Os07g38250	14.5967	68.8426	-2.22771	0.00174768
LOC_Os12g17910	4353.42	1376.81	1.66073	0.0017481
LOC_Os04g12010	179.079	590.796	-1.72134	0.00174852
LOC_Os09g29600	164.48	543.533	-1.72367	0.00178196
LOC_Os06g21240	129.442	32.8813	1.97302	0.00181312
LOC_Os09g03380	680.311	207.551	1.71215	0.00182222
LOC_Os08g05690	19.4631	85.2821	-2.12418	0.00183462
LOC_Os01g48620	354.267	1136.38	-1.68118	0.00185489
LOC_Os12g41660	62.2868	12.3319	2.3252	0.0018549
novel.534	62.2868	12.3319	2.3252	0.0018549
LOC_Os07g42610	236.502	66.7877	1.82232	0.00185706
LOC_Os03g16080	261.806	75.0074	1.80174	0.00186842
LOC_Os04g37980	47.6878	176.727	-1.88699	0.00187759
LOC_Os01g66130	69.0997	243.512	-1.81532	0.00187916
novel.738	44.768	7.19459	2.61719	0.00187916
LOC_Os02g12250	6.81059	45.2109	-2.70802	0.00187916
LOC_Os07g33580	20.4363	88.3645	-2.10538	0.00187916
LOC_Os11g17350	20.4363	88.3645	-2.10538	0.00187916
LOC_Os04g12600	137.228	455.17	-1.72888	0.00193052
LOC_Os12g04220	230.662	747.999	-1.6967	0.00194007
LOC_Os01g53810	963.532	3025.89	-1.65083	0.0019504
LOC_Os02g50470	168.373	550.725	-1.7089	0.00196181
LOC_Os02g12420	69.0997	242.485	-1.80922	0.00197103
LOC_Os12g42420	634.568	2001.51	-1.65704	0.00197589
LOC_Os12g02540	88.565	301.05	-1.76371	0.00199793
LOC_Os04g15690	1084.22	3394.76	-1.64654	0.00199793
LOC_Os03g53010	113.87	382.22	-1.74587	0.00199793
LOC_Os06g08090	153.774	41.101	1.90046	0.00199922
LOC_Os04g39140	154.747	509.626	-1.71869	0.00202811
LOC_Os02g27300	50.6076	181.864	-1.84279	0.00202859
LOC_Os07g31250	50.6076	181.864	-1.84279	0.00202859
LOC_Os07g48770	58.3938	207.551	-1.82729	0.00202859
LOC_Os10g28340	657.926	202.413	1.70003	0.00202859
novel.15	34.0621	4.1122	3.01317	0.0020336
LOC_Os02g52180	34.0621	4.1122	3.01317	0.0020336
LOC_Os05g25260	234.555	66.7877	1.81041	0.00203363
LOC_Os12g41930	377.625	113.024	1.73925	0.0020444
LOC_Os11g43860	1637.03	5101.38	-1.63973	0.0020444
LOC_Os11g40009	47.6878	8.22206	2.51853	0.0020444
LOC_Os07g20135	47.6878	8.22206	2.51853	0.0020444
LOC_Os05g15510	1019.98	319.545	1.67408	0.00205164
LOC_Os09g35630	36.9819	140.765	-1.9247	0.00205164
LOC_Os06g48650	141.121	36.9911	1.92821	0.00205164
LOC_Os10g35540	10.7037	58.568	-2.43798	0.00205891
LOC_Os10g42780	809.756	2537.85	-1.64789	0.00205891
LOC_Os06g28630	411.69	1303.86	-1.66285	0.00207136
LOC_Os01g62980	71.0462	14.3869	2.29434	0.00208636
LOC_Os01g73450	4428.36	1423.05	1.63771	0.00209003
LOC_Os04g37500	40.8749	6.16713	2.70462	0.00209003
LOC_Os05g44630	38.9284	146.93	-1.91273	0.00209003
LOC_Os01g14590	93.4314	315.435	-1.75396	0.00209465
LOC_Os11g40450	203.41	655.527	-1.68763	0.00212547
LOC_Os01g37460	1233.13	389.413	1.66264	0.00212547
LOC_Os09g20020	150.854	494.214	-1.71112	0.00213263
LOC_Os11g26860	3008.36	9312.97	-1.63022	0.00214377
LOC_Os01g34610	22.3829	1.02984	4.28783	0.00214377
LOC_Os01g41030	73.966	15.4143	2.25364	0.00214907
LOC_Os04g44150	61.3136	12.3319	2.30252	0.0021533
LOC_Os06g10990	11.6769	61.6504	-2.38768	0.0021533
LOC_Os03g37840	1128.99	3506.75	-1.63499	0.00216253
LOC_Os06g05430	134.309	34.9362	1.93907	0.00216253
LOC_Os12g12560	6254.21	19315.4	-1.62683	0.00216253
LOC_Os01g05820	30.169	3.08475	3.23968	0.00216886
LOC_Os01g57700	2.91749	29.7989	-3.29679	0.00216886
LOC_Os06g24430	30.169	3.08475	3.23968	0.00216886
LOC_Os06g39480	30.169	3.08475	3.23968	0.00216886
LOC_Os11g34590	2.91749	29.7989	-3.29679	0.00216886
LOC_Os09g39740	116.79	388.385	-1.73246	0.00217039
LOC_Os05g46770	286.138	84.2547	1.76243	0.00217039
LOC_Os01g55610	92.4581	21.5791	2.09297	0.00217557
LOC_Os04g37740	167.4	542.505	-1.69557	0.00218399
LOC_Os03g56270	117.763	29.7989	1.97819	0.00222062
LOC_Os10g37720	243.314	774.713	-1.67031	0.00222966
LOC_Os01g18050	64.2334	13.3594	2.25514	0.00223367
LOC_Os01g73940	2499.35	803.482	1.63707	0.00223521
LOC_Os05g44610	26.2759	2.05729	3.59838	0.00224449
LOC_Os11g04900	26.2759	2.05729	3.59838	0.00224449
LOC_Os04g23630	1.94421	25.689	-3.63928	0.00224449
LOC_Os01g12290	1.94421	25.689	-3.63928	0.00224449
LOC_Os11g37700	1.94421	25.689	-3.63928	0.00224449
LOC_Os12g10740	1211.71	3747.18	-1.62865	0.00224785
LOC_Os09g19940	325.069	96.5843	1.74962	0.00225506
LOC_Os06g04280	551.84	1723.07	-1.64243	0.00225904
LOC_Os06g01250	4008.88	12333.7	-1.6213	0.00226257
LOC_Os03g50870	8252.33	2679.64	1.62272	0.00226257
LOC_Os08g32060	43.7947	7.19459	2.58557	0.00227447
LOC_Os03g05640	6.81059	44.1834	-2.67495	0.00227447
LOC_Os12g11620	9.7304	54.4581	-2.46908	0.00229307
LOC_Os12g13290	1159.16	368.863	1.6516	0.00229426
LOC_Os11g19240	190.758	613.401	-1.68441	0.00229426
LOC_Os01g19480	14.5967	66.7877	-2.18406	0.00229426
LOC_Os09g07440	16.5433	1.38778e-17	7.05975	0.00229426
LOC_Os04g54520	1.38778e-17	17.4693	-7.13737	0.00229426
LOC_Os07g02674	1.38778e-17	17.4693	-7.13737	0.00229426
LOC_Os11g39420	1.38778e-17	17.4693	-7.13737	0.00229426
LOC_Os11g08210	2491.56	803.482	1.63257	0.00229751
LOC_Os07g46060	239.421	760.328	-1.66654	0.00229751
LOC_Os04g44050	36.9819	5.13966	2.81801	0.00230317
LOC_Os01g12580	36.9819	5.13966	2.81801	0.00230317
LOC_Os07g03870	372.759	1170.29	-1.65021	0.00231478
LOC_Os03g19570	108.03	26.7165	2.01073	0.0023242
LOC_Os03g46310	85.6452	19.5242	2.12622	0.00232441
LOC_Os02g18070	722.162	2237.83	-1.63153	0.00232441
LOC_Os08g42390	59.367	207.551	-1.8035	0.00233297
LOC_Os12g06410	115.816	382.22	-1.72144	0.00233432
LOC_Os08g04470	211.197	672.994	-1.6714	0.00233432
LOC_Os04g47780	446.727	1395.3	-1.64283	0.00233954
LOC_Os04g51404	36.9819	138.71	-1.90351	0.00233954
LOC_Os12g39620	951.853	2935.48	-1.62465	0.00234153
LOC_Os10g36170	70.073	14.3869	2.27448	0.00234912
LOC_Os09g30270	70.073	14.3869	2.27448	0.00234912
LOC_Os08g08440	142.095	38.0186	1.89872	0.00235323
LOC_Os01g18670	361.08	1131.24	-1.64717	0.00235344
LOC_Os06g41120	354.267	106.859	1.72799	0.00235344
LOC_Os04g12480	88.565	20.5517	2.10097	0.00235344
LOC_Os10g28350	56.4472	11.3045	2.30769	0.00237513
LOC_Os03g46290	10.7037	57.5405	-2.4125	0.00237513
LOC_Os09g23420	10.7037	57.5405	-2.4125	0.00237513
LOC_Os05g38530	5527.18	1802.18	1.61673	0.00238077
LOC_Os02g36280	30.169	117.134	-1.95246	0.00238077
LOC_Os07g04130	30.169	117.134	-1.95246	0.00238077
LOC_Os09g25060	591.744	184.946	1.67722	0.00238077
LOC_Os02g32450	377.625	115.079	1.71328	0.00238128
LOC_Os10g02340	40.8749	151.04	-1.88233	0.00238849
LOC_Os09g34330	190.758	53.4306	1.83366	0.00239178
LOC_Os01g16290	790.29	249.677	1.66184	0.00239667
LOC_Os06g49190	46.7145	8.22206	2.48886	0.00241511
LOC_Os10g20510	306.577	91.4469	1.74391	0.00243549
LOC_Os03g10460	60.3403	12.3319	2.27948	0.00246836
LOC_Os07g44640	60.3403	12.3319	2.27948	0.00246836
LOC_Os11g06780	80.7789	273.309	-1.75686	0.00247367
LOC_Os06g46140	326.042	1019.25	-1.64399	0.0024793
LOC_Os08g04840	1440.43	4399.62	-1.61079	0.00252444
LOC_Os10g05230	72.0195	245.567	-1.76783	0.00253397
LOC_Os03g20090	107.057	26.7165	1.99768	0.00253966
LOC_Os07g15440	1189.33	383.248	1.63349	0.00254022
LOC_Os01g08130	39.9017	6.16713	2.66996	0.00254283
LOC_Os02g44090	39.9017	6.16713	2.66996	0.00254283
LOC_Os04g54020	334.801	1043.91	-1.64024	0.00254283
LOC_Os02g38750	33.0888	4.1122	2.9715	0.00254574
LOC_Os07g03990	12.6502	62.6778	-2.29718	0.00254574
LOC_Os09g37320	12.6502	62.6778	-2.29718	0.00254574
LOC_Os10g40060	1069.62	3269.4	-1.61182	0.00254574
LOC_Os03g49730	109.977	27.7439	1.98226	0.00255181
LOC_Os01g17240	4807.93	1578.19	1.60707	0.00257949
LOC_Os09g29830	155.72	43.1559	1.84841	0.0025812
LOC_Os04g56760	284.192	85.2821	1.73512	0.00258407
LOC_Os09g23430	20.4363	85.2821	-2.05423	0.00258544
LOC_Os04g09580	248.181	777.795	-1.64749	0.00260514
LOC_Os01g61044	910.975	291.803	1.64201	0.00261444
LOC_Os06g05710	13.6235	65.7602	-2.2604	0.00261789
LOC_Os02g18090	323.122	97.6117	1.72571	0.00262799
LOC_Os07g02150	124.576	32.8813	1.91779	0.00264452
LOC_Os01g38190	33.0888	125.353	-1.91746	0.00264452
LOC_Os07g43470	812.675	259.952	1.64398	0.00265183
LOC_Os03g18270	264.726	79.1173	1.74089	0.00266274
LOC_Os03g01442	185.892	52.4032	1.82435	0.00266274
LOC_Os01g65992	9.7304	53.4306	-2.44166	0.00268368
LOC_Os10g07160	96.3512	23.6341	2.02187	0.00271555
LOC_Os09g39650	253.047	790.125	-1.64217	0.0027239
LOC_Os03g16170	822.408	264.061	1.63853	0.0027305
LOC_Os07g41960	6.81059	43.1559	-2.6411	0.00275402
LOC_Os01g72780	242.341	71.925	1.75077	0.00275683
LOC_Os03g44540	407.796	1256.6	-1.62329	0.00276441
LOC_Os02g49480	79.8056	267.144	-1.74142	0.00277977
LOC_Os06g38960	17.5165	75.0074	-2.09023	0.00279021
LOC_Os02g13510	11833	35637.7	-1.59058	0.00279021
LOC_Os04g52990	86.6185	285.638	-1.71995	0.00279021
LOC_Os03g16440	492.471	155.15	1.66561	0.0027931
novel.74	2.91749	28.7714	-3.24637	0.00279484
LOC_Os03g46600	29.1957	3.08475	3.19257	0.00279484
LOC_Os04g49170	2.91749	28.7714	-3.24637	0.00279484
LOC_Os05g02030	29.1957	3.08475	3.19257	0.00279484
LOC_Os02g53100	2.91749	28.7714	-3.24637	0.00279484
LOC_Os04g37820	52.5542	181.864	-1.78847	0.00280813
LOC_Os11g05930	206.33	646.279	-1.64659	0.00281442
LOC_Os11g07850	649.167	1977.88	-1.6071	0.00281607
LOC_Os06g47800	77.8591	17.4693	2.14831	0.0028205
LOC_Os11g34660	18.4898	78.0898	-2.07078	0.0028205
LOC_Os08g39370	6694.13	2219.33	1.59272	0.00282077
LOC_Os08g32690	518.749	163.37	1.66617	0.00284839
LOC_Os08g10070	167.4	528.121	-1.65681	0.00284839
LOC_Os11g07930	781.531	2372.43	-1.60183	0.00284967
LOC_Os03g28940	866.205	2627.24	-1.60062	0.00285122
LOC_Os02g04230	644.3	1960.41	-1.60516	0.00285761
LOC_Os07g46870	72.9928	245.567	-1.7485	0.00286261
LOC_Os09g25784	36.0086	5.13966	2.77967	0.00286367
LOC_Os03g46930	4.86405	35.9637	-2.85397	0.00286367
LOC_Os07g43370	326.042	99.6667	1.70866	0.00289037
LOC_Os12g14440	136.255	36.9911	1.87763	0.00289212
LOC_Os03g24844	139.175	38.0186	1.86879	0.00289958
LOC_Os01g47580	7.78386	46.2383	-2.55096	0.00290753
LOC_Os02g01350	145.014	40.0735	1.85233	0.00291236
LOC_Os11g34750	86.6185	20.5517	2.06895	0.00291399
LOC_Os08g01430	40.8749	147.958	-1.85261	0.00291454
LOC_Os10g27360	20.4363	1.02984	4.15735	0.00291454
novel.795	20.4363	1.02984	4.15735	0.00291454
LOC_Os03g43540	20.4363	1.02984	4.15735	0.00291454
LOC_Os09g27990	20.4363	1.02984	4.15735	0.00291454
LOC_Os01g41770	0.970936	21.5791	-4.30457	0.00291454
LOC_Os10g05120	20.4363	1.02984	4.15735	0.00291454
LOC_Os07g42104	0.970936	21.5791	-4.30457	0.00291454
LOC_Os06g20800	0.970936	21.5791	-4.30457	0.00291454
LOC_Os03g48920	1310.99	428.456	1.61316	0.00292452
LOC_Os03g43860	25.3027	2.05729	3.5442	0.00296242
LOC_Os01g43100	240.395	71.925	1.73914	0.00297455
LOC_Os08g39830	65.2066	14.3869	2.17083	0.00299562
LOC_Os10g05290	105.111	26.7165	1.97124	0.00303038
LOC_Os08g44470	383.465	120.216	1.67247	0.00305876
LOC_Os06g33520	116.79	30.8263	1.91752	0.00307856
LOC_Os08g43490	80.7789	267.144	-1.72396	0.00310953
LOC_Os05g25350	376.652	1148.71	-1.60838	0.00312375
LOC_Os03g08320	39.9017	143.848	-1.84666	0.00312735
LOC_Os07g43310	213.143	62.6778	1.76384	0.00312914
LOC_Os02g16670	152.801	43.1559	1.82113	0.00312914
LOC_Os02g17330	203.41	59.5954	1.76906	0.00312914
LOC_Os02g17760	158.64	45.2109	1.80826	0.00312986
LOC_Os12g41124	185.892	53.4306	1.7964	0.00313
LOC_Os06g21380	3693.54	11013.4	-1.57615	0.00313792
LOC_Os01g51540	284.192	871.295	-1.61585	0.00315506
LOC_Os06g29730	1599.07	4771.56	-1.57715	0.00321849
LOC_Os03g02460	32.1155	4.1122	2.9286	0.00325842
LOC_Os03g55350	32.1155	4.1122	2.9286	0.00325842
LOC_Os03g24990	32.1155	4.1122	2.9286	0.00325842
LOC_Os05g32440	10.7037	55.4856	-2.36015	0.00327411
LOC_Os05g01030	368.866	1119.94	-1.60192	0.00328657
LOC_Os12g42280	187.838	54.4581	1.784	0.00332154
LOC_Os07g29410	7312.15	2461.81	1.57053	0.00333143
LOC_Os08g40990	28.2225	106.859	-1.91596	0.00335207
LOC_Os04g35530	107.057	27.7439	1.94349	0.00335207
LOC_Os02g48100	154.747	44.1834	1.80552	0.00335297
LOC_Os09g38330	151.827	43.1559	1.81191	0.00335385
LOC_Os02g32550	41.8482	7.19459	2.52018	0.0033548
LOC_Os07g42650	6.81059	42.1285	-2.60644	0.0033548
LOC_Os01g68960	115.816	30.8263	1.90546	0.00335573
novel.405	15.57	1.38778e-17	6.97297	0.00336037
LOC_Os07g47480	15.57	1.38778e-17	6.97297	0.00336037
LOC_Os03g58850	15.57	1.38778e-17	6.97297	0.00336037
LOC_Os01g04440	1.38778e-17	16.4418	-7.05055	0.00336037
LOC_Os02g29040	1.38778e-17	16.4418	-7.05055	0.00336037
LOC_Os04g36890	258.887	79.1173	1.70873	0.00336273
LOC_Os01g63854	1005.38	2991.99	-1.57324	0.00341245
LOC_Os08g32930	61.3136	13.3594	2.18816	0.00341245
LOC_Os01g02700	430.182	1295.64	-1.59036	0.00344423
LOC_Os03g17730	937.254	309.27	1.5992	0.00348354
LOC_Os06g02600	331.882	103.777	1.67604	0.00349915
LOC_Os01g06790	260.833	795.262	-1.60782	0.00350403
LOC_Os01g02490	372.759	1125.08	-1.59338	0.00350605
LOC_Os11g32260	1551.38	517.846	1.58274	0.00351068
LOC_Os02g05910	53.5274	180.837	-1.75389	0.00351068
LOC_Os08g42268	67.1532	14.3869	2.21319	0.00351176
LOC_Os11g39670	496.364	160.287	1.63	0.00351176
LOC_Os03g17790	44.768	8.22206	2.42763	0.00351828
LOC_Os11g36400	7.78386	45.2109	-2.51863	0.00351828
LOC_Os04g33390	176.159	544.56	-1.6275	0.00351923
LOC_Os11g17380	73.966	243.512	-1.71731	0.00353411
LOC_Os08g38400	16.5433	69.8701	-2.06991	0.00354382
LOC_Os03g13850	159.613	46.2383	1.78475	0.0035492
LOC_Os09g25610	109.977	349.341	-1.66628	0.00356234
LOC_Os03g51459	72.9928	16.4418	2.14218	0.00357224
LOC_Os08g09840	869.125	2579.97	-1.56958	0.00359235
LOC_Os08g38900	2010.77	5928.49	-1.55986	0.00362045
LOC_Os01g16620	34.0621	124.326	-1.86393	0.00363402
LOC_Os09g17630	338.695	1021.31	-1.59199	0.00364149
LOC_Os05g38670	47.6878	9.24952	2.35101	0.00365374
LOC_Os05g46240	96.3512	24.6615	1.96079	0.00365374
LOC_Os09g04680	2.91749	27.7439	-3.19414	0.00365374
novel.182	28.2225	3.08475	3.14388	0.00365374
novel.805	28.2225	3.08475	3.14388	0.00365374
LOC_Os01g65060	2.91749	27.7439	-3.19414	0.00365374
LOC_Os05g27050	144.041	447.978	-1.63607	0.00365374
LOC_Os01g62900	670.578	219.88	1.60816	0.00366199
LOC_Os08g31630	3513.49	1191.86	1.55959	0.00373274
LOC_Os09g03630	622.888	203.441	1.61379	0.00373274
novel.359	50.6076	171.589	-1.75894	0.00373274
LOC_Os11g44580	50.6076	171.589	-1.75894	0.00373274
LOC_Os01g71330	364.973	116.106	1.65132	0.00373274
LOC_Os01g09880	9.7304	51.3757	-2.38521	0.00375433
LOC_Os01g52140	50.6076	10.277	2.28644	0.00375433
LOC_Os02g15540	481.765	156.177	1.62439	0.00375433
LOC_Os06g40440	4064.36	1381.95	1.55624	0.00378669
LOC_Os06g34830	10.7037	54.4581	-2.33324	0.00384884
LOC_Os03g12260	1153.32	3390.65	-1.55566	0.00384948
LOC_Os11g04030	451.593	1341.88	-1.57088	0.00387613
LOC_Os09g09520	1055.02	3100.9	-1.5553	0.00388793
LOC_Os09g09930	3933.94	1340.85	1.55274	0.00390398
LOC_Os03g46060	526.535	171.589	1.61689	0.00390944
LOC_Os08g16330	56.4472	12.3319	2.18348	0.0039112
LOC_Os01g26310	11.6769	57.5405	-2.28835	0.0039112
LOC_Os07g02940	263.753	82.1997	1.68053	0.00391554
LOC_Os12g25180	1929.01	652.444	1.56376	0.00392715
LOC_Os09g17740	185768	63737.9	1.54328	0.00393208
LOC_Os06g36340	59.367	13.3594	2.14171	0.00396234
LOC_Os03g37470	77.8591	251.732	-1.6913	0.00396294
LOC_Os12g41650	1331.43	3899.24	-1.55013	0.0039684
LOC_Os01g51670	64.2334	211.661	-1.71834	0.0039684
LOC_Os04g54550	30.169	110.969	-1.87454	0.00397998
LOC_Os05g14240	101.217	319.545	-1.6573	0.00397998
LOC_Os09g34010	354.267	113.024	1.64716	0.00397998
LOC_Os06g08032	14.5967	62.6778	-2.09261	0.00398829
LOC_Os02g36880	63.2601	14.3869	2.1272	0.00398829
LOC_Os07g43800	62.2868	205.496	-1.72003	0.00398829
LOC_Os06g38970	188.811	575.384	-1.60692	0.00401189
LOC_Os12g10184	198.544	59.5954	1.73414	0.00401914
LOC_Os04g44830	1270.11	427.429	1.57093	0.00401914
LOC_Os03g04570	197.571	597.989	-1.59711	0.0040281
LOC_Os05g34460	195.624	58.568	1.73782	0.0040281
LOC_Os03g11210	69.0997	15.4143	2.15563	0.0040281
LOC_Os05g02050	69.0997	15.4143	2.15563	0.0040281
LOC_Os12g29820	17.5165	71.925	-2.02979	0.00404206
LOC_Os08g34580	22.3829	87.3371	-1.95805	0.00404375
LOC_Os07g38590	86.6185	21.5791	1.99898	0.00404375
LOC_Os11g03600	18.4898	75.0074	-2.01277	0.00404474
LOC_Os12g41620	227.742	69.8701	1.70293	0.00404474
LOC_Os09g27750	19.4631	78.0898	-1.99726	0.00404474
LOC_Os03g62490	356.213	114.051	1.64202	0.00406813
LOC_Os05g17010	40.8749	7.19459	2.48633	0.00407527
LOC_Os07g42310	226.769	684.296	-1.59285	0.00409083
LOC_Os04g10690	19.4631	1.02984	4.0874	0.00409083
LOC_Os08g25290	19.4631	1.02984	4.0874	0.00409083
LOC_Os10g40820	19.4631	1.02984	4.0874	0.00409083
LOC_Os07g37230	932.387	2725.87	-1.54759	0.00412362
LOC_Os12g25200	241.368	75.0074	1.68453	0.00414493
LOC_Os11g39680	3.89077	30.8263	-2.94534	0.00415158
LOC_Os07g30240	124.576	34.9362	1.83065	0.0042125
LOC_Os06g38764	843.82	2467.98	-1.54818	0.0042125
LOC_Os11g28104	60.3403	198.304	-1.71437	0.0042125
LOC_Os04g57130	60.3403	198.304	-1.71437	0.0042125
LOC_Os12g43590	121.656	33.9087	1.83938	0.00423028
LOC_Os01g03310	5226.44	1799.1	1.53849	0.00423661
LOC_Os01g65350	1207.82	408.934	1.56219	0.00424864
LOC_Os05g46290	118.736	32.8813	1.8486	0.00424908
LOC_Os03g30300	153.774	45.2109	1.76335	0.00428649
LOC_Os03g12270	112.897	30.8263	1.86866	0.00429802
LOC_Os07g28480	1205.88	3504.69	-1.53911	0.00430935
LOC_Os05g13770	195.624	587.714	-1.58639	0.00432741
LOC_Os02g10490	29.1957	106.859	-1.86726	0.00434595
LOC_Os01g05650	22308.2	7729.64	1.52909	0.00439011
LOC_Os01g47256	174.212	51.3757	1.7593	0.00439011
LOC_Os10g27430	27.2492	100.694	-1.88073	0.0043948
LOC_Os05g50500	1546.52	528.121	1.54987	0.00440573
LOC_Os08g16580	134.309	410.989	-1.61261	0.00440862
LOC_Os03g08900	98.2977	25.689	1.931	0.00441542
LOC_Os12g09640	70.073	226.045	-1.68785	0.00442527
LOC_Os10g32110	9.7304	50.3482	-2.35614	0.00444396
LOC_Os03g53020	436.021	1280.23	-1.55365	0.00447281
LOC_Os01g52110	24616.8	8552.64	1.52519	0.00451716
LOC_Os02g54150	2449.71	7065.9	-1.52821	0.0045186
LOC_Os06g05050	378.598	1111.72	-1.55373	0.0045186
LOC_Os06g29844	802.943	2334.41	-1.53954	0.00451865
LOC_Os11g28470	4.86405	33.9087	-2.76938	0.0045404
LOC_Os08g09310	155.72	46.2383	1.74915	0.00454547
LOC_Os10g34840	20.4363	80.1448	-1.96473	0.00454721
LOC_Os05g02400	123.603	34.9362	1.81934	0.00454945
LOC_Os09g39620	35.0353	124.326	-1.82344	0.00454945
LOC_Os12g01490	63.2601	205.496	-1.6977	0.00458855
LOC_Os01g43370	1451.14	497.297	1.54478	0.00462542
LOC_Os02g37000	221.903	68.8426	1.68681	0.00466227
LOC_Os09g26880	1966	677.104	1.53764	0.00466381
LOC_Os11g02750	41.8482	143.848	-1.77816	0.00467172
LOC_Os03g14880	214.116	638.06	-1.57472	0.00469338
LOC_Os12g02330	26252.9	9155.77	1.51971	0.00469685
LOC_Os03g53200	152.801	463.39	-1.59976	0.00469791
LOC_Os01g61460	197.571	588.741	-1.57464	0.00471118
LOC_Os03g13950	680.311	229.128	1.56954	0.00476976
LOC_Os03g04970	298.791	95.5568	1.64347	0.00477282
LOC_Os01g09300	923.628	2663.2	-1.52764	0.00479732
LOC_Os09g26260	27.2492	3.08475	3.09348	0.0048047
LOC_Os02g07709	27.2492	3.08475	3.09348	0.0048047
LOC_Os09g20090	2.91749	26.7165	-3.13994	0.0048047
LOC_Os03g16700	2533.41	7263.17	-1.51947	0.00481344
LOC_Os11g11340	36.9819	6.16713	2.5607	0.00481501
LOC_Os01g47070	2135.34	6122.68	-1.51964	0.00483522
LOC_Os07g44160	128.469	36.9911	1.79282	0.00484785
LOC_Os02g51110	473.005	157.205	1.58847	0.00484922
LOC_Os10g40934	411.69	1201.11	-1.54444	0.00487661
LOC_Os05g48340	607.316	203.441	1.57727	0.00487661
LOC_Os05g30240	151.827	45.2109	1.74499	0.00487661
LOC_Os05g08480	1921.23	664.774	1.53092	0.00494289
LOC_Os08g09370	90.5116	23.6341	1.93179	0.00495042
LOC_Os03g42600	191.731	58.568	1.70884	0.00495042
LOC_Os02g43540	294.898	94.5293	1.64013	0.004956
LOC_Os03g56830	119.71	33.9087	1.81613	0.0049702
LOC_Os11g16480	188.811	57.5405	1.7122	0.00498041
LOC_Os05g47660	58.3938	189.056	-1.69273	0.00498041
LOC_Os05g02060	348.427	114.051	1.61015	0.00498644
LOC_Os11g14000	14.5967	1.38778e-17	6.88062	0.00498644
LOC_Os11g25990	14.5967	1.38778e-17	6.88062	0.00498644
LOC_Os05g05250	14.5967	1.38778e-17	6.88062	0.00498644
LOC_Os03g62860	1.38778e-17	15.4143	-6.95816	0.00498644
LOC_Os10g07248	1.38778e-17	15.4143	-6.95816	0.00498644
LOC_Os06g20810	1.38778e-17	15.4143	-6.95816	0.00498644
LOC_Os02g34790	1.38778e-17	15.4143	-6.95816	0.00498644
LOC_Os04g53180	39.9017	7.19459	2.45167	0.00498799
LOC_Os07g28850	456.46	1323.38	-1.5354	0.00499105
LOC_Os06g38890	112.897	346.259	-1.61573	0.00499105
LOC_Os09g38100	246.234	78.0898	1.65531	0.00500917
LOC_Os10g41790	113.87	31.8538	1.83392	0.00503476
LOC_Os03g55020	137.228	40.0735	1.77278	0.00506195
LOC_Os07g07220	256.94	82.1997	1.64279	0.00510202
LOC_Os06g46149	1529.97	4367.77	-1.51331	0.00512193
LOC_Os09g38910	7.78386	43.1559	-2.45171	0.00512678
LOC_Os04g49950	203.41	601.071	-1.56253	0.00512948
LOC_Os01g46570	899.296	308.243	1.54436	0.00514657
LOC_Os02g27310	308.523	899.037	-1.5426	0.00514657
LOC_Os02g38920	2583.05	902.119	1.51756	0.00515181
LOC_Os05g49230	541.134	181.864	1.57249	0.00515542
LOC_Os11g40890	18.4898	72.9525	-1.97276	0.00515791
LOC_Os07g37240	104167	36698.1	1.50512	0.00515791
LOC_Os12g01480	44.768	151.04	-1.75147	0.00517614
LOC_Os09g02770	104.137	319.545	-1.61632	0.00520188
LOC_Os11g17954	45.7413	9.24952	2.29105	0.00520188
LOC_Os05g48650	45.7413	9.24952	2.29105	0.00520188
LOC_Os02g36590	141.121	424.346	-1.58742	0.00521199
LOC_Os07g46630	102.191	27.7439	1.87645	0.00522346
LOC_Os11g44230	36.0086	125.353	-1.79591	0.00524332
LOC_Os11g38790	76.8858	242.485	-1.65545	0.00524336
LOC_Os07g30670	9.7304	49.3207	-2.32647	0.00524734
LOC_Os03g59240	48.6611	10.277	2.23	0.00524734
LOC_Os07g04410	48.6611	10.277	2.23	0.00524734
LOC_Os08g42430	10.7037	52.4032	-2.27788	0.00527696
LOC_Os09g37394	57.4205	13.3594	2.09372	0.00527696
LOC_Os11g47120	12.6502	58.568	-2.19953	0.00527696
LOC_Os01g41430	12.6502	58.568	-2.19953	0.00527696
LOC_Os03g01820	54.5007	12.3319	2.13296	0.00527696
LOC_Os01g42990	54.5007	12.3319	2.13296	0.00527696
LOC_Os03g08330	69.0997	218.853	-1.66137	0.00528238
LOC_Os09g20510	3.89077	29.7989	-2.89663	0.0053084
ChrSy.fgenesh.gene.44	3.89077	29.7989	-2.89663	0.0053084
LOC_Os03g63200	95.3779	25.689	1.88756	0.00531087
LOC_Os04g58850	110.95	338.039	-1.60615	0.00531663
LOC_Os11g14040	34.0621	119.189	-1.80311	0.0053253
LOC_Os12g28750	23.3561	2.05729	3.42931	0.0053709
LOC_Os04g02590	1.94421	22.6066	-3.45581	0.0053709
LOC_Os05g50080	23.3561	2.05729	3.42931	0.0053709
LOC_Os09g37730	1.94421	22.6066	-3.45581	0.0053709
LOC_Os12g25350	23.3561	2.05729	3.42931	0.0053709
LOC_Os01g16250	1.94421	22.6066	-3.45581	0.0053709
LOC_Os10g39020	1.94421	22.6066	-3.45581	0.0053709
LOC_Os03g57420	495.39	166.452	1.57277	0.0053709
LOC_Os04g33690	39.9017	136.656	-1.77272	0.00538526
LOC_Os01g18210	829.221	284.611	1.54237	0.00540844
LOC_Os02g09600	582.984	198.304	1.55517	0.00543591
LOC_Os05g45760	132.362	39.0461	1.7581	0.00544355
LOC_Os11g17480	208.277	611.346	-1.55289	0.00545613
LOC_Os06g41100	166.426	492.159	-1.5635	0.00551245
LOC_Os08g42910	363.026	1046.99	-1.52777	0.00554099
LOC_Os09g20500	50.6076	164.397	-1.69721	0.00556536
LOC_Os02g33060	30.169	106.859	-1.82015	0.00556536
LOC_Os08g36040	359.133	119.189	1.5903	0.00556804
LOC_Os01g09750	243.314	78.0898	1.6381	0.00563355
LOC_Os04g40740	490.524	165.425	1.56746	0.00563355
LOC_Os07g03020	29.1957	103.777	-1.82508	0.00563373
novel.214	41.8482	140.765	-1.74693	0.00566938
LOC_Os03g05806	515.829	174.672	1.56159	0.00566988
LOC_Os02g58170	77.8591	19.5242	1.98892	0.0056773
LOC_Os04g40670	1583.5	554.835	1.51279	0.00568555
LOC_Os08g26710	992.73	2811.15	-1.50157	0.00568716
LOC_Os02g01280	599.53	204.468	1.5514	0.00570349
LOC_Os02g01230	236.502	76.0349	1.63557	0.00570879
LOC_Os07g48602	435.048	1246.32	-1.51815	0.00571386
LOC_Os10g40710	18.4898	1.02984	4.01388	0.00571386
LOC_Os06g42660	18.4898	1.02984	4.01388	0.00571386
LOC_Os03g54930	18.4898	1.02984	4.01388	0.00571386
LOC_Os03g21110	18.4898	1.02984	4.01388	0.00571386
LOC_Os08g25839	0.970936	19.5242	-4.16106	0.00571386
LOC_Os04g55760	0.970936	19.5242	-4.16106	0.00571386
LOC_Os05g51240	1195.17	417.154	1.51829	0.00571386
LOC_Os07g07760	74.9393	18.4967	2.01136	0.00571386
LOC_Os08g01830	19.4631	75.0074	-1.93925	0.00571386
LOC_Os03g03080	233.582	75.0074	1.63725	0.00572709
LOC_Os06g51070	580.065	1652.17	-1.50987	0.00573631
LOC_Os11g01240	79.8056	248.649	-1.63797	0.00574532
LOC_Os06g04920	3754.86	1331.6	1.49551	0.00580947
LOC_Os01g16110	446.727	151.04	1.5637	0.00583813
LOC_Os03g50120	69.0997	16.4418	2.06324	0.00585656
LOC_Os08g21840	145.988	44.1834	1.72153	0.00590982
LOC_Os03g04390	36.0086	6.16713	2.52235	0.00591004
LOC_Os01g72680	5.83732	35.9637	-2.59697	0.00591004
LOC_Os09g29825	128.469	38.0186	1.75342	0.00591004
LOC_Os04g24510	92.4581	281.528	-1.60505	0.00591448
LOC_Os02g20870	140.148	42.1285	1.7312	0.00606373
LOC_Os06g35060	6.81059	39.0461	-2.49715	0.00608757
LOC_Os01g24490	23.3561	86.3096	-1.87993	0.00609737
LOC_Os03g31180	239.421	691.488	-1.52964	0.00609949
LOC_Os02g31860	588.824	1668.61	-1.50253	0.00609949
LOC_Os06g44040	12.6502	57.5405	-2.17405	0.00611962
LOC_Os03g04070	293.924	844.581	-1.52238	0.00614075
LOC_Os08g29660	212.17	615.455	-1.53586	0.0061595
LOC_Os03g22620	119.71	34.9362	1.77322	0.0061595
LOC_Os06g19640	53.5274	12.3319	2.10703	0.00616261
LOC_Os02g49760	485.658	1378.86	-1.50522	0.00616261
LOC_Os01g41900	606.343	1712.79	-1.49794	0.00618547
LOC_Os01g62350	249.154	81.1722	1.61654	0.00619687
LOC_Os02g52390	6482.93	2319	1.4831	0.0062008
LOC_Os02g50450	8.75713	45.2109	-2.35124	0.0062008
LOC_Os08g39870	47.6878	10.277	2.20093	0.0062008
LOC_Os03g16030	47.6878	10.277	2.20093	0.0062008
LOC_Os06g02800	47.6878	10.277	2.20093	0.0062008
LOC_Os05g36000	100.244	27.7439	1.84874	0.0062338
LOC_Os10g42690	150.854	443.868	-1.55616	0.0062389
LOC_Os04g39610	26.2759	3.08475	3.04125	0.0062389
LOC_Os01g40120	26.2759	3.08475	3.04125	0.0062389
LOC_Os01g25688	26.2759	3.08475	3.04125	0.0062389
LOC_Os02g42180	2.91749	25.689	-3.08362	0.0062389
LOC_Os08g39590	79.8056	20.5517	1.95095	0.00624134
LOC_Os04g38620	79.8056	20.5517	1.95095	0.00624134
LOC_Os04g25784	1165	409.962	1.50649	0.00624596
LOC_Os01g71340	2615.17	931.916	1.48851	0.00624596
LOC_Os01g27730	324.096	107.886	1.58583	0.00624596
LOC_Os02g11070	64.2334	201.386	-1.64659	0.00629537
LOC_Os06g05250	512.909	175.699	1.54495	0.00631221
LOC_Os03g52280	370.812	125.353	1.56377	0.00631708
LOC_Os06g46340	175.186	510.654	-1.54276	0.00633838
LOC_Os02g53420	2614.19	932.943	1.48638	0.00634348
LOC_Os01g15270	10328.3	3710.19	1.47701	0.00636483
LOC_Os06g02580	492.471	168.507	1.54655	0.00637705
LOC_Os10g39680	2703.73	965.822	1.48501	0.00638643
LOC_Os01g53450	32.1155	110.969	-1.7847	0.00638643
LOC_Os05g03640	449.647	1273.03	-1.50114	0.00641157
LOC_Os05g20460	272.512	89.392	1.6068	0.00642061
LOC_Os02g38490	124.576	36.9911	1.74847	0.00642061
LOC_Os09g21360	73.966	18.4967	1.99254	0.00642061
LOC_Os01g65700	19.4631	73.98	-1.91939	0.00642061
LOC_Os06g48180	206.33	65.7602	1.64787	0.00646366
LOC_Os04g02754	513.883	1447.7	-1.49402	0.00653674
LOC_Os03g08810	136.255	41.101	1.72611	0.00653674
LOC_Os07g12730	267.646	766.493	-1.51749	0.00655821
LOC_Os01g49210	188.811	59.5954	1.66168	0.00655821
LOC_Os04g38480	1563.06	4350.3	-1.47666	0.00655829
LOC_Os09g27820	224.822	72.9525	1.62215	0.00661618
LOC_Os03g05710	87.5918	23.6341	1.88455	0.00661886
LOC_Os01g40094	2346.54	839.443	1.4829	0.00666446
LOC_Os05g49320	157.667	49.3207	1.67419	0.00669557
LOC_Os01g13150	780.558	274.336	1.50815	0.00670381
LOC_Os07g18230	162.533	471.61	-1.53611	0.00673969
LOC_Os07g01820	23.3561	85.2821	-1.86268	0.00674083
LOC_Os01g62650	1516.35	540.45	1.48816	0.00680506
LOC_Os01g73110	29.1957	4.1122	2.79166	0.00680506
LOC_Os05g25890	3.89077	28.7714	-2.84622	0.00680506
LOC_Os04g51890	3.89077	28.7714	-2.84622	0.00680506
LOC_Os02g09960	292.951	832.251	-1.50595	0.00683199
LOC_Os05g18280	126.522	38.0186	1.73142	0.00683366
LOC_Os03g49560	22.3829	82.1997	-1.87071	0.00686227
LOC_Os01g51050	201.464	64.7328	1.63613	0.00686227
LOC_Os05g37930	1485.2	4116.04	-1.47052	0.00687326
LOC_Os02g36340	604.396	1689.16	-1.48254	0.00687326
LOC_Os06g02420	1052.1	372.973	1.49583	0.00687326
LOC_Os01g22480	249.154	82.1997	1.59842	0.00687452
LOC_Os03g15890	4159.74	1501.13	1.47037	0.00687754
LOC_Os06g01760	259.86	739.779	-1.50889	0.00690355
LOC_Os03g49620	894.43	2487.5	-1.47552	0.00691198
LOC_Os01g28450	3125.16	1127.13	1.47117	0.00696022
LOC_Os05g30700	59.367	14.3869	2.03575	0.00696022
LOC_Os09g37720	58.3938	14.3869	2.01196	0.00696022
LOC_Os08g43230	562.546	196.249	1.51871	0.00696587
LOC_Os02g46260	1401.5	3878.69	-1.46851	0.00698393
LOC_Os06g47530	239.421	681.213	-1.50805	0.00701557
LOC_Os03g03034	67.1532	207.551	-1.62606	0.00702533
LOC_Os07g08140	92.4581	25.689	1.84276	0.00705572
LOC_Os08g13650	249.154	707.928	-1.50608	0.0070684
LOC_Os08g08140	715.349	251.732	1.50631	0.00709506
LOC_Os05g30500	75.9126	19.5242	1.95246	0.00710484
LOC_Os12g32190	20.4363	76.0349	-1.8889	0.00710484
LOC_Os05g48930	305.603	102.749	1.57141	0.00710484
LOC_Os03g18540	269.593	89.392	1.59127	0.00715933
LOC_Os08g30780	11.6769	53.4306	-2.18168	0.00716985
LOC_Os06g09940	11.6769	53.4306	-2.18168	0.00716985
LOC_Os01g70130	653.06	1816.57	-1.47574	0.00718018
LOC_Os04g50204	493.444	1375.78	-1.47905	0.00722586
LOC_Os12g25490	1552.36	4279.41	-1.46287	0.00723016
LOC_Os03g41064	19.4631	72.9525	-1.89924	0.00724343
LOC_Os01g62420	1016.09	361.671	1.48997	0.00724343
LOC_Os01g60020	10.7037	50.3482	-2.2203	0.00724343
LOC_Os01g71840	21.4096	2.05729	3.30448	0.00724343
LOC_Os06g33980	22.3829	2.05729	3.36824	0.00724343
LOC_Os11g44690	21.4096	2.05729	3.30448	0.00724343
LOC_Os10g38040	21.4096	2.05729	3.30448	0.00724343
LOC_Os08g06370	21.4096	2.05729	3.30448	0.00724343
LOC_Os03g24070	21.4096	2.05729	3.30448	0.00724343
LOC_Os04g17050	598.557	209.606	1.51327	0.00724343
LOC_Os06g19260	75.9126	231.183	-1.60497	0.00725526
LOC_Os03g51910	83.6987	252.759	-1.593	0.00725526
LOC_Os05g48220	426.289	146.93	1.53593	0.0072583
novel.162	35.0353	6.16713	2.48296	0.00730077
LOC_Os10g06610	125.549	38.0186	1.72029	0.00731007
LOC_Os09g18230	9.7304	47.2658	-2.26522	0.00731519
LOC_Os10g04720	574.225	1595.66	-1.47426	0.00731519
LOC_Os12g19450	13.6235	1.38778e-17	6.78196	0.00731519
LOC_Os07g06860	1.38778e-17	14.3869	-6.85946	0.00731519
LOC_Os04g09450	1.38778e-17	14.3869	-6.85946	0.00731519
LOC_Os01g02910	13.6235	1.38778e-17	6.78196	0.00731519
LOC_Os01g65630	13.6235	1.38778e-17	6.78196	0.00731519
LOC_Os06g25470	1.38778e-17	14.3869	-6.85946	0.00731519
LOC_Os04g41370	1.38778e-17	14.3869	-6.85946	0.00731519
LOC_Os04g15840	13.6235	1.38778e-17	6.78196	0.00731519
LOC_Os05g50350	1.38778e-17	14.3869	-6.85946	0.00731519
LOC_Os01g38110	1.38778e-17	14.3869	-6.85946	0.00731519
LOC_Os12g24790	13.6235	1.38778e-17	6.78196	0.00731519
LOC_Os10g11100	13.6235	1.38778e-17	6.78196	0.00731519
LOC_Os02g34550	1.38778e-17	14.3869	-6.85946	0.00731519
LOC_Os05g41490	13.6235	1.38778e-17	6.78196	0.00731519
LOC_Os12g02870	171.293	491.132	-1.51894	0.00733838
LOC_Os01g47470	6.81059	38.0186	-2.4588	0.00733838
LOC_Os04g38370	7.78386	41.101	-2.38152	0.00735731
LOC_Os06g30380	789.317	279.474	1.49749	0.00737604
LOC_Os12g11660	143.068	414.072	-1.53233	0.00738955
novel.112	155.72	49.3207	1.65629	0.00746389
LOC_Os01g12560	188.811	60.6229	1.63707	0.0074648
LOC_Os04g44320	291.004	817.867	-1.49041	0.00748161
LOC_Os12g05080	256.94	725.394	-1.49686	0.00749094
LOC_Os04g32010	27.2492	95.5568	-1.80528	0.00754298
LOC_Os10g40490	424.342	1180.56	-1.47589	0.00757288
LOC_Os08g10649	175.186	55.4856	1.65656	0.00757288
LOC_Os05g51830	693.937	245.567	1.49823	0.00760048
LOC_Os05g07880	208.277	589.769	-1.50107	0.00764171
LOC_Os06g16240	218.983	620.593	-1.50228	0.00764171
LOC_Os11g42850	81.7522	246.595	-1.59129	0.00765588
LOC_Os12g36680	356.213	993.564	-1.47953	0.00768631
LOC_Os01g09220	26.2759	92.4744	-1.81026	0.0077046
LOC_Os08g03290	28678.3	10528.5	1.44565	0.00776019
LOC_Os05g41580	731.894	2014.87	-1.46081	0.00778527
LOC_Os08g04560	608.289	214.743	1.50162	0.00778527
LOC_Os12g37560	231.635	654.499	-1.49802	0.00782187
LOC_Os02g47030	45.7413	146.93	-1.68076	0.00783186
LOC_Os10g02670	25.3027	89.392	-1.8156	0.00788565
LOC_Os08g33670	421.422	146.93	1.51937	0.00795194
LOC_Os03g59774	154.747	49.3207	1.64725	0.00795327
LOC_Os03g26044	468.139	163.37	1.51811	0.00798011
[truncated: 1,350 more rows]
