# Supplementary material for: ThSCSP_12: Novel Effector in Tilletia horrida That Induces Cell Death and Defense Responses in Non-Host Plants
Source: Int J Mol Sci. 2022 Nov 25;23(23):14752. doi: 10.3390/ijms232314752 (PMC9736266; doi:10.3390/ijms232314752)
Supplement: Supplementary file 1 [file ijms-23-14752-s001.zip › Supplementary Table S2.xlsx]

## Sheet: Sheet1
Supplementary Table S2 The DEGs in ThSCSP_12OE4 compared with WT.
gene_id	ThSCSP_12OE4	WT	log2FoldChange	padj
LOC_Os04g27670	6992.1	1.77656	11.8378	9.41672e-52
LOC_Os03g56930	14523.9	16.958	9.73096	2.19807e-50
LOC_Os03g02470	2456.87	1.38778e-17	14.2719	2.2117e-42
novel.767	903.696	1.38778e-17	12.8291	6.67322e-32
LOC_Os05g12630	1388.57	11.5999	6.88697	6.47631e-28
LOC_Os03g18060	19.0467	1778.87	-6.53675	4.9745e-27
LOC_Os08g08130	549.836	0.883542	9.07854	4.9745e-27
LOC_Os06g47910	1539.75	16.958	6.49339	4.9745e-27
LOC_Os08g38170	5.60902	934.079	-7.35077	6.29335e-27
LOC_Os12g27254	935.051	6.24181	7.19659	6.29335e-27
LOC_Os12g14440	2286.66	32.1393	6.14686	1.02618e-26
LOC_Os04g15530	23.5259	1777.08	-6.23223	5.06882e-26
LOC_Os12g27220	615.905	2.66963	7.77974	5.73351e-26
LOC_Os04g27020	2.24971	654.567	-8.11357	9.79195e-26
LOC_Os02g52010	650.619	3.56269	7.45986	1.17543e-25
LOC_Os04g52260	18302.2	384.878	5.57098	1.93969e-25
LOC_Os01g52130	1151.17	16.065	6.15126	9.53656e-25
LOC_Os03g06970	959.687	12.493	6.24823	3.50841e-24
LOC_Os07g24830	433.376	1.77656	7.82612	1.10584e-23
LOC_Os01g58280	29.125	1608.3	-5.78161	1.32683e-23
LOC_Os02g52150	901.456	13.386	6.05934	3.61494e-23
LOC_Os09g19290	120.949	4838.32	-5.32071	5.11788e-23
LOC_Os09g10340	310.197	11636.8	-5.22885	5.11788e-23
LOC_Os05g06780	3002.22	79.4688	5.23713	4.15897e-22
LOC_Os09g19300	59.3599	2327.17	-5.29026	6.26132e-22
LOC_Os01g36294	4.48923	466.142	-6.66232	5.00377e-21
LOC_Os09g34230	424.418	4.45574	6.53147	8.22532e-21
LOC_Os10g01380	318.036	1.77656	7.37982	8.22532e-21
LOC_Os06g12455	421.058	4.45574	6.52001	9.14262e-21
LOC_Os11g20790	417.699	4.45574	6.50846	1.09681e-20
LOC_Os04g28420	1052.63	26.7812	5.28963	1.66147e-20
LOC_Os06g39875	556.555	9.8139	5.80637	2.0757e-20
LOC_Os06g39370	1281.07	38.3903	5.05559	1.02888e-19
LOC_Os08g04580	281.082	1.77656	7.20169	1.05338e-19
LOC_Os12g12500	231.811	1.38778e-17	10.8667	3.70705e-19
LOC_Os04g29790	31.3646	1055.53	-5.06762	3.87695e-19
LOC_Os07g26630	1656.21	58.0366	4.83157	4.32081e-19
LOC_Os06g38120	71.6778	2018.19	-4.81319	5.275e-19
LOC_Os09g08280	391.943	7.13483	5.75331	8.38776e-19
LOC_Os09g31080	1032.47	33.9253	4.9221	1.0279e-18
LOC_Os07g10050	14.5675	605.451	-5.36623	1.0279e-18
LOC_Os02g32814	2054.86	80.3618	4.67408	2.01762e-18
LOC_Os11g01310	208.295	1.38778e-17	10.7125	2.89938e-18
LOC_Os02g03670	632.702	18.7441	5.06706	4.87861e-18
LOC_Os04g30240	132.147	3091.59	-4.54694	5.28274e-18
LOC_Os07g08150	45091.4	2139.64	4.39732	6.85776e-18
LOC_Os01g28500	1.38778e-17	221.457	-10.801	1.0465e-17
LOC_Os11g46000	44.8023	1183.23	-4.7195	1.24e-17
LOC_Os08g40910	191.497	0.883542	7.55742	1.3989e-17
LOC_Os09g09510	51.5212	1297.53	-4.65141	1.40667e-17
LOC_Os12g33610	928.332	34.8183	4.73139	1.48298e-17
novel.611	188.138	0.883542	7.5319	1.83896e-17
LOC_Os05g35470	3207.14	151.803	4.39981	2.82078e-17
LOC_Os01g58100	434.496	11.5999	5.21104	3.0271e-17
LOC_Os04g14780	812.992	30.3532	4.7372	3.33622e-17
LOC_Os05g20020	181.419	1.38778e-17	10.5133	4.22171e-17
LOC_Os02g27130	12.3278	464.356	-5.22234	4.22171e-17
LOC_Os07g46920	375.146	9.8139	5.23744	7.54272e-17
LOC_Os02g03710	7100.72	371.483	4.2561	9.56505e-17
LOC_Os04g44150	389.704	10.7069	5.16832	1.02173e-16
LOC_Os03g21960	455.772	15.172	4.89657	1.76751e-16
LOC_Os06g14240	763.72	32.1393	4.56488	2.06944e-16
LOC_Os05g19910	145.585	2810.29	-4.26972	2.24351e-16
LOC_Os03g30950	164.622	0.883542	7.33939	2.54848e-16
LOC_Os01g57840	548.717	20.5301	4.73121	3.48986e-16
LOC_Os06g14406	53.7608	1152.87	-4.41963	4.20189e-16
LOC_Os03g02750	541.998	20.5301	4.71344	4.30845e-16
LOC_Os07g34850	23.5259	607.237	-4.68326	4.83944e-16
LOC_Os01g01660	3712.18	205.383	4.17499	4.98857e-16
LOC_Os04g30040	11.208	387.557	-5.09767	6.66545e-16
LOC_Os03g47754	33.6042	747.44	-4.4706	1.20041e-15
LOC_Os03g05290	26682.8	1622.59	4.03943	1.202e-15
LOC_Os12g33130	22.4061	562.587	-4.64311	1.22587e-15
LOC_Os08g35210	328.114	5573.26	-4.08578	1.26153e-15
LOC_Os04g09900	60.4797	1186.8	-4.29192	1.3114e-15
novel.15	212.774	3.56269	5.84789	1.75748e-15
LOC_Os04g52250	1.12998	190.202	-7.2574	1.78612e-15
LOC_Os05g11320	540.878	8892.58	-4.03894	1.78612e-15
LOC_Os12g31860	146.705	1.38778e-17	10.2071	2.51295e-15
LOC_Os02g16060	17.9269	476.858	-4.7246	2.56622e-15
LOC_Os09g26260	188.138	2.66963	6.06943	2.63606e-15
novel.679	145.585	1.38778e-17	10.1961	2.78128e-15
LOC_Os01g63620	1967.51	114.296	4.10393	3.1215e-15
LOC_Os03g60880	144.465	1.38778e-17	10.1849	3.1215e-15
LOC_Os05g27780	116.47	1958.36	-4.0703	5.48549e-15
LOC_Os10g36580	1148.93	65.1806	4.13691	5.88382e-15
LOC_Os04g51280	889.139	47.3204	4.228	5.96002e-15
LOC_Os04g55710	2967.5	44888	-3.91896	6.1457e-15
LOC_Os12g21730	33.6042	683.143	-4.34086	6.89016e-15
LOC_Os01g10110	23.5259	528.652	-4.48337	7.17656e-15
LOC_Os03g59190	231.811	5.34877	5.40274	7.26704e-15
LOC_Os09g26620	129.908	2134.28	-4.03701	7.38551e-15
LOC_Os03g04190	157.903	1.77656	6.3702	7.50446e-15
LOC_Os07g08160	51974.8	3484.51	3.89873	7.70268e-15
LOC_Os01g59510	433.376	18.7441	4.52127	8.98663e-15
LOC_Os02g57930	4.48923	225.922	-5.61782	9.03858e-15
LOC_Os01g63180	64.9589	1130.54	-4.11898	1.24975e-14
LOC_Os07g32710	132.147	1.38778e-17	10.0565	1.3098e-14
LOC_Os11g03580	836.508	46.4274	4.16739	1.36393e-14
LOC_Os05g03320	6.72881	251.82	-5.20237	1.52137e-14
LOC_Os04g35880	151.184	2355.75	-3.9608	1.56644e-14
LOC_Os10g10130	611.426	8871.14	-3.85862	1.97331e-14
LOC_Os11g32880	354.99	15.172	4.53613	2.17435e-14
LOC_Os04g29810	132.147	1985.15	-3.90788	4.30371e-14
LOC_Os06g47970	10899.1	790.304	3.78543	4.99411e-14
LOC_Os09g35790	2510.62	174.128	3.84879	5.26471e-14
LOC_Os02g53840	56.0004	926.042	-4.04483	5.83803e-14
LOC_Os03g03724	789.476	48.2135	4.02961	6.2887e-14
LOC_Os01g04590	406.501	19.6371	4.36225	6.40415e-14
LOC_Os12g05210	174.7	3.56269	5.56362	6.93922e-14
LOC_Os01g43740	404.261	19.6371	4.35428	6.9774e-14
LOC_Os06g08610	31.3646	578.661	-4.2006	7.04055e-14
LOC_Os02g40130	39.2033	684.036	-4.12111	7.69705e-14
LOC_Os01g45914	188.138	4.45574	5.35826	8.09816e-14
LOC_Os04g29800	20.1665	425.063	-4.38995	8.40348e-14
LOC_Os04g22120	26.8854	516.15	-4.25715	9.67164e-14
LOC_Os07g45074	43.6825	741.189	-4.0812	9.91083e-14
LOC_Os07g04990	10994.3	828.704	3.72954	1.03005e-13
LOC_Os08g43334	184.779	4.45574	5.33229	1.19699e-13
LOC_Os04g34600	1268.75	86.6129	3.8706	1.25283e-13
LOC_Os10g09240	431.137	22.3161	4.26378	1.2678e-13
LOC_Os02g48770	134.387	1.77656	6.13774	1.49953e-13
LOC_Os08g10310	6.72881	223.243	-5.02869	1.50381e-13
LOC_Os08g07080	25698.5	2001.22	3.68264	1.56153e-13
LOC_Os09g13440	883.54	11394.8	-3.68877	1.79727e-13
novel.455	357.229	17.8511	4.31249	1.85344e-13
LOC_Os06g43150	147.825	2.66963	5.72177	2.08106e-13
LOC_Os08g39850	199.336	2671.87	-3.74382	2.08561e-13
LOC_Os08g33150	206.055	2759.39	-3.74252	2.08561e-13
LOC_Os03g16020	248.608	9.8139	4.64408	2.12643e-13
LOC_Os09g19510	13.4476	311.651	-4.52292	2.21829e-13
LOC_Os08g07900	111.991	1.38778e-17	9.81793	2.32779e-13
LOC_Os06g08620	8.96841	258.071	-4.82925	2.34129e-13
LOC_Os04g29770	237.41	3112.13	-3.71182	2.62324e-13
LOC_Os07g29960	7.84861	242.89	-4.93166	2.62517e-13
LOC_Os12g02530	226.211	2962.1	-3.71021	2.83613e-13
LOC_Os08g24400	21.2863	409.882	-4.25996	2.87295e-13
LOC_Os06g04510	1815.22	135.728	3.74003	3.03583e-13
LOC_Os03g12990	3260.89	254.499	3.67883	3.54121e-13
LOC_Os03g13030	606.947	38.3903	3.97803	3.54121e-13
LOC_Os11g44800	863.383	59.8226	3.84822	3.8317e-13
LOC_Os02g49880	21.2863	402.738	-4.2346	3.95778e-13
LOC_Os11g02240	171.341	4.45574	5.22343	4.30418e-13
LOC_Os09g23595	264.285	11.5999	4.49403	4.40583e-13
LOC_Os03g63330	1584.54	119.654	3.72562	4.47775e-13
LOC_Os04g35030	40.3231	633.135	-3.96906	4.58875e-13
LOC_Os09g24620	2890.24	229.494	3.65388	5.36743e-13
LOC_Os12g35670	195.977	6.24181	4.94289	5.41276e-13
LOC_Os08g36680	2.24971	151.803	-6.0062	5.77934e-13
LOC_Os02g18690	106.392	1.38778e-17	9.74401	5.77934e-13
LOC_Os02g51900	17.9269	357.195	-4.30789	5.9957e-13
LOC_Os08g35160	853.305	60.7156	3.80995	6.11586e-13
LOC_Os02g09910	1.38778e-17	120.547	-9.92427	6.2418e-13
LOC_Os03g17140	296.759	14.279	4.36447	6.34723e-13
LOC_Os12g32330	707.729	49.1065	3.84554	6.4037e-13
LOC_Os04g59440	12446.7	1043.92	3.57551	6.43112e-13
LOC_Os06g05420	137.747	2.66963	5.61998	6.55003e-13
novel.91	105.272	1.38778e-17	9.72876	6.55003e-13
LOC_Os02g41630	1634.93	19398.8	-3.56858	6.84597e-13
LOC_Os11g41034	237.41	2939.78	-3.62963	7.35448e-13
LOC_Os03g46280	1.38778e-17	101.794	-9.68061	7.68344e-13
LOC_Os06g11290	827.549	59.8226	3.78707	8.16568e-13
LOC_Os12g06870	695.412	49.1065	3.82021	8.70915e-13
LOC_Os11g47210	1.38778e-17	100.901	-9.66792	9.02771e-13
LOC_Os07g09190	119.83	1544	-3.68637	9.05937e-13
LOC_Os10g41870	398.662	24.1021	4.04039	9.10273e-13
LOC_Os01g02780	537.518	6360	-3.56436	1.01933e-12
LOC_Os01g61940	101.913	1.38778e-17	9.68202	1.05613e-12
LOC_Os01g62260	100.793	1.38778e-17	9.6661	1.25986e-12
LOC_Os01g02560	97.4334	1253.78	-3.68418	1.26145e-12
LOC_Os08g08205	47.042	677.785	-3.84559	1.30784e-12
LOC_Os04g11970	17.9269	341.121	-4.24148	1.33452e-12
LOC_Os06g15390	173.58	5.34877	4.98564	1.33452e-12
LOC_Os06g18670	370.667	4369.49	-3.55887	1.36505e-12
LOC_Os11g46870	78.3966	1028.74	-3.71203	1.41081e-12
LOC_Os01g21990	630.463	44.6414	3.81592	1.44545e-12
LOC_Os02g09940	3115.32	265.215	3.55348	1.60803e-12
LOC_Os12g12130	50.4014	703.682	-3.8004	1.61232e-12
LOC_Os04g29780	1.38778e-17	114.296	-9.84753	1.6212e-12
LOC_Os09g26660	574.472	6598.44	-3.52156	1.71598e-12
LOC_Os12g03350	656.218	48.2135	3.76294	1.82712e-12
LOC_Os02g06725	56.0004	765.3	-3.76983	1.913e-12
LOC_Os11g45190	1.38778e-17	96.436	-9.60271	2.02692e-12
LOC_Os09g19500	10.0882	239.317	-4.55274	2.17486e-12
LOC_Os12g02200	276.603	15.172	4.1763	2.18543e-12
LOC_Os07g01560	220.612	2581.68	-3.54805	2.41097e-12
LOC_Os03g15460	844.346	66.0737	3.67298	2.55413e-12
LOC_Os01g59090	2222.83	191.988	3.53238	2.85758e-12
LOC_Os03g30740	139.986	3.56269	5.24426	2.8929e-12
LOC_Os08g02354	14.5675	279.503	-4.25146	3.16397e-12
LOC_Os03g20970	2.24971	135.728	-5.84487	3.77014e-12
LOC_Os05g04930	1.38778e-17	91.9709	-9.53441	4.13057e-12
LOC_Os02g53850	17.9269	318.795	-4.14387	4.58692e-12
LOC_Os07g45070	163.502	1864.59	-3.51058	5.29148e-12
LOC_Os08g06050	436.736	30.3532	3.84089	5.832e-12
LOC_Os07g49400	41943.6	3979.24	3.39784	6.32176e-12
LOC_Os08g39840	47.042	622.418	-3.72267	6.46631e-12
LOC_Os03g61910	29.125	431.314	-3.88321	6.60783e-12
LOC_Os05g04600	150.064	1703.85	-3.50416	6.79128e-12
LOC_Os03g20480	169.101	6.24181	4.73023	7.38554e-12
LOC_Os09g07300	239.649	2636.15	-3.45882	7.38554e-12
LOC_Os01g48960	263.165	2866.55	-3.44472	7.84646e-12
LOC_Os01g44430	437.855	31.2462	3.80294	8.36579e-12
LOC_Os07g38630	978.723	83.9339	3.54146	8.86122e-12
LOC_Os07g11150	276.603	16.958	4.01707	9.93621e-12
LOC_Os04g01874	1.38778e-17	87.5059	-9.46272	1.02458e-11
LOC_Os04g44060	89.5947	1.38778e-17	9.4964	1.02458e-11
LOC_Os09g38100	786.116	67.8597	3.5315	1.68846e-11
LOC_Os01g19020	86.2353	1.38778e-17	9.44133	1.86651e-11
LOC_Os01g26270	5.60902	158.054	-4.78865	2.01974e-11
LOC_Os01g03950	85.1155	1.38778e-17	9.4225	2.25226e-11
novel.390	85.1155	0.883542	6.38866	2.25226e-11
LOC_Os02g33020	465.851	36.6043	3.66489	2.25226e-11
LOC_Os01g18744	82.8759	940.33	-3.50236	2.25582e-11
LOC_Os09g19400	33.6042	442.924	-3.71588	2.33555e-11
LOC_Os01g37460	3432.23	338.442	3.34165	2.45383e-11
LOC_Os10g36848	35.8439	470.607	-3.71054	2.5085e-11
LOC_Os06g38340	344.911	3500.59	-3.34288	2.54045e-11
LOC_Os01g49750	110.871	2.66963	5.30713	2.86405e-11
LOC_Os11g28530	28.0052	387.557	-3.78526	2.94752e-11
LOC_Os01g70490	77.2768	863.531	-3.48023	3.21535e-11
LOC_Os09g28690	1021.28	94.65	3.42976	3.21617e-11
LOC_Os02g01220	354.99	26.7812	3.72179	3.89917e-11
LOC_Os10g36200	904.816	83.9339	3.42819	3.92151e-11
LOC_Os01g14410	37846.2	3962.27	3.2557	4.21844e-11
LOC_Os08g10320	283.322	2799.57	-3.30418	4.80013e-11
LOC_Os04g10160	5.60902	150.017	-4.71342	4.94662e-11
novel.502	7.84861	180.379	-4.50266	5.53958e-11
LOC_Os01g73940	6659.52	698.324	3.2532	5.78175e-11
LOC_Os09g19310	82.8759	893.893	-3.42931	5.78175e-11
novel.794	161.263	7.13483	4.47268	5.79488e-11
LOC_Os08g37700	433.376	35.7113	3.59617	5.81442e-11
LOC_Os12g11510	1.38778e-17	77.6828	-9.29121	5.93461e-11
LOC_Os04g42620	127.668	4.45574	4.79929	6.7939e-11
LOC_Os06g44230	680.854	62.5016	3.44255	7.10143e-11
LOC_Os03g48235	79.5164	0.883542	6.29063	7.28129e-11
LOC_Os06g39240	276.603	19.6371	3.807	7.46465e-11
LOC_Os07g28000	16.8071	263.429	-3.96123	7.6745e-11
LOC_Os01g06870	22.4061	310.758	-3.78711	7.90956e-11
LOC_Os01g71840	91.8343	1.77656	5.58901	8.35299e-11
LOC_Os06g05040	1.38778e-17	75.8968	-9.25771	8.87784e-11
LOC_Os07g08200	1147.81	115.189	3.31529	9.25548e-11
LOC_Os02g56060	51.5212	575.982	-3.47992	9.55078e-11
LOC_Os07g48450	1.12998	100.901	-6.3437	9.9874e-11
LOC_Os06g30901	43.6825	508.113	-3.53663	1.08656e-10
LOC_Os01g62980	203.815	12.493	4.01356	1.08656e-10
LOC_Os06g15910	32.4844	397.38	-3.60812	1.13101e-10
LOC_Os05g03972	89.5947	1.77656	5.55344	1.19096e-10
LOC_Os01g47190	154.544	7.13483	4.41132	1.2405e-10
novel.740	76.157	0.883542	6.22845	1.33458e-10
LOC_Os01g02570	306.838	2855.83	-3.21789	1.40471e-10
LOC_Os04g24220	391.943	3606.86	-3.20166	1.47186e-10
LOC_Os11g02610	260.926	2434.33	-3.22126	1.52065e-10
LOC_Os06g38580	32.4844	390.236	-3.58195	1.55432e-10
LOC_Os12g36860	88.4749	891.214	-3.33079	1.55432e-10
LOC_Os03g18030	7.84861	168.77	-4.40676	1.60228e-10
LOC_Os03g52810	2.24971	108.938	-5.52801	1.60228e-10
LOC_Os05g47840	75.0372	0.883542	6.20711	1.6135e-10
LOC_Os04g27540	1.38778e-17	73.2177	-9.20596	1.6135e-10
LOC_Os06g13320	730.126	71.4317	3.35105	1.62858e-10
LOC_Os08g41960	160.143	8.92088	4.14564	1.85113e-10
LOC_Os01g42410	21.2863	286.647	-3.74422	1.87389e-10
LOC_Os01g06750	54.8806	587.591	-3.41777	1.9885e-10
LOC_Os03g08900	287.801	22.3161	3.68089	1.9885e-10
LOC_Os03g50325	83.9957	842.099	-3.32387	2.04211e-10
LOC_Os03g46270	1.12998	96.436	-6.27849	2.22418e-10
LOC_Os02g43130	40.3231	450.961	-3.47967	2.3727e-10
LOC_Os10g28350	166.862	9.8139	4.06919	2.39417e-10
LOC_Os06g21820	14.5675	219.671	-3.90413	2.4201e-10
LOC_Os11g38260	13828.5	1594.01	3.1168	2.59315e-10
LOC_Os12g24320	231.811	2111.06	-3.18633	2.59558e-10
LOC_Os11g31740	85.1155	1.77656	5.47954	2.93943e-10
LOC_Os03g11734	77.2768	761.728	-3.29929	3.1818e-10
LOC_Os10g06630	574.472	57.1436	3.3265	3.28299e-10
LOC_Os01g74450	48848.3	5743.83	3.0882	3.57597e-10
LOC_Os09g25810	7139.91	833.169	3.09902	3.84015e-10
LOC_Os01g43090	424.418	39.2833	3.429	3.84124e-10
LOC_Os03g13870	1730.12	193.774	3.15753	3.86301e-10
LOC_Os04g38680	153.424	8.92088	4.08385	3.97339e-10
LOC_Os02g58554	163.502	1477.92	-3.17531	4.07436e-10
LOC_Os01g60730	94.074	2.66963	5.07038	4.38114e-10
LOC_Os01g23990	3053.73	352.73	3.11345	4.39969e-10
LOC_Os11g31530	15.6873	221.457	-3.80976	4.50698e-10
LOC_Os02g04760	3.36946	111.617	-5.00354	4.59482e-10
LOC_Os11g41100	20.1665	264.322	-3.70484	4.59482e-10
LOC_Os04g30250	315.796	2741.53	-3.11746	4.83477e-10
LOC_Os04g46894	162.382	1454.7	-3.16238	4.83766e-10
LOC_Os04g37619	15566.5	1858.34	3.06626	4.84156e-10
LOC_Os10g02400	4.48923	121.44	-4.72297	4.99475e-10
LOC_Os07g44740	1435.61	161.626	3.14986	5.14759e-10
LOC_Os12g02540	20.1665	261.643	-3.69015	5.19534e-10
LOC_Os03g12110	33.6042	370.59	-3.45873	5.52931e-10
novel.748	69.4382	1.38778e-17	9.12925	5.73825e-10
LOC_Os04g02580	1.38778e-17	66.9667	-9.07746	5.73825e-10
LOC_Os02g31860	164.622	1450.24	-3.13819	6.30488e-10
LOC_Os09g19229	34.724	383.985	-3.4628	6.58705e-10
LOC_Os06g46140	96.3136	885.856	-3.19977	6.79168e-10
novel.2	195.977	1704.75	-3.12008	6.88045e-10
LOC_Os03g03980	217.253	16.958	3.66879	7.1286e-10
LOC_Os01g26174	32.4844	357.195	-3.45436	7.23073e-10
LOC_Os07g43950	1905.93	223.243	3.09303	7.23073e-10
LOC_Os03g53010	29.125	332.19	-3.50661	7.24068e-10
LOC_Os07g38230	693.172	75.0038	3.20586	7.86166e-10
LOC_Os10g05130	2466.95	293.791	3.06928	8.30876e-10
LOC_Os10g04290	15.6873	212.527	-3.75041	8.31212e-10
LOC_Os01g49710	206.055	15.172	3.75172	8.70941e-10
LOC_Os02g02400	1578.94	12804	-3.01947	8.89949e-10
LOC_Os03g57880	197.096	14.279	3.77436	9.10786e-10
LOC_Os05g47540	847.706	94.65	3.16105	9.47782e-10
LOC_Os10g41980	20189.1	2512.92	3.00607	1.00969e-09
LOC_Os05g32170	3.36946	106.259	-4.93266	1.09921e-09
LOC_Os03g50960	135.507	7.13483	4.22182	1.11184e-09
LOC_Os02g44090	117.59	5.34877	4.42425	1.12884e-09
LOC_Os01g16714	29.125	321.474	-3.45932	1.24223e-09
LOC_Os01g06310	218.373	17.8511	3.60273	1.27368e-09
LOC_Os09g16920	274.363	24.9952	3.44929	1.36629e-09
LOC_Os05g02250	13474.7	1705.64	2.98177	1.4087e-09
LOC_Os01g56420	875.701	100.901	3.11578	1.43928e-09
LOC_Os05g49890	18311.1	2327.17	2.976	1.48419e-09
LOC_Os10g40934	120.949	1043.92	-3.10836	1.49135e-09
LOC_Os05g28520	115.35	5.34877	4.39654	1.49402e-09
LOC_Os02g42585	157.903	10.7069	3.8656	1.51093e-09
LOC_Os08g34500	157.903	10.7069	3.8656	1.51093e-09
novel.101	729.006	83.0408	3.13195	1.57495e-09
LOC_Os12g21720	19.0467	236.638	-3.62725	1.62683e-09
LOC_Os02g50845	60.4797	560.801	-3.21059	1.62725e-09
LOC_Os11g45510	5.60902	121.44	-4.40885	1.66211e-09
LOC_Os03g49430	190.378	14.279	3.72435	1.67024e-09
LOC_Os04g54620	173.58	12.493	3.78205	1.76656e-09
LOC_Os03g55090	173.58	12.493	3.78205	1.76656e-09
LOC_Os04g44050	104.152	4.45574	4.50587	1.99985e-09
LOC_Os03g21560	10317.9	1331.47	2.95394	2.00421e-09
LOC_Os05g42120	577.832	64.2876	3.16533	2.10913e-09
LOC_Os09g19390	75.0372	661.711	-3.13862	2.5477e-09
LOC_Os01g11860	51.5212	476.858	-3.20753	2.67258e-09
LOC_Os01g07280	229.571	1821.73	-2.98769	2.93963e-09
LOC_Os01g61700	992.161	120.547	3.03955	2.93963e-09
LOC_Os11g36000	69.4382	609.916	-3.13275	3.04419e-09
LOC_Os06g04920	8752.44	1157.33	2.91874	3.20307e-09
LOC_Os04g57930	4644.98	608.13	2.93294	3.26469e-09
LOC_Os02g11110	427.777	46.4274	3.20006	3.27928e-09
LOC_Os04g05010	751.402	89.2919	3.07105	3.39608e-09
LOC_Os11g12310	40.3231	386.664	-3.25782	3.43641e-09
LOC_Os07g46852	169.101	1350.22	-2.99641	3.72366e-09
LOC_Os11g07830	71.6778	1.77656	5.23201	3.77646e-09
LOC_Os12g13860	2.24971	89.2919	-5.24149	3.86197e-09
LOC_Os03g60260	141.106	9.8139	3.8275	4.05653e-09
LOC_Os05g49880	14310.1	1923.53	2.89511	4.10115e-09
LOC_Os12g02340	16649.3	2248.59	2.8883	4.43717e-09
LOC_Os06g14670	124.309	8.02786	3.93031	4.48955e-09
LOC_Os01g61044	1950.72	253.606	2.94267	4.48955e-09
LOC_Os12g38300	70.558	1.77656	5.20933	4.64972e-09
LOC_Os09g29560	207.175	1608.3	-2.95594	4.90469e-09
LOC_Os06g05430	298.999	30.3532	3.29445	4.96901e-09
LOC_Os01g04540	5.60902	113.403	-4.31018	4.9972e-09
LOC_Os11g42850	17.9269	214.313	-3.57125	5.10213e-09
LOC_Os02g37700	213.894	1652.95	-2.94943	5.22176e-09
LOC_Os05g32820	1940.64	254.499	2.93013	5.2219e-09
LOC_Os07g48020	432.256	3233.58	-2.90285	5.61921e-09
LOC_Os06g15730	511.763	3814.93	-2.89784	5.64846e-09
LOC_Os01g16340	288.921	29.4602	3.28789	5.72716e-09
LOC_Os01g02510	1.38778e-17	57.1436	-8.8491	5.73504e-09
LOC_Os08g27800	1.38778e-17	57.1436	-8.8491	5.73504e-09
LOC_Os06g09820	122.069	7.13483	4.07129	5.73504e-09
LOC_Os04g09260	6.72881	119.654	-4.12969	5.73504e-09
LOC_Os06g04200	581.191	69.6457	3.05843	5.94414e-09
LOC_Os01g04070	33.6042	323.26	-3.26168	5.94983e-09
LOC_Os06g12490	12.3278	166.091	-3.73983	6.24307e-09
ChrSy.fgenesh.gene.32	88.4749	3.56269	4.583	6.37601e-09
novel.404	5.60902	110.724	-4.27573	6.50106e-09
novel.735	527.44	62.5016	3.07428	6.51764e-09
LOC_Os03g53540	15.6873	188.416	-3.5768	6.61666e-09
LOC_Os11g47980	83.9957	689.394	-3.03526	6.95918e-09
LOC_Os02g53510	842.107	106.259	2.9848	6.98986e-09
LOC_Os01g02790	332.593	2468.27	-2.89125	7.18544e-09
LOC_Os04g07890	58.2401	0.883542	5.84214	7.24235e-09
LOC_Os11g29740	248.608	24.9952	3.30714	7.28359e-09
LOC_Os03g37140	119.83	7.13483	4.0446	7.38654e-09
LOC_Os08g27150	988.802	127.691	2.95168	7.46505e-09
LOC_Os05g03960	297.879	31.2462	3.24739	7.75959e-09
LOC_Os04g32850	247.488	24.9952	3.30063	7.75959e-09
LOC_Os05g02060	779.397	99.115	2.97346	7.79541e-09
LOC_Os12g32770	73.9174	610.809	-3.04482	8.10846e-09
LOC_Os01g08270	193.737	1465.42	-2.91842	8.16529e-09
LOC_Os02g56070	7.84861	125.012	-3.97417	8.16529e-09
LOC_Os03g25050	223.972	21.4231	3.37786	8.31521e-09
LOC_Os09g23350	43.6825	388.45	-3.14933	8.35995e-09
LOC_Os11g09180	28.0052	280.396	-3.31851	8.35995e-09
LOC_Os04g41680	4.48923	100.901	-4.45599	8.35995e-09
LOC_Os10g18370	828.669	5973.33	-2.8495	8.36189e-09
LOC_Os12g43440	13.4476	169.663	-3.64617	8.52233e-09
LOC_Os12g36850	229.571	1708.32	-2.89496	8.66513e-09
LOC_Os06g47130	481.528	58.0366	3.04962	8.94296e-09
ChrUn.fgenesh.gene.85	1.38778e-17	55.3575	-8.80339	9.04465e-09
LOC_Os01g04260	302.359	33.0323	3.18905	9.09488e-09
LOC_Os07g43740	77.2768	2.66963	4.787	9.09488e-09
LOC_Os06g18960	5.60902	108.045	-4.24043	9.63229e-09
LOC_Os01g52010	301.239	2202.15	-2.86948	9.8232e-09
LOC_Os02g50799	106.392	828.704	-2.96015	9.85663e-09
LOC_Os10g04730	1115.34	7876.33	-2.81992	1.04121e-08
LOC_Os04g03830	34.724	325.939	-3.22645	1.04121e-08
LOC_Os02g46030	250.847	1843.16	-2.87675	1.04666e-08
LOC_Os06g10510	1818.58	250.034	2.86194	1.11082e-08
LOC_Os01g74410	128.788	983.194	-2.93139	1.13396e-08
LOC_Os02g43790	14.5675	174.128	-3.56916	1.16031e-08
LOC_Os06g50230	492.726	3517.55	-2.83544	1.16031e-08
LOC_Os10g41999	1587.9	217.885	2.8647	1.18656e-08
LOC_Os11g47870	33.6042	308.972	-3.19649	1.20504e-08
LOC_Os01g72520	232.93	23.2091	3.31958	1.20823e-08
LOC_Os10g38940	1257.56	170.556	2.88131	1.24703e-08
LOC_Os09g24630	174.7	16.065	3.4319	1.26659e-08
LOC_Os02g08490	789.476	103.58	2.9285	1.32136e-08
LOC_Os11g12300	24.6457	242.89	-3.29501	1.41046e-08
LOC_Os05g45920	258.686	27.6742	3.21829	1.41337e-08
LOC_Os10g34230	181.419	16.958	3.40889	1.41337e-08
LOC_Os12g12570	67.1985	542.048	-3.00982	1.41337e-08
LOC_Os08g43230	1247.48	170.556	2.8697	1.42461e-08
LOC_Os10g35370	8244.05	1192.16	2.78964	1.4426e-08
LOC_Os01g41750	118.71	899.251	-2.92011	1.46255e-08
LOC_Os04g50780	54.8806	1.38778e-17	8.79044	1.46255e-08
LOC_Os02g37160	1.38778e-17	53.5715	-8.7562	1.46255e-08
LOC_Os12g25090	98.5532	5.34877	4.16973	1.50782e-08
LOC_Os04g40670	3372.88	482.216	2.80588	1.52376e-08
LOC_Os03g29540	68.3183	544.727	-2.99313	1.58282e-08
LOC_Os07g03900	165.742	1216.27	-2.87462	1.5885e-08
LOC_Os05g48810	864.503	116.975	2.88422	1.76418e-08
LOC_Os11g44810	611.426	4226.6	-2.78903	1.81495e-08
LOC_Os02g13430	197.096	1417.2	-2.84537	1.82371e-08
LOC_Os05g30500	178.06	16.958	3.38195	1.84175e-08
LOC_Os10g14920	19.0467	204.49	-3.41673	1.84923e-08
LOC_Os12g07640	17.9269	197.346	-3.45234	1.84923e-08
LOC_Os07g48080	53.7608	0.883542	5.72692	1.88214e-08
LOC_Os07g35020	512.883	66.0737	2.9539	1.95697e-08
LOC_Os09g32730	1.12998	71.4317	-5.84618	1.96976e-08
LOC_Os01g46760	97.4334	5.34877	4.15326	2.05984e-08
LOC_Os11g28360	36.9637	325.939	-3.13656	2.07828e-08
LOC_Os03g18850	8.96841	132.156	-3.86444	2.07828e-08
LOC_Os02g16940	2.24971	79.4688	-5.07361	2.11617e-08
LOC_Os02g17590	20.1665	208.955	-3.36593	2.14413e-08
LOC_Os05g47700	175.82	16.958	3.3637	2.19232e-08
LOC_Os09g31120	751.402	101.794	2.88226	2.22389e-08
LOC_Os06g38900	21.2863	215.206	-3.33089	2.29402e-08
LOC_Os08g33390	829.789	115.189	2.84727	2.66121e-08
LOC_Os02g27300	13.4476	158.054	-3.544	2.69255e-08
LOC_Os09g24260	118.71	867.103	-2.8676	2.69945e-08
LOC_Os09g39620	6.72881	108.045	-3.98263	2.77968e-08
LOC_Os07g03870	142.226	1017.13	-2.83728	2.8212e-08
LOC_Os01g07270	4.48923	92.8639	-4.3364	2.82952e-08
LOC_Os04g44300	181.419	1274.32	-2.81157	2.85358e-08
LOC_Os01g02550	50.4014	406.31	-3.00825	2.91399e-08
LOC_Os04g33610	3193.71	473.286	2.75409	2.92155e-08
LOC_Os01g40120	70.558	2.66963	4.65598	2.947e-08
LOC_Os04g32740	51.5212	411.668	-2.99552	2.97826e-08
LOC_Os08g32060	101.913	6.24181	4.00032	3.02547e-08
LOC_Os01g19740	14560.9	2206.62	2.72211	3.04543e-08
LOC_Os07g33580	2.24971	76.7898	-5.02422	3.04956e-08
novel.196	68.3183	523.294	-2.93524	3.11847e-08
LOC_Os02g13870	1.38778e-17	49.9995	-8.6569	3.11847e-08
LOC_Os04g29090	1.38778e-17	49.9995	-8.6569	3.11847e-08
LOC_Os04g11390	8814.03	1336.83	2.72087	3.17728e-08
LOC_Os12g21734	23.5259	224.136	-3.24592	3.17728e-08
LOC_Os05g38680	3228.42	481.323	2.7454	3.17728e-08
LOC_Os01g08860	266.525	30.3532	3.12864	3.20325e-08
LOC_Os07g03170	4.48923	91.9709	-4.32248	3.25517e-08
LOC_Os05g51240	2441.19	362.553	2.75086	3.31735e-08
LOC_Os04g58800	4858.86	734.938	2.7247	3.50821e-08
LOC_Os04g33660	8089.51	1235.92	2.71034	3.61796e-08
LOC_Os01g08700	7552	1154.65	2.70926	3.68786e-08
LOC_Os02g30540	19.0467	194.667	-3.34575	3.74879e-08
LOC_Os04g52990	26.8854	248.248	-3.20154	3.80761e-08
LOC_Os01g15900	358.349	2388.79	-2.73646	4.13884e-08
LOC_Os09g23460	6.72881	105.366	-3.94645	4.17944e-08
LOC_Os01g55720	114.231	8.92088	3.65864	4.23093e-08
LOC_Os02g41650	2572.21	16613.5	-2.69123	4.36294e-08
LOC_Os12g38720	2.24971	75.0038	-4.99033	4.42109e-08
LOC_Os06g15330	79.5164	582.233	-2.87053	4.56242e-08
LOC_Os06g34070	98.5532	6.24181	3.95202	4.73023e-08
LOC_Os03g15960	292.28	35.7113	3.02809	4.82609e-08
LOC_Os02g12420	22.4061	210.741	-3.22708	5.10609e-08
LOC_Os01g09830	1366.18	203.597	2.74553	5.10609e-08
LOC_Os08g04450	394.183	51.7855	2.92496	5.12391e-08
LOC_Os03g43430	471.45	63.3946	2.89199	5.12391e-08
LOC_Os09g14450	146.705	1011.77	-2.78496	5.15071e-08
LOC_Os02g07310	10.0882	131.263	-3.68693	5.24347e-08
LOC_Os08g09270	206.055	22.3161	3.19908	5.24607e-08
LOC_Os01g71740	1.38778e-17	48.2135	-8.60456	5.25363e-08
LOC_Os07g01820	2.24971	74.1107	-4.97308	5.31248e-08
LOC_Os06g43960	43.6825	346.479	-2.98442	5.3153e-08
LOC_Os03g50130	1266.51	188.416	2.74798	5.32953e-08
LOC_Os02g04650	1332.58	200.025	2.73514	5.61869e-08
LOC_Os11g18100	11.208	137.514	-3.60374	5.67867e-08
LOC_Os11g10520	20.1665	195.56	-3.27041	5.8756e-08
LOC_Os06g21740	13.4476	150.017	-3.46877	5.89209e-08
LOC_Os06g49070	643.9	91.9709	2.80576	5.96034e-08
LOC_Os05g09410	687.573	99.115	2.79264	6.16173e-08
LOC_Os01g52140	110.871	8.92088	3.61562	6.30613e-08
LOC_Os03g29410	11.208	135.728	-3.5849	6.34399e-08
LOC_Os06g20790	10.0882	129.477	-3.66719	6.58971e-08
LOC_Os02g41954	1.12998	65.1806	-5.71432	6.62475e-08
LOC_Os02g30190	1.12998	65.1806	-5.71432	6.62475e-08
LOC_Os08g10260	99.673	693.859	-2.79799	6.69262e-08
LOC_Os01g68460	12.3278	141.979	-3.51373	6.77405e-08
LOC_Os01g16290	1423.29	216.992	2.71274	6.77405e-08
LOC_Os12g11620	1.38778e-17	47.3204	-8.57767	6.77405e-08
LOC_Os03g20210	1.38778e-17	47.3204	-8.57767	6.77405e-08
LOC_Os07g09880	49.2816	1.38778e-17	8.63553	6.77405e-08
LOC_Os05g05030	309.077	40.1764	2.9393	7.5614e-08
LOC_Os02g52260	12317.9	1975.33	2.64051	7.84367e-08
LOC_Os09g04310	78.3966	556.336	-2.82534	7.96145e-08
LOC_Os02g02830	2854.4	450.068	2.66461	8.07665e-08
LOC_Os01g43120	791.715	117.868	2.74639	8.38647e-08
LOC_Os12g36440	3.36946	79.4688	-4.51414	8.38647e-08
LOC_Os06g04150	1935.04	302.721	2.67575	8.58296e-08
LOC_Os01g07500	380.745	51.7855	2.87493	8.75555e-08
LOC_Os01g01170	23.5259	209.848	-3.15095	8.76744e-08
LOC_Os11g41365	42.5627	328.618	-2.94547	8.78853e-08
LOC_Os03g03810	331.474	43.7484	2.9177	8.78853e-08
LOC_Os05g39540	48.1618	1.38778e-17	8.60245	8.89756e-08
LOC_Os09g04320	1.38778e-17	46.4274	-8.55026	8.89756e-08
LOC_Os08g40160	6796.13	1095.71	2.63269	8.91779e-08
LOC_Os07g05850	19.0467	183.951	-3.26412	9.18337e-08
LOC_Os04g41130	160.143	16.958	3.22905	9.65836e-08
LOC_Os08g43400	60.4797	437.566	-2.85269	9.7701e-08
LOC_Os10g34700	6.72881	99.115	-3.85833	9.78033e-08
LOC_Os08g01390	109.751	744.761	-2.7613	9.86059e-08
LOC_Os05g40010	1329.22	207.169	2.6809	9.91998e-08
LOC_Os02g57010	923.853	141.086	2.7099	1.00003e-07
LOC_Os05g43350	1.12998	63.3946	-5.67432	1.00003e-07
LOC_Os02g16070	31.3646	258.071	-3.03606	1.00003e-07
LOC_Os10g02410	61.5995	442.924	-2.84383	1.01014e-07
LOC_Os02g40690	1057.11	162.519	2.70042	1.0235e-07
LOC_Os11g41670	40.3231	312.544	-2.95092	1.04001e-07
LOC_Os08g01150	557.675	3475.58	-2.63952	1.04705e-07
LOC_Os04g40520	101.913	692.073	-2.76225	1.07201e-07
LOC_Os04g54759	119.83	10.7069	3.46788	1.10284e-07
LOC_Os01g71670	1.38778e-17	45.5344	-8.52232	1.16056e-07
LOC_Os05g23924	47.042	1.38778e-17	8.56859	1.16056e-07
LOC_Os12g42830	1.38778e-17	45.5344	-8.52232	1.16056e-07
LOC_Os08g09310	300.119	40.1764	2.89689	1.19846e-07
LOC_Os06g35850	1.12998	62.5016	-5.65389	1.24177e-07
novel.378	244.128	30.3532	3.00207	1.25849e-07
LOC_Os06g39120	8497.12	1402.02	2.59935	1.27109e-07
LOC_Os08g28670	469.21	67.8597	2.78713	1.27109e-07
LOC_Os04g49194	85.1155	580.447	-2.76807	1.34969e-07
LOC_Os06g11600	315.796	42.8554	2.87749	1.35092e-07
LOC_Os01g33460	5.60902	90.1849	-3.98011	1.36716e-07
LOC_Os04g09920	33.6042	265.215	-2.97627	1.37437e-07
LOC_Os11g10770	14.5675	148.231	-3.33705	1.37437e-07
LOC_Os07g18240	25.7656	216.099	-3.06268	1.38357e-07
LOC_Os10g07450	1703.24	273.252	2.63937	1.39201e-07
LOC_Os01g33770	4.48923	83.0408	-4.17535	1.39819e-07
LOC_Os10g27030	4.48923	83.0408	-4.17535	1.39819e-07
LOC_Os04g44100	85.1155	5.34877	3.95851	1.39819e-07
LOC_Os05g08480	3518.45	577.768	2.60609	1.43931e-07
LOC_Os11g44860	26.8854	226.815	-3.07135	1.50341e-07
LOC_Os05g49610	996.64	156.268	2.67199	1.50914e-07
LOC_Os11g25750	45.9221	1.38778e-17	8.53392	1.52132e-07
LOC_Os02g36264	160.143	1023.38	-2.67507	1.52647e-07
LOC_Os04g37980	15.6873	153.589	-3.28219	1.54594e-07
LOC_Os10g02300	12.3278	133.942	-3.42974	1.59533e-07
LOC_Os03g13800	1241.88	199.132	2.63989	1.60201e-07
LOC_Os08g01030	17.9269	171.449	-3.24953	1.62226e-07
LOC_Os10g02880	318.036	43.7484	2.85802	1.63446e-07
LOC_Os08g39430	1115.34	177.7	2.64904	1.64842e-07
LOC_Os01g11160	871.222	5234.81	-2.58687	1.65193e-07
LOC_Os09g37394	123.189	11.5999	3.39353	1.66372e-07
LOC_Os02g06588	160.143	1017.13	-2.66623	1.66896e-07
novel.467	346.031	49.1065	2.81348	1.78818e-07
LOC_Os09g30458	297.879	41.0694	2.85447	1.8174e-07
LOC_Os12g32280	146.705	16.065	3.18012	1.85579e-07
LOC_Os02g01590	10288.8	60608.5	-2.55843	1.87018e-07
LOC_Os01g51610	7.84861	100.901	-3.66541	1.87018e-07
LOC_Os01g12270	522.961	3146.06	-2.58852	1.87725e-07
LOC_Os04g51404	10.0882	120.547	-3.5642	1.87725e-07
LOC_Os01g53160	53.7608	1.77656	4.8178	1.96047e-07
LOC_Os03g55010	115.35	742.082	-2.68439	1.98625e-07
LOC_Os01g02610	1.38778e-17	43.7484	-8.46476	1.99378e-07
LOC_Os03g05590	44.8023	1.38778e-17	8.49839	1.99378e-07
LOC_Os07g25050	44.8023	1.38778e-17	8.49839	1.99378e-07
LOC_Os03g14910	366.188	2205.72	-2.59023	2.11711e-07
LOC_Os10g37660	175.82	20.5301	3.08989	2.11711e-07
LOC_Os03g64050	271.004	36.6043	2.88359	2.16618e-07
novel.680	12.3278	131.263	-3.40062	2.22049e-07
LOC_Os07g11970	25.7656	208.955	-3.01421	2.27805e-07
LOC_Os11g11020	363.948	52.6785	2.78525	2.28971e-07
LOC_Os03g35600	17.9269	166.984	-3.21149	2.31112e-07
LOC_Os05g35290	279.962	1693.14	-2.59592	2.3355e-07
LOC_Os03g63720	114.231	10.7069	3.39891	2.3355e-07
LOC_Os01g12360	3.36946	73.2177	-4.39615	2.44433e-07
LOC_Os02g41680	1047.03	6100.14	-2.54241	2.51755e-07
LOC_Os03g16910	1013.44	5903.68	-2.54223	2.53098e-07
LOC_Os01g41710	190564	32984.2	2.53042	2.53397e-07
LOC_Os12g01520	69.4382	464.356	-2.73947	2.55161e-07
LOC_Os12g37530	836.508	134.835	2.63195	2.57191e-07
novel.288	209.414	26.7812	2.96069	2.62998e-07
LOC_Os04g03850	1.38778e-17	41.9624	-8.40482	2.64018e-07
LOC_Os06g22290	1.38778e-17	41.9624	-8.40482	2.64018e-07
LOC_Os11g45990	220.612	1334.15	-2.59573	2.64018e-07
LOC_Os06g04900	6.72881	91.9709	-3.75055	2.72889e-07
LOC_Os07g03730	815.231	132.156	2.62371	2.75261e-07
LOC_Os01g64310	166.862	19.6371	3.07822	2.75261e-07
LOC_Os12g17600	291335	50720.2	2.52204	2.76165e-07
LOC_Os04g48880	7469.14	1295.75	2.52703	2.85326e-07
LOC_Os12g32660	16.8071	151.803	-3.16655	3.08013e-07
LOC_Os03g21080	316.916	1875.31	-2.56454	3.09057e-07
novel.214	11.208	122.333	-3.43515	3.09864e-07
LOC_Os01g16550	464.731	71.4317	2.69942	3.21332e-07
LOC_Os04g21820	388.584	2272.7	-2.54777	3.25283e-07
LOC_Os01g50100	264.285	1566.33	-2.56672	3.30417e-07
LOC_Os04g22080	40.3231	290.219	-2.84404	3.3965e-07
LOC_Os01g31870	159.023	967.12	-2.60362	3.41433e-07
LOC_Os09g09490	129.908	801.913	-2.62493	3.43437e-07
LOC_Os12g02210	42.5627	1.38778e-17	8.4246	3.53657e-07
LOC_Os12g03650	3.36946	71.4317	-4.36059	3.55508e-07
LOC_Os03g55164	245.248	33.9253	2.84883	3.61576e-07
LOC_Os09g27030	2740.18	475.072	2.52771	3.61906e-07
LOC_Os05g32770	91.8343	8.02786	3.49396	3.72253e-07
novel.60	2.24971	64.2876	-4.76833	3.72253e-07
LOC_Os05g07890	139.986	15.172	3.19435	3.84109e-07
LOC_Os12g05260	650.619	105.366	2.62483	3.91269e-07
LOC_Os03g25150	176.94	1059.1	-2.58076	3.97464e-07
LOC_Os07g07990	156.783	18.7441	3.05509	4.06525e-07
LOC_Os07g46020	50.4014	1.77656	4.72492	4.1356e-07
LOC_Os08g01380	117038	20911.6	2.48459	4.24886e-07
LOC_Os03g52640	451.293	70.5387	2.67522	4.28209e-07
LOC_Os12g24050	191.497	24.9952	2.93079	4.28538e-07
LOC_Os01g28580	6.72881	89.2919	-3.70797	4.35555e-07
LOC_Os03g60380	258.686	36.6043	2.81651	4.36512e-07
LOC_Os09g14490	208.295	1223.41	-2.55358	4.54519e-07
LOC_Os03g60090	1736.83	9722.18	-2.48475	4.54998e-07
LOC_Os12g34510	229.571	31.2462	2.87176	4.55699e-07
LOC_Os11g35450	2.24971	63.3946	-4.7482	4.57556e-07
LOC_Os12g42420	301.239	1739.57	-2.52932	4.57556e-07
LOC_Os09g25060	950.728	160.733	2.56335	4.57556e-07
novel.17	58.2401	2.66963	4.37968	4.60124e-07
LOC_Os11g25700	19.0467	165.198	-3.10911	4.66022e-07
LOC_Os09g09810	1.38778e-17	40.1764	-8.34227	4.6851e-07
LOC_Os04g14680	41.4429	1.38778e-17	8.38624	4.6851e-07
LOC_Os09g37540	42.5627	294.684	-2.78829	4.69058e-07
LOC_Os10g04690	22.4061	182.165	-3.017	4.69658e-07
LOC_Os12g09720	14.5675	136.621	-3.2195	4.69658e-07
LOC_Os03g08460	35.8439	260.75	-2.85901	4.75187e-07
LOC_Os11g44750	5.60902	82.1478	-3.84565	4.89101e-07
LOC_Os07g08390	498.325	2821.9	-2.50125	4.93754e-07
LOC_Os02g54560	89.5947	8.02786	3.45838	5.03531e-07
LOC_Os04g29580	33.6042	242.89	-2.84948	5.09952e-07
LOC_Os01g05770	3.36946	69.6457	-4.32413	5.14986e-07
LOC_Os03g18870	136.627	16.065	3.07752	5.23183e-07
LOC_Os03g09910	23.5259	185.737	-2.97498	5.3853e-07
LOC_Os02g50640	63.8391	3.56269	4.11289	5.59887e-07
LOC_Os11g27329	2.24971	62.5016	-4.72777	5.59887e-07
LOC_Os08g39830	118.71	12.493	3.23432	5.6147e-07
LOC_Os01g60830	24026.6	4366.81	2.45995	5.62341e-07
LOC_Os03g04340	630.463	104.473	2.5917	5.6433e-07
novel.168	1.12998	55.3575	-5.47917	5.74924e-07
LOC_Os03g56940	40.3231	1.38778e-17	8.34683	6.30907e-07
LOC_Os02g15750	8751.32	1597.58	2.45351	6.3603e-07
LOC_Os06g43950	36.9637	260.75	-2.81477	6.63327e-07
LOC_Os04g53000	148.945	872.461	-2.54943	6.69178e-07
LOC_Os06g48520	4.48923	74.1107	-4.01149	6.69178e-07
novel.730	49.2816	1.77656	4.69258	6.86825e-07
LOC_Os05g31160	1290.03	227.708	2.50143	6.92209e-07
LOC_Os07g38260	71.6778	445.603	-2.63429	6.92209e-07
LOC_Os10g24980	123.189	13.386	3.18911	6.97813e-07
LOC_Os08g31140	56.0004	2.66963	4.32322	7.29508e-07
LOC_Os01g04230	56.0004	2.66963	4.32322	7.29508e-07
LOC_Os07g30600	1.12998	54.4645	-5.45577	7.29508e-07
LOC_Os01g03320	430.017	69.6457	2.62391	7.33694e-07
LOC_Os09g36930	1715.56	308.079	2.47678	7.52045e-07
LOC_Os09g37330	17.9269	154.482	-3.09932	7.62916e-07
LOC_Os01g51754	115.35	681.357	-2.56124	7.62952e-07
LOC_Os07g08840	27164.3	5034.78	2.43168	7.68358e-07
LOC_Os08g12880	293.4	44.6414	2.71268	7.70572e-07
LOC_Os05g35520	122.069	13.386	3.17595	7.83627e-07
LOC_Os06g07200	47.042	312.544	-2.72916	7.99738e-07
LOC_Os05g42110	133.267	15.172	3.12345	8.10876e-07
LOC_Os10g17690	6.72881	84.8269	-3.63407	8.11757e-07
LOC_Os03g01020	8231.73	1526.14	2.4312	8.11757e-07
LOC_Os04g30010	68.3183	425.063	-2.63538	8.13502e-07
LOC_Os05g49320	281.082	42.8554	2.70955	8.15289e-07
LOC_Os05g47660	20.1665	164.305	-3.01936	8.38628e-07
LOC_Os09g29690	1.38778e-17	38.3903	-8.27689	8.42672e-07
LOC_Os07g15930	1.38778e-17	38.3903	-8.27689	8.42672e-07
LOC_Os12g08550	29.125	213.42	-2.86862	8.56486e-07
LOC_Os05g48390	1066.07	5746.51	-2.43026	8.57965e-07
LOC_Os01g12350	15.6873	135.728	-3.104	8.57965e-07
LOC_Os03g11210	120.949	13.386	3.16267	8.75634e-07
LOC_Os11g46950	12.3278	119.654	-3.26717	8.75634e-07
LOC_Os04g39610	54.8806	2.66963	4.29413	9.13551e-07
LOC_Os04g41380	1.12998	53.5715	-5.43198	9.13551e-07
LOC_Os02g28980	3508.37	649.209	2.4338	9.18828e-07
LOC_Os12g42876	3671.86	19580.1	-2.41477	9.29918e-07
LOC_Os04g40530	886.899	157.161	2.49549	9.30257e-07
LOC_Os02g13560	7502.73	1403.8	2.41796	9.37847e-07
LOC_Os02g06950	6.72881	83.9339	-3.61883	9.45667e-07
LOC_Os05g17604	21.2863	167.877	-2.97282	9.48634e-07
LOC_Os03g51200	136.627	16.958	3.0001	9.49471e-07
LOC_Os03g52794	443.454	2410.22	-2.44202	9.75699e-07
LOC_Os01g48620	174.7	987.659	-2.49838	9.8006e-07
LOC_Os11g40460	12.3278	117.868	-3.2455	9.80879e-07
LOC_Os09g27590	119.83	13.386	3.14926	9.80879e-07
LOC_Os07g46846	216.133	1204.66	-2.47803	9.82847e-07
LOC_Os02g53420	4347.11	810.843	2.42236	9.9217e-07
LOC_Os10g41838	131.028	15.172	3.09902	9.93303e-07
LOC_Os08g41720	36.9637	252.713	-2.76963	1.03925e-06
LOC_Os05g47650	113.111	656.353	-2.53557	1.0464e-06
LOC_Os08g34700	1133.26	204.49	2.46958	1.05402e-06
LOC_Os09g26670	3306.81	617.953	2.41961	1.08074e-06
LOC_Os05g45954	107.512	11.5999	3.19734	1.08074e-06
LOC_Os02g44980	621.504	3330.92	-2.42188	1.08074e-06
LOC_Os02g18080	181.419	1010.88	-2.47749	1.11882e-06
LOC_Os12g12390	365.068	59.8226	2.60664	1.12185e-06
LOC_Os01g05080	797.314	141.979	2.48832	1.12269e-06
LOC_Os06g46180	1.38778e-17	37.4973	-8.24305	1.12439e-06
novel.606	39.2033	1.38778e-17	8.30632	1.12439e-06
LOC_Os05g04160	5.60902	76.7898	-3.74851	1.12508e-06
LOC_Os04g10800	8.96841	100.008	-3.46277	1.1302e-06
LOC_Os07g39740	716.688	126.798	2.49752	1.14387e-06
LOC_Os06g36070	1218.36	222.35	2.45331	1.19336e-06
LOC_Os04g24510	35.8439	244.676	-2.76727	1.21412e-06
LOC_Os01g12900	284.442	44.6414	2.66796	1.21412e-06
LOC_Os01g18584	508.403	2706.7	-2.41224	1.27607e-06
LOC_Os12g43570	2.24971	58.0366	-4.62108	1.29785e-06
LOC_Os02g39850	773.798	4083.72	-2.39969	1.32361e-06
LOC_Os06g30480	150.064	19.6371	2.92527	1.33158e-06
LOC_Os03g02020	1791.7	335.762	2.41534	1.39742e-06
LOC_Os03g37260	212.774	31.2462	2.7622	1.42133e-06
LOC_Os06g08090	234.05	35.7113	2.70769	1.42215e-06
LOC_Os01g55270	375.146	62.5016	2.58285	1.42215e-06
LOC_Os02g30650	493.846	85.7199	2.52445	1.44766e-06
LOC_Os11g32500	8380.66	1613.66	2.37663	1.44766e-06
LOC_Os05g27020	1.12998	50.8925	-5.35815	1.45611e-06
LOC_Os01g20206	7.84861	87.5059	-3.46021	1.45611e-06
LOC_Os05g01030	176.94	973.371	-2.459	1.45611e-06
LOC_Os04g30160	44.8023	289.326	-2.68804	1.45806e-06
LOC_Os01g08930	555.435	97.329	2.511	1.49064e-06
LOC_Os07g14700	8.96841	98.222	-3.43681	1.49565e-06
LOC_Os09g02420	64.9589	392.022	-2.59129	1.51754e-06
LOC_Os10g21020	455.772	78.5758	2.53407	1.51965e-06
LOC_Os03g38570	1.38778e-17	36.6043	-8.2084	1.51965e-06
LOC_Os04g32080	38.0835	1.38778e-17	8.26463	1.51965e-06
LOC_Os01g62740	38.0835	1.38778e-17	8.26463	1.51965e-06
LOC_Os01g16980	2295.62	435.78	2.39684	1.51965e-06
LOC_Os05g01140	3287.77	628.67	2.38648	1.53458e-06
LOC_Os08g43450	5.60902	75.0038	-3.71462	1.59035e-06
LOC_Os01g08220	132.147	16.958	2.95205	1.60586e-06
LOC_Os03g39830	4726.72	913.539	2.37113	1.60586e-06
LOC_Os12g07810	125.429	699.217	-2.47784	1.61232e-06
LOC_Os03g20640	1839.86	349.158	2.39718	1.62121e-06
LOC_Os07g40520	47.042	297.363	-2.65735	1.63422e-06
LOC_Os05g38140	3800.64	733.152	2.37384	1.68112e-06
novel.382	7.84861	86.6129	-3.44544	1.68661e-06
LOC_Os05g39560	98.5532	10.7069	3.18617	1.70959e-06
LOC_Os04g11400	22332.4	4365.91	2.35474	1.73543e-06
LOC_Os10g41710	1931.68	368.804	2.3885	1.76603e-06
LOC_Os03g04720	63.8391	381.306	-2.57636	1.90622e-06
LOC_Os06g03800	215.013	1149.29	-2.41765	1.90699e-06
LOC_Os10g42960	511.763	2655.8	-2.37535	1.92111e-06
LOC_Os01g48610	100.793	568.838	-2.49533	1.92963e-06
LOC_Os03g44540	203.815	1092.14	-2.42119	1.93258e-06
LOC_Os02g47890	41.4429	263.429	-2.66497	1.93259e-06
LOC_Os01g45250	180.299	969.799	-2.42658	1.93345e-06
LOC_Os01g47610	198.216	29.4602	2.74455	1.94661e-06
LOC_Os06g51330	170.221	918.005	-2.43033	1.97296e-06
LOC_Os05g47860	69.4382	5.34877	3.66526	1.97435e-06
LOC_Os04g03180	30.2448	206.276	-2.76531	1.98832e-06
LOC_Os08g39460	129.908	16.958	2.92742	1.98924e-06
LOC_Os09g19280	185.898	998.375	-2.42437	1.99966e-06
LOC_Os07g36390	1105.26	208.955	2.40235	2.03774e-06
LOC_Os09g29840	3297.85	642.958	2.35848	2.0383e-06
LOC_Os12g11860	33.6042	221.457	-2.71628	2.0383e-06
LOC_Os01g52070	274.363	44.6414	2.61593	2.05319e-06
novel.405	36.9637	1.38778e-17	8.22171	2.05749e-06
LOC_Os02g44280	118.71	14.279	3.04345	2.07865e-06
LOC_Os01g64360	139.986	18.7441	2.89173	2.08913e-06
LOC_Os03g48780	253.087	40.1764	2.65109	2.12045e-06
LOC_Os12g01530	28126.3	5575.05	2.33483	2.12045e-06
LOC_Os09g26710	75.0372	6.24181	3.55924	2.25262e-06
LOC_Os05g38130	134.387	17.8511	2.9028	2.27118e-06
LOC_Os02g22580	348.271	59.8226	2.53871	2.27118e-06
LOC_Os01g37630	1458	280.396	2.37788	2.27927e-06
LOC_Os07g47400	362.828	62.5016	2.5347	2.27995e-06
LOC_Os03g20949	171.341	912.646	-2.41244	2.31612e-06
LOC_Os11g10870	226.211	35.7113	2.65857	2.33479e-06
LOC_Os04g48390	1069.43	5396.45	-2.33505	2.34187e-06
LOC_Os12g10180	87.3551	491.146	-2.48969	2.34187e-06
LOC_Os03g64030	101.913	11.5999	3.12027	2.36711e-06
LOC_Os09g30466	184.779	27.6742	2.73314	2.37038e-06
LOC_Os02g44500	8076.07	1607.41	2.32882	2.37038e-06
LOC_Os07g03130	416.579	73.2177	2.5061	2.38996e-06
LOC_Os01g06210	14.5675	121.44	-3.04973	2.39304e-06
LOC_Os05g04584	1138.86	5734	-2.33185	2.39304e-06
LOC_Os03g17200	271.004	44.6414	2.59817	2.39457e-06
LOC_Os02g39570	846.586	159.84	2.40402	2.41473e-06
LOC_Os10g33550	11.208	105.366	-3.21999	2.44916e-06
LOC_Os03g55350	57.1202	3.56269	3.95275	2.44916e-06
LOC_Os03g56600	2.24971	55.3575	-4.55305	2.44916e-06
LOC_Os01g45274	189317	37948.4	2.31869	2.45151e-06
LOC_Os08g37030	163.502	24.1021	2.75513	2.46119e-06
LOC_Os08g36500	83.9957	474.179	-2.49549	2.46171e-06
LOC_Os10g17790	43.6825	1.77656	4.51901	2.47547e-06
LOC_Os09g36040	3487.1	689.394	2.33839	2.47785e-06
LOC_Os02g56334	40.3231	252.713	-2.6445	2.49688e-06
LOC_Os04g53850	12.3278	109.831	-3.14373	2.52278e-06
LOC_Os07g29810	51.5212	308.079	-2.57749	2.53006e-06
LOC_Os08g34280	893.618	4494.51	-2.33029	2.58565e-06
LOC_Os04g32110	72.7976	417.026	-2.51637	2.63557e-06
LOC_Os01g56330	122.069	15.172	2.99694	2.66243e-06
LOC_Os11g27540	100.793	11.5999	3.10434	2.67744e-06
LOC_Os03g04570	94.074	519.722	-2.46449	2.76176e-06
LOC_Os08g35490	35.8439	1.38778e-17	8.17746	2.76797e-06
LOC_Os04g42760	35.8439	1.38778e-17	8.17746	2.76797e-06
LOC_Os01g22000	35.8439	1.38778e-17	8.17746	2.76797e-06
LOC_Os09g25690	35.8439	1.38778e-17	8.17746	2.76797e-06
LOC_Os01g74160	815.231	4082.83	-2.32413	2.81672e-06
LOC_Os07g03890	502.804	2539.71	-2.33634	2.83686e-06
LOC_Os04g58200	1113.1	216.099	2.36408	2.89102e-06
LOC_Os06g09950	6.72881	76.7898	-3.4907	2.89102e-06
LOC_Os08g39860	162.382	24.1021	2.74522	2.91824e-06
LOC_Os01g41820	68.3183	389.343	-2.50878	2.94788e-06
LOC_Os05g27050	68.3183	389.343	-2.50878	2.94788e-06
LOC_Os10g10175	104.152	566.159	-2.44127	3.02403e-06
LOC_Os12g02320	26830.6	5450.03	2.29952	3.03439e-06
novel.614	2.24971	54.4645	-4.52965	3.03439e-06
LOC_Os09g37320	2.24971	54.4645	-4.52965	3.03439e-06
LOC_Os10g04720	271.004	1386.83	-2.35494	3.04425e-06
LOC_Os03g27770	305.718	52.6785	2.53381	3.04425e-06
LOC_Os11g28540	10.0882	98.222	-3.26908	3.04425e-06
LOC_Os12g39620	508.403	2551.32	-2.32695	3.0563e-06
novel.63	135.507	18.7441	2.84485	3.07766e-06
LOC_Os02g40240	14919.2	73279.4	-2.29623	3.08364e-06
LOC_Os03g13560	562.154	104.473	2.42629	3.08364e-06
LOC_Os07g33780	384.105	1936.93	-2.33387	3.16986e-06
LOC_Os08g32960	610.306	114.296	2.41535	3.17783e-06
LOC_Os11g08020	53.7608	317.009	-2.55744	3.31686e-06
LOC_Os02g18070	387.464	1944.97	-2.32728	3.3464e-06
LOC_Os07g03710	8.96841	91.9709	-3.34208	3.38658e-06
LOC_Os01g29220	33.6042	213.42	-2.66299	3.38658e-06
LOC_Os02g56930	67.1985	5.34877	3.61804	3.40153e-06
LOC_Os05g47850	204.935	33.0323	2.62821	3.40153e-06
LOC_Os07g10060	106.392	569.731	-2.41968	3.50004e-06
LOC_Os02g52270	723.407	138.407	2.38473	3.51252e-06
LOC_Os03g63310	282.202	1427.02	-2.33776	3.52145e-06
LOC_Os10g37180	16414.2	3366.64	2.28552	3.54122e-06
LOC_Os06g49160	4001.09	812.629	2.29953	3.55439e-06
LOC_Os08g37130	531.919	100.008	2.40948	3.58402e-06
LOC_Os12g40010	12.3278	107.152	-3.10815	3.63153e-06
LOC_Os11g42500	60.4797	4.45574	3.72284	3.63153e-06
LOC_Os11g47220	13.4476	112.51	-3.05413	3.68178e-06
LOC_Os06g06290	7058.17	1447.56	2.28556	3.69069e-06
LOC_Os02g48690	5.60902	70.5387	-3.62623	3.74572e-06
LOC_Os12g42910	16.8071	126.798	-2.90713	3.75956e-06
LOC_Os09g13400	1.38778e-17	33.0323	-8.06083	3.75956e-06
LOC_Os01g61070	666.297	127.691	2.38225	3.75956e-06
LOC_Os04g51660	54.8806	3.56269	3.89517	3.75956e-06
LOC_Os01g16200	54.8806	3.56269	3.89517	3.75956e-06
LOC_Os09g28390	3260.89	663.497	2.29687	3.79191e-06
LOC_Os10g41550	297.879	1495.78	-2.32768	3.82002e-06
LOC_Os03g56580	32.4844	206.276	-2.66262	3.86381e-06
LOC_Os11g02424	6049.22	1243.95	2.28169	3.87039e-06
LOC_Os09g29130	291.16	50.8925	2.51308	3.88077e-06
LOC_Os05g45210	195.977	1001.05	-2.35212	3.88345e-06
LOC_Os10g30560	241.889	1222.52	-2.33692	3.95387e-06
LOC_Os03g25960	402.022	73.2177	2.45479	3.99726e-06
LOC_Os01g39110	51.5212	298.256	-2.53076	4.0207e-06
LOC_Os10g38610	734.605	142.872	2.36112	4.0415e-06
LOC_Os09g09500	41.4429	249.141	-2.58456	4.10204e-06
LOC_Os06g50724	13.4476	110.724	-3.03107	4.1199e-06
LOC_Os02g40180	152.304	784.946	-2.3648	4.1199e-06
LOC_Os01g44394	117.59	16.065	2.86124	4.13556e-06
LOC_Os06g16980	699.891	135.728	2.36523	4.13556e-06
LOC_Os10g06690	41.4429	1.77656	4.44328	4.20384e-06
LOC_Os11g25040	468.09	87.5059	2.41749	4.20966e-06
LOC_Os04g12010	96.3136	513.471	-2.41314	4.36769e-06
LOC_Os04g09580	129.908	675.999	-2.37855	4.39507e-06
LOC_Os01g18670	193.737	983.194	-2.34272	4.39507e-06
LOC_Os06g05030	3.36946	58.0366	-4.06161	4.43306e-06
LOC_Os03g50870	11188	2328.96	2.26413	4.43491e-06
LOC_Os02g02540	56.0004	319.688	-2.51082	4.43491e-06
LOC_Os04g14260	5.60902	69.6457	-3.60788	4.43491e-06
LOC_Os03g02685	1413.21	285.754	2.30557	4.55361e-06
LOC_Os03g45400	885.779	175.914	2.33117	4.61619e-06
LOC_Os05g03920	12.3278	105.366	-3.08393	4.61619e-06
LOC_Os03g08320	16.8071	125.012	-2.88669	4.61619e-06
LOC_Os07g03950	26.8854	179.486	-2.73393	4.61771e-06
LOC_Os03g02460	53.7608	3.56269	3.86549	4.68075e-06
LOC_Os02g02490	48.1618	2.66963	4.10614	4.6982e-06
LOC_Os09g09520	555.435	2695.09	-2.27842	4.85531e-06
LOC_Os01g07880	1263.15	255.392	2.30563	4.91218e-06
LOC_Os03g26820	1771.55	362.553	2.28831	4.91218e-06
LOC_Os12g04980	1.38778e-17	32.1393	-8.02145	5.13482e-06
LOC_Os02g49790	33.6042	1.38778e-17	8.08468	5.13482e-06
LOC_Os07g23570	1.38778e-17	32.1393	-8.02145	5.13482e-06
LOC_Os01g34410	33.6042	1.38778e-17	8.08468	5.13482e-06
LOC_Os11g45924	58.2401	325.939	-2.48228	5.19972e-06
LOC_Os07g20340	96.3136	11.5999	3.03884	5.19972e-06
LOC_Os01g42234	40.3231	240.211	-2.57134	5.19972e-06
LOC_Os04g08824	14.5675	114.296	-2.96236	5.20009e-06
LOC_Os04g47180	62.7193	344.693	-2.45626	5.20009e-06
LOC_Os02g17090	12.3278	104.473	-3.07167	5.22304e-06
LOC_Os11g12290	29.125	187.523	-2.68211	5.23854e-06
LOC_Os09g04508	108.631	563.48	-2.37375	5.27854e-06
LOC_Os03g01350	584.55	2815.65	-2.26785	5.27854e-06
novel.513	60.4797	334.869	-2.46693	5.28962e-06
LOC_Os02g53530	521.841	100.901	2.36908	5.31531e-06
LOC_Os12g07270	150.064	22.3161	2.74193	5.35615e-06
LOC_Os06g05710	3.36946	57.1436	-4.03929	5.42262e-06
LOC_Os04g01470	19.0467	138.407	-2.85407	5.50062e-06
novel.169	354.99	65.1806	2.44278	5.51205e-06
LOC_Os04g37520	6.72881	73.2177	-3.4221	5.55727e-06
LOC_Os12g16250	78.3966	418.812	-2.4158	5.57142e-06
LOC_Os12g36940	183.659	914.432	-2.31516	5.64367e-06
LOC_Os11g35890	154.544	776.909	-2.32891	5.67264e-06
LOC_Os04g35870	173.58	866.21	-2.31839	5.72428e-06
LOC_Os12g01140	225.092	1110	-2.30142	5.78826e-06
LOC_Os02g20210	2.24971	51.7855	-4.45706	5.84294e-06
LOC_Os11g10560	85.1155	9.8139	3.09898	5.84294e-06
novel.648	1.12998	45.5344	-5.1981	6.015e-06
LOC_Os01g32710	16.8071	122.333	-2.85547	6.40102e-06
LOC_Os03g56800	204.935	34.8183	2.55254	6.5759e-06
LOC_Os10g36550	1491.6	6995.83	-2.22955	6.58616e-06
LOC_Os01g51634	20.1665	141.086	-2.79976	6.61552e-06
LOC_Os05g20450	19.0467	135.728	-2.8259	6.74971e-06
LOC_Os08g06550	9563.18	2046.77	2.22407	6.74971e-06
LOC_Os01g04950	350.51	1680.63	-2.26112	6.74971e-06
LOC_Os04g54002	91.8343	478.644	-2.38046	6.74971e-06
LOC_Os02g15860	3135.48	666.176	2.23447	7.09394e-06
novel.183	32.4844	1.38778e-17	8.03596	7.11629e-06
LOC_Os03g05680	90.7145	467.928	-2.36548	7.12371e-06
LOC_Os07g43470	1091.82	225.922	2.27214	7.15694e-06
LOC_Os03g06630	9494.87	2041.41	2.21751	7.2291e-06
LOC_Os06g35730	352.75	66.9667	2.39473	7.29004e-06
LOC_Os02g51110	677.495	136.621	2.30886	7.4724e-06
LOC_Os06g36710	92.9542	480.43	-2.36836	7.56495e-06
LOC_Os01g71190	7530.73	1623.48	2.2136	7.64502e-06
novel.370	239.649	42.8554	2.47958	7.75948e-06
LOC_Os06g45710	341.552	64.2876	2.40699	7.84566e-06
LOC_Os03g37960	72.7976	7.13483	3.32647	7.94857e-06
LOC_Os08g41630	16.8071	120.547	-2.83428	8.01602e-06
LOC_Os12g27440	489.367	96.436	2.34162	8.09904e-06
LOC_Os10g12354	557.675	111.617	2.31944	8.12701e-06
LOC_Os04g57310	4226.17	911.753	2.21246	8.15236e-06
LOC_Os01g06876	29.125	181.272	-2.63324	8.29092e-06
LOC_Os04g39320	716.688	3337.17	-2.21903	8.36134e-06
LOC_Os02g09490	589.03	2754.03	-2.22492	8.36134e-06
LOC_Os06g47800	111.991	15.172	2.87274	8.38816e-06
LOC_Os01g13690	13929.3	3037.12	2.1973	8.78023e-06
LOC_Os03g61030	422.178	83.0408	2.34404	8.79852e-06
LOC_Os11g43750	90.7145	459.891	-2.34049	9.195e-06
LOC_Os10g36610	148.945	23.2091	2.67485	9.25464e-06
LOC_Os08g16600	529.68	106.259	2.31604	9.33645e-06
LOC_Os02g32550	67.1985	6.24181	3.40032	9.33645e-06
LOC_Os07g23640	67.1985	6.24181	3.40032	9.33645e-06
LOC_Os07g46930	67.1985	6.24181	3.40032	9.33645e-06
LOC_Os03g10350	30.2448	183.951	-2.60017	9.40817e-06
LOC_Os08g39550	50.4014	3.56269	3.7726	9.42351e-06
LOC_Os10g04540	81.7561	9.8139	3.04096	9.44177e-06
LOC_Os05g43390	26.8854	170.556	-2.66036	9.44177e-06
LOC_Os11g29870	76.157	394.701	-2.37204	9.44177e-06
LOC_Os03g46300	157.903	25.8882	2.60231	9.47027e-06
LOC_Os05g01570	7.84861	75.0038	-3.23816	9.47027e-06
LOC_Os01g21250	20525	4507.9	2.18682	9.61182e-06
LOC_Os07g10970	81.7561	417.026	-2.34919	9.70922e-06
LOC_Os02g07360	692.052	142.872	2.27505	9.72974e-06
LOC_Os06g50950	39.2033	0.883542	5.27248	9.82672e-06
LOC_Os02g43540	414.339	82.1478	2.33258	9.82726e-06
LOC_Os04g58390	646.14	2980.86	-2.20562	9.82726e-06
LOC_Os01g05760	1.38778e-17	30.3532	-7.93932	9.82726e-06
LOC_Os10g26500	1.38778e-17	30.3532	-7.93932	9.82726e-06
LOC_Os12g05220	31.3646	1.38778e-17	7.98553	9.82726e-06
LOC_Os04g30090	1.38778e-17	30.3532	-7.93932	9.82726e-06
LOC_Os04g37970	1.38778e-17	30.3532	-7.93932	9.82726e-06
LOC_Os03g03720	108886	24007.7	2.18124	9.90362e-06
LOC_Os05g48150	44.8023	2.66963	4.00209	1.00256e-05
LOC_Os11g26880	44.8023	2.66963	4.00209	1.00256e-05
LOC_Os10g19334	1.12998	43.7484	-5.14054	1.00256e-05
LOC_Os11g39450	11.208	93.757	-3.05181	1.01982e-05
LOC_Os02g53200	226.211	40.1764	2.4892	1.0234e-05
LOC_Os07g32590	349.391	67.8597	2.36186	1.02589e-05
LOC_Os01g04550	29.125	177.7	-2.60455	1.03032e-05
LOC_Os12g44230	56.0004	300.935	-2.42364	1.05149e-05
LOC_Os11g40970	193.737	925.149	-2.25494	1.05912e-05
LOC_Os03g48920	1725.64	372.376	2.21188	1.05912e-05
LOC_Os03g15050	2397.52	10849.2	-2.17792	1.07274e-05
LOC_Os04g05700	4.48923	58.9296	-3.68147	1.08656e-05
LOC_Os12g10740	712.209	3256.8	-2.19291	1.08798e-05
LOC_Os02g13460	64.9589	341.121	-2.39071	1.08814e-05
LOC_Os11g47000	75.0372	385.771	-2.36037	1.09811e-05
LOC_Os01g22710	76.157	8.02786	3.22427	1.1088e-05
LOC_Os07g28030	12.3278	98.222	-2.98277	1.12992e-05
LOC_Os03g01320	15.6873	112.51	-2.83363	1.1499e-05
LOC_Os11g12340	426.657	1961.04	-2.20018	1.15155e-05
LOC_Os06g20150	39.2033	222.35	-2.50045	1.15646e-05
LOC_Os09g21460	151.184	24.9952	2.59	1.15646e-05
LOC_Os11g01530	23845.2	5308.93	2.16718	1.15646e-05
LOC_Os02g40200	219.493	1031.42	-2.23182	1.16283e-05
LOC_Os07g17280	20.1665	134.835	-2.73444	1.17276e-05
LOC_Os04g49160	20.1665	134.835	-2.73444	1.17276e-05
LOC_Os05g26070	2.24971	48.2135	-4.35422	1.17276e-05
LOC_Os07g44780	49.2816	3.56269	3.74026	1.17276e-05
LOC_Os04g08828	825.309	3742.59	-2.18088	1.18409e-05
LOC_Os01g52160	108.631	15.172	2.82885	1.18601e-05
LOC_Os01g67320	1675.24	7529.84	-2.16818	1.20483e-05
LOC_Os04g41570	671.896	141.086	2.25054	1.21028e-05
LOC_Os04g41510	33.6042	194.667	-2.53038	1.21121e-05
LOC_Os01g47400	117.59	17.8511	2.71035	1.23316e-05
LOC_Os09g17740	247078	55396.9	2.15709	1.25426e-05
LOC_Os03g13950	929.452	199.132	2.22187	1.25927e-05
LOC_Os04g46280	804.033	170.556	2.23609	1.25974e-05
LOC_Os06g02380	8089.51	1808.33	2.16131	1.2703e-05
LOC_Os08g33710	624.864	130.37	2.25972	1.2703e-05
LOC_Os07g02060	3.36946	53.5715	-3.94639	1.2703e-05
LOC_Os05g39790	54.8806	4.45574	3.58297	1.2703e-05
LOC_Os03g55530	793.955	168.77	2.23307	1.28106e-05
LOC_Os10g30610	106.392	520.615	-2.28965	1.28129e-05
LOC_Os01g33869	1.12998	41.9624	-5.0806	1.28776e-05
LOC_Os08g29030	1.12998	36.6043	-4.88418	1.28776e-05
LOC_Os08g39330	38.0835	1.77656	4.32167	1.28776e-05
LOC_Os04g46680	1.12998	36.6043	-4.88418	1.28776e-05
LOC_Os01g04630	1078.39	233.066	2.20939	1.29503e-05
LOC_Os09g10010	75.0372	8.02786	3.20293	1.29581e-05
LOC_Os02g26670	60.4797	314.33	-2.37565	1.30367e-05
LOC_Os06g49060	69.4382	7.13483	3.25841	1.31851e-05
LOC_Os04g44870	94.074	12.493	2.89911	1.32269e-05
LOC_Os05g44100	226.211	1051.96	-2.21678	1.32359e-05
LOC_Os11g43990	152.304	723.329	-2.24688	1.32758e-05
LOC_Os02g48850	30.2448	1.38778e-17	7.93327	1.34893e-05
LOC_Os05g12640	30.2448	1.38778e-17	7.93327	1.34893e-05
LOC_Os11g14000	30.2448	1.38778e-17	7.93327	1.34893e-05
LOC_Os07g39440	30.2448	1.38778e-17	7.93327	1.34893e-05
LOC_Os02g39660	60.4797	313.437	-2.37155	1.35792e-05
LOC_Os11g02389	9783.78	2200.37	2.15258	1.35792e-05
LOC_Os06g05440	352.75	1611.87	-2.19167	1.36788e-05
LOC_Os03g05360	50.4014	267.894	-2.40758	1.38445e-05
LOC_Os05g43040	1902.57	420.598	2.17706	1.40465e-05
LOC_Os06g01790	1119.82	243.783	2.19896	1.40824e-05
LOC_Os12g17910	5322.46	1196.62	2.153	1.40851e-05
LOC_Os11g04894	83.9957	10.7069	2.95587	1.42368e-05
LOC_Os12g11550	32.4844	187.523	-2.52521	1.42897e-05
LOC_Os06g39960	1174.69	256.285	2.19585	1.45128e-05
LOC_Os03g60580	499.445	103.58	2.26805	1.47061e-05
LOC_Os06g12460	882.42	190.202	2.21311	1.49414e-05
LOC_Os02g40730	25.7656	155.375	-2.58709	1.49498e-05
LOC_Os11g46900	853.305	3799.75	-2.15463	1.51508e-05
LOC_Os07g47280	7.84861	72.3247	-3.18578	1.52942e-05
LOC_Os10g36860	188.138	33.9253	2.46658	1.53783e-05
LOC_Os07g01740	188.138	33.9253	2.46658	1.53783e-05
LOC_Os03g48370	17.9269	123.226	-2.77351	1.54646e-05
LOC_Os02g49760	262.045	1198.41	-2.19276	1.55631e-05
LOC_Os05g43310	4658.42	1053.74	2.14417	1.55703e-05
LOC_Os04g10010	3.36946	52.6785	-3.92219	1.56574e-05
LOC_Os01g62870	4852.14	1098.39	2.14309	1.56579e-05
LOC_Os04g42650	63.8391	6.24181	3.32646	1.59736e-05
LOC_Os12g05080	133.267	630.456	-2.24114	1.5983e-05
LOC_Os06g45950	4.48923	57.1436	-3.63717	1.5983e-05
LOC_Os07g10910	15.6873	108.938	-2.78714	1.5983e-05
LOC_Os04g26360	15.6873	108.938	-2.78714	1.5983e-05
LOC_Os01g05650	29454.4	6718.1	2.13233	1.60195e-05
LOC_Os06g39110	3083.96	694.752	2.14999	1.60884e-05
LOC_Os04g52190	562.154	2508.45	-2.15754	1.61192e-05
LOC_Os01g64960	100720	23004.8	2.13034	1.6127e-05
LOC_Os02g10794	19.0467	127.691	-2.73792	1.62364e-05
LOC_Os08g42210	248.608	47.3204	2.38994	1.63604e-05
LOC_Os03g10820	42.5627	2.66963	3.92829	1.65067e-05
LOC_Os02g32504	284.442	55.3575	2.35839	1.65624e-05
LOC_Os01g02080	433.376	89.2919	2.27725	1.66812e-05
LOC_Os12g32750	36.9637	1.77656	4.27875	1.70896e-05
LOC_Os09g25320	12639.3	2893.34	2.12705	1.724e-05
LOC_Os11g07720	11.208	90.1849	-2.99585	1.72823e-05
LOC_Os08g43190	3077.25	697.431	2.14129	1.76818e-05
LOC_Os05g38040	636.062	136.621	2.21784	1.77172e-05
LOC_Os07g03025	135.507	634.028	-2.22527	1.77172e-05
LOC_Os05g13370	208.295	38.3903	2.4356	1.77312e-05
LOC_Os05g47880	40.3231	218.778	-2.43659	1.79631e-05
LOC_Os07g06130	10.0882	85.7199	-3.07295	1.82337e-05
LOC_Os12g32190	6.72881	66.0737	-3.27427	1.8747e-05
LOC_Os06g21240	1.38778e-17	28.5672	-7.85222	1.88207e-05
LOC_Os01g34560	1.38778e-17	28.5672	-7.85222	1.88207e-05
LOC_Os10g35830	1.38778e-17	28.5672	-7.85222	1.88207e-05
LOC_Os02g37780	1.38778e-17	28.5672	-7.85222	1.88207e-05
LOC_Os09g20500	23.5259	142.872	-2.59676	1.95749e-05
LOC_Os10g40950	4.48923	56.2505	-3.6145	1.96358e-05
novel.739	237.41	45.5344	2.37883	1.97014e-05
LOC_Os08g31630	4501.64	1035.88	2.11944	1.99178e-05
LOC_Os03g64020	18306.7	4240	2.1102	2.0207e-05
LOC_Os05g08770	108.631	16.958	2.66962	2.0288e-05
LOC_Os06g22960	3552.05	817.094	2.11989	2.10669e-05
LOC_Os06g05700	634.942	2776.36	-2.12831	2.10823e-05
LOC_Os12g36880	4802.87	20670.5	-2.10558	2.11965e-05
LOC_Os01g17240	5924.92	1371.65	2.11077	2.1206e-05
LOC_Os04g25800	51.5212	263.429	-2.35171	2.25713e-05
LOC_Os06g49190	67.1985	7.13483	3.21119	2.26193e-05
LOC_Os04g49757	6.72881	65.1806	-3.25468	2.26193e-05
LOC_Os11g28104	30.2448	172.342	-2.50619	2.27178e-05
LOC_Os10g27040	39.2033	211.634	-2.42924	2.27566e-05
LOC_Os03g45280	49195.5	11509.1	2.09574	2.30659e-05
LOC_Os01g32364	787.236	175.021	2.16838	2.30708e-05
LOC_Os04g39910	56.0004	283.968	-2.33995	2.30708e-05
LOC_Os03g50970	229.571	44.6414	2.3589	2.30708e-05
LOC_Os09g14800	1.12998	34.8183	-4.81228	2.30708e-05
LOC_Os12g28750	35.8439	1.77656	4.2345	2.30708e-05
LOC_Os03g45340	35.8439	0.883542	5.14362	2.30708e-05
LOC_Os04g55120	35.8439	0.883542	5.14362	2.30708e-05
LOC_Os01g48170	20.1665	128.584	-2.66602	2.31728e-05
LOC_Os04g45900	2783.86	642.958	2.11405	2.32361e-05
LOC_Os07g28480	703.25	3046.05	-2.11466	2.32881e-05
LOC_Os01g02530	5.60902	60.7156	-3.41032	2.34085e-05
LOC_Os03g42710	1399.77	318.795	2.134	2.34709e-05
LOC_Os11g40450	123.189	569.731	-2.20841	2.35693e-05
LOC_Os04g26330	38.0835	206.276	-2.43395	2.35759e-05
LOC_Os04g29680	2.24971	45.5344	-4.27198	2.36636e-05
LOC_Os03g09260	32.4844	180.379	-2.46921	2.36683e-05
novel.254	146.705	25.8882	2.49627	2.42528e-05
LOC_Os11g34600	3.36946	49.9995	-3.84709	2.42835e-05
novel.428	3.36946	49.9995	-3.84709	2.42835e-05
LOC_Os01g71114	26.8854	158.054	-2.55062	2.42835e-05
LOC_Os04g32010	10.0882	83.0408	-3.02721	2.43945e-05
LOC_Os05g38270	3282.17	762.621	2.10541	2.45887e-05
LOC_Os01g65010	489.367	105.366	2.21402	2.47731e-05
LOC_Os08g09690	629.343	138.407	2.1838	2.50009e-05
LOC_Os01g06500	284.442	58.0366	2.29037	2.51942e-05
LOC_Os08g02900	53.7608	268.787	-2.31949	2.54364e-05
LOC_Os12g38150	436.736	93.757	2.21809	2.54905e-05
LOC_Os12g37760	61.5995	303.614	-2.29921	2.55626e-05
LOC_Os02g46100	154.544	27.6742	2.47553	2.56559e-05
LOC_Os09g18594	5076.11	21534	-2.0848	2.57567e-05
LOC_Os11g47410	134.387	611.702	-2.18552	2.63064e-05
LOC_Os08g02700	24.6457	143.765	-2.53897	2.64494e-05
LOC_Os01g33470	1.38778e-17	27.6742	-7.80662	2.64494e-05
LOC_Os06g36560	29.125	1.38778e-17	7.87905	2.64494e-05
LOC_Os04g59200	1.38778e-17	27.6742	-7.80662	2.64494e-05
LOC_Os09g10054	38.0835	204.49	-2.42141	2.67516e-05
LOC_Os01g24790	12.3278	91.0779	-2.87398	2.8094e-05
LOC_Os07g31190	12.3278	91.0779	-2.87398	2.8094e-05
LOC_Os03g60560	40.3231	2.66963	3.85053	2.81225e-05
LOC_Os09g30462	40.3231	2.66963	3.85053	2.81225e-05
LOC_Os10g39640	83.9957	11.5999	2.84166	2.82974e-05
LOC_Os02g28460	30.2448	169.663	-2.4836	2.8327e-05
LOC_Os07g47420	311.317	64.2876	2.27331	2.85537e-05
LOC_Os02g02670	64.9589	317.009	-2.285	2.91568e-05
novel.465	118.71	19.6371	2.58741	2.92224e-05
novel.671	56.0004	5.34877	3.35554	2.96735e-05
LOC_Os08g13650	136.627	615.274	-2.1701	2.97384e-05
LOC_Os07g06850	58.2401	287.54	-2.30152	2.97384e-05
LOC_Os01g09120	730.126	164.305	2.15083	2.99264e-05
LOC_Os08g30540	45.9221	3.56269	3.63864	3.01636e-05
LOC_Os01g56740	45.9221	3.56269	3.63864	3.01636e-05
LOC_Os02g50340	16.8071	108.045	-2.6765	3.01661e-05
LOC_Os04g15550	1189.25	5014.24	-2.07588	3.0376e-05
LOC_Os09g02770	56.0004	277.717	-2.30786	3.04981e-05
LOC_Os08g09450	34.724	1.77656	4.18886	3.09619e-05
LOC_Os04g53300	34.724	0.883542	5.09798	3.09619e-05
LOC_Os06g47530	131.028	592.056	-2.17493	3.1092e-05
LOC_Os03g05350	44.8023	226.815	-2.33705	3.11343e-05
LOC_Os03g19930	711.089	160.733	2.1444	3.11343e-05
LOC_Os05g46240	126.548	21.4231	2.5548	3.11343e-05
LOC_Os04g15670	40.3231	209.848	-2.3765	3.13311e-05
LOC_Os02g02890	65084.4	15598.2	2.06092	3.19386e-05
LOC_Os05g51150	91.8343	13.386	2.7658	3.19959e-05
LOC_Os05g02050	91.8343	13.386	2.7658	3.19959e-05
LOC_Os06g09610	9498.23	2271.81	2.06375	3.22996e-05
LOC_Os05g48930	412.1	89.2919	2.20464	3.31425e-05
LOC_Os08g16570	3825.28	912.646	2.06727	3.35145e-05
LOC_Os04g29550	2599.09	615.274	2.07845	3.35145e-05
LOC_Os12g16540	67.1985	322.367	-2.26035	3.35145e-05
LOC_Os12g12370	623.744	141.086	2.14328	3.35145e-05
LOC_Os10g33440	26.8854	154.482	-2.51767	3.3759e-05
LOC_Os01g09150	26.8854	154.482	-2.51767	3.3759e-05
LOC_Os02g27490	3706.58	884.07	2.06768	3.4234e-05
LOC_Os02g05950	20.1665	124.119	-2.61509	3.45e-05
LOC_Os05g05630	44.8023	225.029	-2.32565	3.50443e-05
LOC_Os10g12470	39.2033	204.49	-2.37973	3.51722e-05
LOC_Os02g20640	8.96841	75.8968	-3.06538	3.56078e-05
LOC_Os02g17400	8.96841	76.7898	-3.08223	3.56078e-05
LOC_Os12g11980	7.84861	66.9667	-3.07495	3.56903e-05
LOC_Os05g06660	78.3966	366.125	-2.2219	3.59611e-05
LOC_Os02g52490	39.2033	2.66963	3.81001	3.6766e-05
LOC_Os08g38080	39.2033	2.66963	3.81001	3.6766e-05
LOC_Os02g08100	1246.36	5180.34	-2.05523	3.69066e-05
LOC_Os07g03050	77.2768	361.66	-2.22493	3.71396e-05
LOC_Os08g13870	19.0467	118.761	-2.63344	3.72406e-05
LOC_Os01g66180	367.307	79.4688	2.20656	3.72549e-05
LOC_Os01g58240	351.63	1492.21	-2.08498	3.72549e-05
LOC_Os04g41620	1.38778e-17	26.7812	-7.75953	3.72549e-05
LOC_Os07g28010	1.38778e-17	26.7812	-7.75953	3.72549e-05
LOC_Os02g50090	1.38778e-17	26.7812	-7.75953	3.72549e-05
LOC_Os01g25340	1.38778e-17	26.7812	-7.75953	3.72549e-05
LOC_Os01g06200	1.38778e-17	26.7812	-7.75953	3.72549e-05
LOC_Os06g13690	28.0052	1.38778e-17	7.82271	3.72549e-05
LOC_Os08g44470	470.33	104.473	2.16905	3.75509e-05
LOC_Os01g26390	24.6457	140.193	-2.50271	3.76794e-05
LOC_Os01g34080	605.827	137.514	2.1382	3.76794e-05
LOC_Os11g34570	10.0882	80.3618	-2.97998	3.76794e-05
LOC_Os01g52120	81.7561	11.5999	2.80273	3.76794e-05
LOC_Os07g47940	3.36946	48.2135	-3.79475	3.76838e-05
LOC_Os04g40440	131.028	583.126	-2.15301	3.7956e-05
LOC_Os02g10490	13.4476	92.8639	-2.77763	3.80134e-05
LOC_Os02g30150	13.4476	92.8639	-2.77763	3.80134e-05
LOC_Os01g68470	13.4476	93.757	-2.79141	3.80134e-05
novel.234	36.9637	194.667	-2.39336	3.88111e-05
LOC_Os01g49560	32.4844	173.235	-2.41095	3.92988e-05
LOC_Os02g52390	8303.4	2015.51	2.04248	3.96065e-05
LOC_Os03g20900	1375.14	325.939	2.07643	3.9937e-05
LOC_Os04g52030	40.3231	206.276	-2.35175	4.00271e-05
LOC_Os02g42150	139.986	617.06	-2.13926	4.06888e-05
LOC_Os02g10290	116.47	517.936	-2.15177	4.12933e-05
LOC_Os11g01510	190.378	820.667	-2.1073	4.14136e-05
LOC_Os03g42720	33.6042	0.883542	5.05085	4.15378e-05
LOC_Os01g06580	33.6042	1.77656	4.14173	4.15378e-05
LOC_Os10g32550	715.568	166.091	2.10619	4.17854e-05
LOC_Os12g12090	465.851	1949.43	-2.06486	4.18022e-05
LOC_Os01g25360	25.7656	142.872	-2.46617	4.18198e-05
LOC_Os10g03900	20.1665	122.333	-2.5942	4.1881e-05
LOC_Os04g10924	2677.47	645.637	2.05184	4.1881e-05
LOC_Os09g19380	123.189	544.727	-2.14367	4.29825e-05
LOC_Os06g39900	697.651	2887.09	-2.04887	4.30978e-05
LOC_Os11g32320	5097.38	1242.17	2.03678	4.31545e-05
LOC_Os03g14040	3912.62	951.939	2.03904	4.32999e-05
LOC_Os03g60810	180.299	776.909	-2.10669	4.35556e-05
LOC_Os03g46325	4.48923	52.6785	-3.52007	4.46611e-05
LOC_Os03g51920	968.645	228.601	2.08246	4.46667e-05
LOC_Os01g02520	14.5675	96.436	-2.71754	4.49746e-05
LOC_Os08g14610	14.5675	96.436	-2.71754	4.49746e-05
LOC_Os03g27040	1666.29	400.952	2.05475	4.58291e-05
LOC_Os10g38060	90.7145	408.096	-2.16816	4.60054e-05
LOC_Os07g29240	661.817	153.589	2.10636	4.61597e-05
LOC_Os12g38550	62.7193	7.13483	3.11185	4.61597e-05
LOC_Os08g03400	152.304	28.5672	2.40889	4.69473e-05
LOC_Os02g21350	21.2863	125.012	-2.54788	4.7391e-05
LOC_Os04g38930	16.8071	104.473	-2.62805	4.77096e-05
LOC_Os07g39750	241.889	50.8925	2.24573	4.78271e-05
LOC_Os04g24650	1.12998	37.4973	-4.91883	4.78271e-05
LOC_Os10g27430	12.3278	87.5059	-2.81634	4.78313e-05
LOC_Os04g43670	8.96841	74.1107	-3.03108	4.82883e-05
LOC_Os03g15340	8.96841	74.1107	-3.03108	4.82883e-05
LOC_Os02g42740	134.387	24.9952	2.42023	4.8759e-05
LOC_Os12g26860	2.24971	41.9624	-4.15448	4.87739e-05
LOC_Os06g17980	2.24971	41.9624	-4.15448	4.87739e-05
LOC_Os06g43384	2.24971	42.8554	-4.18476	4.87739e-05
LOC_Os05g41640	50727.4	12551.2	2.01492	4.92589e-05
LOC_Os01g11230	6003.31	1479.71	2.02034	4.97881e-05
LOC_Os01g54890	378.506	84.8269	2.15589	5.01001e-05
LOC_Os03g27120	9563.18	2362.89	2.01687	5.01008e-05
LOC_Os02g16270	213.894	906.395	-2.08269	5.02376e-05
LOC_Os07g48500	18812.8	4657.03	2.0142	5.02376e-05
novel.738	58.2401	6.24181	3.19428	5.03963e-05
LOC_Os08g32110	52.641	250.927	-2.25064	5.07933e-05
LOC_Os02g36210	491.606	2019.98	-2.03852	5.14392e-05
LOC_Os08g17870	62.7193	291.112	-2.21263	5.21797e-05
LOC_Os11g03840	1.38778e-17	25.8882	-7.71085	5.25138e-05
LOC_Os11g34590	1.38778e-17	25.8882	-7.71085	5.25138e-05
LOC_Os04g07280	26.8854	1.38778e-17	7.76408	5.25138e-05
LOC_Os03g03740	1.38778e-17	25.8882	-7.71085	5.25138e-05
LOC_Os09g37880	1.38778e-17	25.8882	-7.71085	5.25138e-05
LOC_Os09g20510	1.38778e-17	25.8882	-7.71085	5.25138e-05
ChrSy.fgenesh.gene.44	1.38778e-17	25.8882	-7.71085	5.25138e-05
LOC_Os07g19160	26.8854	1.38778e-17	7.76408	5.25138e-05
LOC_Os08g01430	22.4061	128.584	-2.5149	5.26074e-05
LOC_Os06g08570	145.585	625.097	-2.10139	5.27098e-05
LOC_Os03g01300	474.809	1950.32	-2.03805	5.32291e-05
LOC_Os10g41470	1450.16	351.837	2.0428	5.32291e-05
LOC_Os12g09550	187.018	792.983	-2.08347	5.35132e-05
LOC_Os04g44670	108.631	18.7441	2.52623	5.4274e-05
LOC_Os01g43370	1771.55	432.207	2.03486	5.46258e-05
LOC_Os01g73160	145.585	27.6742	2.38945	5.47334e-05
LOC_Os04g55440	4.48923	50.8925	-3.47044	5.47423e-05
LOC_Os04g54020	216.133	907.288	-2.06909	5.55551e-05
LOC_Os03g62050	32.4844	0.883542	5.00212	5.60192e-05
LOC_Os03g02610	8.96841	73.2177	-3.01363	5.62235e-05
LOC_Os06g43980	20.1665	119.654	-2.56229	5.67836e-05
LOC_Os10g07004	62.7193	289.326	-2.20375	5.68005e-05
LOC_Os09g19930	34.724	175.914	-2.33722	5.72511e-05
LOC_Os07g49390	382.985	86.6129	2.14285	5.73834e-05
LOC_Os12g36590	181.419	36.6043	2.30491	5.73923e-05
novel.204	22.4061	127.691	-2.50486	5.79549e-05
LOC_Os01g36220	740.204	2995.14	-2.01647	5.79668e-05
LOC_Os10g35440	40.3231	200.025	-2.30738	5.81519e-05
LOC_Os07g29410	8562.07	2139.64	2.00052	5.83923e-05
LOC_Os03g53930	769.319	183.951	2.06343	5.93563e-05
LOC_Os05g25390	7.84861	64.2876	-3.01617	5.94036e-05
LOC_Os08g07774	1513.99	6058.17	-2.00045	6.02256e-05
LOC_Os07g42960	673.015	2720.1	-2.01477	6.02256e-05
LOC_Os03g26870	561.034	131.263	2.09446	6.02256e-05
LOC_Os12g36194	533.039	125.012	2.09094	6.03606e-05
LOC_Os09g26144	109.751	475.072	-2.11281	6.06335e-05
LOC_Os09g34180	107.512	18.7441	2.51129	6.06335e-05
LOC_Os08g29020	300.119	1235.02	-2.04054	6.06335e-05
LOC_Os11g39190	241.889	1004.63	-2.05375	6.08735e-05
LOC_Os06g21710	5.60902	55.3575	-3.27734	6.10511e-05
LOC_Os01g02700	273.243	1126.08	-2.04261	6.18236e-05
LOC_Os11g29790	66.0787	302.721	-2.19387	6.18236e-05
LOC_Os06g12370	516.242	120.547	2.09717	6.18236e-05
LOC_Os07g33620	503.924	117.868	2.09473	6.18236e-05
LOC_Os06g14620	228.451	48.2135	2.24112	6.18236e-05
LOC_Os05g49840	42.5627	3.56269	3.52933	6.18236e-05
LOC_Os04g10060	2.24971	41.0694	-4.12354	6.18236e-05
LOC_Os08g37840	42.5627	3.56269	3.52933	6.18236e-05
LOC_Os02g58440	153.424	649.209	-2.08038	6.18236e-05
LOC_Os11g09474	20.1665	117.868	-2.54062	6.2434e-05
LOC_Os01g04460	8.96841	68.7527	-2.92302	6.2434e-05
LOC_Os07g02460	792.835	191.095	2.05193	6.28806e-05
LOC_Os03g03660	610.306	2459.34	-2.01047	6.3273e-05
LOC_Os11g47400	282.202	1159.12	-2.03781	6.34614e-05
LOC_Os02g27110	890.258	3567.56	-2.00251	6.35535e-05
LOC_Os06g04380	315.796	70.5387	2.16031	6.40412e-05
LOC_Os03g08999	179.179	750.119	-2.06505	6.42976e-05
LOC_Os01g10400	499344	126193	1.9844	6.42976e-05
LOC_Os01g52490	521.841	122.333	2.09154	6.46676e-05
LOC_Os11g42800	14.5675	92.8639	-2.66317	6.47529e-05
LOC_Os05g31056	90.7145	397.38	-2.12978	6.4841e-05
LOC_Os06g44420	1020.16	249.141	2.03315	6.52874e-05
LOC_Os02g39930	1734.59	429.528	2.01342	6.55358e-05
LOC_Os01g72009	690.932	165.198	2.06343	6.62751e-05
LOC_Os06g47310	737.964	177.7	2.05325	6.6796e-05
LOC_Os11g40840	4.48923	49.9995	-3.44497	6.70947e-05
LOC_Os04g49490	4.48923	49.9995	-3.44497	6.70947e-05
LOC_Os03g16080	294.52	65.1806	2.17346	6.70947e-05
LOC_Os04g21790	10.0882	76.7898	-2.91449	6.75463e-05
LOC_Os01g26210	82.8759	367.911	-2.14887	6.76398e-05
LOC_Os08g38086	1166.85	286.647	2.02474	6.76398e-05
LOC_Os06g39230	57.1202	265.215	-2.21293	6.77509e-05
LOC_Os06g48180	263.165	57.1436	2.20057	6.78273e-05
novel.653	13618	3448.79	1.98131	6.78455e-05
LOC_Os02g01870	53.7608	249.141	-2.21004	6.81131e-05
LOC_Os04g01490	1173.57	288.433	2.02407	6.81623e-05
LOC_Os03g58100	89.5947	391.129	-2.12481	6.9202e-05
LOC_Os03g11819	11.208	80.3618	-2.82973	6.93167e-05
LOC_Os06g03830	42.5627	205.383	-2.26772	6.93378e-05
LOC_Os04g45520	126.548	23.2091	2.43996	6.93479e-05
LOC_Os08g10150	22.4061	125.012	-2.4743	6.93479e-05
LOC_Os06g30940	33.6042	168.77	-2.32458	7.00806e-05
LOC_Os04g38042	29.125	153.589	-2.39434	7.01454e-05
LOC_Os01g50370	262.045	58.0366	2.1721	7.11525e-05
LOC_Os01g71330	431.137	100.901	2.09368	7.23345e-05
LOC_Os09g10760	1442.32	358.981	2.006	7.33643e-05
LOC_Os06g12630	4325.83	1096.61	1.9798	7.33643e-05
LOC_Os07g42030	8.96841	66.9667	-2.88512	7.34701e-05
novel.329	5.60902	54.4645	-3.25394	7.35076e-05
LOC_Os04g42120	1.38778e-17	24.1021	-7.60826	7.35076e-05
LOC_Os01g66544	1.38778e-17	24.9952	-7.66047	7.35076e-05
LOC_Os06g33170	25.7656	1.38778e-17	7.70297	7.35076e-05
LOC_Os02g38450	25.7656	1.38778e-17	7.70297	7.35076e-05
novel.491	1.38778e-17	24.9952	-7.66047	7.35076e-05
LOC_Os12g03640	1.38778e-17	24.9952	-7.66047	7.35076e-05
LOC_Os02g28180	25.7656	1.38778e-17	7.70297	7.35076e-05
LOC_Os02g46780	1.38778e-17	24.9952	-7.66047	7.35076e-05
LOC_Os06g38510	1.38778e-17	24.1021	-7.60826	7.35076e-05
LOC_Os11g29690	97.4334	16.958	2.51284	7.37079e-05
LOC_Os03g51930	4970.84	1262.71	1.97685	7.39377e-05
LOC_Os03g55590	3914.86	993.017	1.97892	7.40863e-05
LOC_Os02g06810	16.8071	100.008	-2.56512	7.43223e-05
LOC_Os10g39170	31.3646	0.883542	4.95169	7.46639e-05
LOC_Os10g31320	409.86	95.543	2.0993	7.48819e-05
LOC_Os01g16620	17.9269	108.045	-2.58405	7.52452e-05
LOC_Os03g26930	125.429	23.2091	2.42715	7.60954e-05
LOC_Os05g48310	534.159	127.691	2.06341	7.75972e-05
LOC_Os06g02420	1297.87	324.153	2.00093	7.82355e-05
LOC_Os04g14200	68.3183	305.4	-2.15857	7.82739e-05
LOC_Os04g57850	54.8806	254.499	-2.21104	7.84386e-05
LOC_Os08g06100	4530.76	17684.3	-1.96462	7.84386e-05
LOC_Os03g57425	2.24971	40.1764	-4.09193	7.84687e-05
LOC_Os05g22730	5910.36	1510.96	1.96768	7.94727e-05
LOC_Os05g51830	867.862	213.42	2.02306	7.94727e-05
LOC_Os08g33660	11.208	79.4688	-2.81364	7.95771e-05
LOC_Os03g31180	144.465	600.986	-2.05579	7.95932e-05
LOC_Os07g17250	131.028	550.085	-2.06887	8.02839e-05
LOC_Os08g30340	36.9637	2.66963	3.7254	8.05963e-05
novel.696	36.9637	2.66963	3.7254	8.05963e-05
LOC_Os01g62584	31.3646	158.947	-2.3373	8.14336e-05
LOC_Os03g57420	597.988	144.659	2.04641	8.15262e-05
LOC_Os06g43120	715.568	2818.33	-1.97752	8.15873e-05
LOC_Os09g09040	156.783	31.2462	2.32193	8.16209e-05
LOC_Os07g06450	2721.15	692.073	1.975	8.23387e-05
LOC_Os03g03610	1865.61	7271.77	-1.96259	8.26422e-05
LOC_Os01g19170	903.696	223.243	2.01654	8.26835e-05
LOC_Os03g19120	203.815	43.7484	2.21638	8.26835e-05
LOC_Os05g38290	63.8391	8.92088	2.82035	8.26835e-05
LOC_Os11g29720	5072.75	1300.21	1.9639	8.28098e-05
LOC_Os02g04230	428.897	1703.85	-1.98983	8.33895e-05
LOC_Os02g21920	195.977	41.9624	2.21978	8.33895e-05
LOC_Os12g32790	107.512	455.426	-2.08161	8.33895e-05
LOC_Os03g22634	14936	57925.9	-1.95541	8.33973e-05
LOC_Os01g38530	21.2863	119.654	-2.48475	8.34837e-05
novel.451	21.2863	119.654	-2.48475	8.34837e-05
LOC_Os03g17730	1076.15	268.787	2.00078	8.52486e-05
LOC_Os06g38780	56.0004	256.285	-2.19205	8.57533e-05
LOC_Os01g58450	8.96841	66.0737	-2.86579	8.58209e-05
LOC_Os01g44210	15551.9	4014.96	1.9536	8.63502e-05
LOC_Os07g37420	6864.44	1768.15	1.95682	8.64978e-05
LOC_Os10g36270	171.341	701.003	-2.03187	8.72574e-05
LOC_Os01g02740	31.3646	158.054	-2.32917	8.7594e-05
LOC_Os02g48820	155.663	31.2462	2.31159	8.81099e-05
LOC_Os03g61220	6259.74	1614.55	1.95488	8.85779e-05
LOC_Os04g53370	194.857	41.9624	2.21152	8.89309e-05
LOC_Os11g37970	5.60902	53.5715	-3.23014	8.90222e-05
novel.560	5.60902	53.5715	-3.23014	8.90222e-05
LOC_Os01g05780	10.0882	74.1107	-2.86335	9.01946e-05
LOC_Os01g15448	135.507	26.7812	2.33313	9.06457e-05
LOC_Os11g45130	45.9221	216.099	-2.23174	9.07682e-05
LOC_Os04g51300	3688.66	950.153	1.95671	9.07682e-05
LOC_Os02g14840	434.496	1711.89	-1.97791	9.07682e-05
LOC_Os03g05210	174.7	36.6043	2.2505	9.1883e-05
LOC_Os05g49130	115.35	21.4231	2.42126	9.28968e-05
LOC_Os04g48460	115.35	482.216	-2.06263	9.28968e-05
LOC_Os12g36680	213.894	863.531	-2.01281	9.28968e-05
LOC_Os03g47960	19.0467	110.724	-2.53246	9.31015e-05
LOC_Os01g49720	104.152	18.7441	2.46554	9.35261e-05
LOC_Os05g50850	249.727	997.482	-1.99747	9.35261e-05
LOC_Os04g58050	96.3136	16.065	2.5736	9.35261e-05
LOC_Os06g14350	490.486	118.761	2.04487	9.451e-05
novel.137	58.2401	261.643	-2.16542	9.82301e-05
LOC_Os04g49748	169.101	686.715	-2.02113	9.83474e-05
LOC_Os09g32095	62.7193	8.92088	2.79486	9.87409e-05
LOC_Os01g56460	62.7193	8.92088	2.79486	9.87409e-05
LOC_Os10g04180	57.1202	257.178	-2.16856	9.87599e-05
LOC_Os06g34120	131.028	25.8882	2.33335	0.000100169
LOC_Os04g49370	48.1618	222.35	-2.20432	0.000100542
LOC_Os02g43820	1.12998	29.4602	-4.57221	0.000101581
LOC_Os01g41920	1.12998	29.4602	-4.57221	0.000101581
LOC_Os07g37690	4.48923	48.2135	-3.39263	0.000101581
LOC_Os01g09990	4.48923	48.2135	-3.39263	0.000101581
LOC_Os06g45040	1394.17	355.409	1.97144	0.000101581
LOC_Os03g58290	1554.31	5967.97	-1.9409	0.000101672
LOC_Os02g39870	770.439	192.881	1.99719	0.000101963
LOC_Os03g58040	683.094	169.663	2.00852	0.000102161
LOC_Os01g07260	81.7561	348.265	-2.08932	0.000103451
LOC_Os01g02750	998.88	252.713	1.98222	0.000103525
LOC_Os02g36110	8.96841	69.6457	-2.9416	0.000103525
LOC_Os01g47110	17.9269	105.366	-2.54787	0.000104455
LOC_Os05g23050	24.6457	1.38778e-17	7.63916	0.000104568
LOC_Os08g02390	468.09	113.403	2.04398	0.00010485
LOC_Os06g12600	2771.54	718.863	1.94669	0.000105575
LOC_Os10g32400	35.8439	2.66963	3.68115	0.000105838
LOC_Os06g05284	15.6873	92.8639	-2.55712	0.000105938
LOC_Os05g05310	45.9221	213.42	-2.21375	0.000108187
LOC_Os06g50130	1862.25	480.43	1.95434	0.000108529
LOC_Os04g45000	2228.43	8495.19	-1.93057	0.000109415
LOC_Os10g34440	38.0835	182.165	-2.25474	0.000110265
LOC_Os01g59980	583.431	144.659	2.01086	0.000110461
LOC_Os03g01580	23.5259	124.119	-2.39396	0.000110943
LOC_Os12g17880	60.4797	266.108	-2.13549	0.00011129
LOC_Os12g01490	36.9637	178.593	-2.26912	0.000111331
LOC_Os08g10080	426.657	1655.63	-1.95596	0.00011156
LOC_Os02g40040	958.567	243.783	1.97467	0.000111761
LOC_Os08g37040	1082.87	276.824	1.96727	0.000113472
LOC_Os09g26920	114.231	21.4231	2.4072	0.000114605
LOC_Os06g10650	144.465	584.019	-2.01448	0.000114948
LOC_Os01g32640	3.36946	43.7484	-3.65495	0.000115563
LOC_Os02g35170	2752.5	718.863	1.93675	0.000115694
LOC_Os01g37950	1481.52	383.092	1.95092	0.000115996
LOC_Os03g03520	206.055	45.5344	2.17458	0.000117291
LOC_Os03g18170	1185.89	304.507	1.96093	0.000117366
LOC_Os03g09230	296.759	69.6457	2.08899	0.000118763
LOC_Os01g68960	133.267	26.7812	2.3091	0.000119041
LOC_Os07g25430	22979.6	6084.96	1.91701	0.000119683
LOC_Os11g29970	166.862	668.855	-2.00234	0.000119683
LOC_Os01g09430	2083.98	543.834	1.93783	0.000121163
LOC_Os01g26280	61.5995	267.894	-2.11872	0.000121186
LOC_Os05g02200	470.33	115.189	2.02835	0.000122562
LOC_Os04g40630	77.2768	12.493	2.61573	0.000122853
LOC_Os03g46330	67.1985	290.219	-2.10885	0.000125386
LOC_Os09g34140	1596.86	416.133	1.93976	0.000126022
LOC_Os08g31200	173.58	689.394	-1.98905	0.000126049
LOC_Os03g39610	169064	44992.5	1.90981	0.000126199
LOC_Os06g23180	4.48923	47.3204	-3.36574	0.000126456
LOC_Os05g48220	514.002	127.691	2.00793	0.000126456
LOC_Os01g43160	139.986	28.5672	2.28731	0.000126576
LOC_Os08g02990	166.862	666.176	-1.99655	0.000126776
LOC_Os04g41860	52.641	233.066	-2.14418	0.000126776
LOC_Os05g08420	301.239	1168.94	-1.95584	0.000127394
LOC_Os06g05050	247.488	966.227	-1.96454	0.000127752
LOC_Os03g44620	1098.54	4152.48	-1.91828	0.000128755
LOC_Os11g16580	3314.65	875.14	1.9211	0.000129038
novel.344	334.833	1294.85	-1.95093	0.00012942
LOC_Os01g57004	310.197	74.1107	2.06337	0.00012942
LOC_Os01g71624	449.054	110.724	2.01855	0.000129871
LOC_Os03g56840	463.611	114.296	2.01881	0.000129872
LOC_Os01g10800	24.6457	125.905	-2.34778	0.000132373
LOC_Os03g42130	8275.4	2204.83	1.90809	0.000133559
LOC_Os06g13090	43.6825	198.239	-2.17931	0.000134222
LOC_Os04g09840	23.5259	122.333	-2.37307	0.00013455
LOC_Os06g15700	482.648	1839.59	-1.9301	0.00013647
LOC_Os01g68740	133.267	534.904	-2.00408	0.000136897
LOC_Os04g30410	14.5675	87.5059	-2.57755	0.000138304
LOC_Os09g32180	6.72881	55.3575	-3.01953	0.000138655
LOC_Os02g38494	29.125	1.77656	3.93609	0.000139116
LOC_Os08g43210	29.125	0.883542	4.84521	0.000139116
LOC_Os10g40520	34.724	2.66963	3.63551	0.000140649
LOC_Os03g25510	34.724	2.66963	3.63551	0.000140649
LOC_Os01g72490	202.695	45.5344	2.15088	0.000140738
LOC_Os07g09340	2262.02	8457.68	-1.9026	0.00014095
LOC_Os08g02110	80.6363	13.386	2.57845	0.000141052
LOC_Os01g22900	959.687	3604.18	-1.90892	0.000142223
LOC_Os08g03002	8.96841	63.3946	-2.8062	0.000142871
LOC_Os03g31490	7022.33	1880.67	1.90063	0.000144026
LOC_Os01g73450	4625.94	1236.81	1.903	0.00014487
LOC_Os08g01940	398.662	1518.11	-1.92875	0.000145004
LOC_Os03g17310	544.237	2060.16	-1.92024	0.000145656
LOC_Os02g20190	3.36946	42.8554	-3.62529	0.000146151
LOC_Os06g45410	43.6825	4.45574	3.25449	0.000146151
LOC_Os11g35310	17.9269	102.687	-2.51076	0.00014641
LOC_Os03g48040	2068.3	547.406	1.91749	0.000146768
LOC_Os04g42134	310.197	75.0038	2.04612	0.000151106
LOC_Os02g42180	1.38778e-17	22.3161	-7.49782	0.000151106
LOC_Os02g04540	23.5259	1.38778e-17	7.57239	0.000151106
novel.601	298.999	1145.72	-1.93766	0.000151646
LOC_Os02g18090	347.151	84.8269	2.03118	0.000152015
LOC_Os06g02580	576.712	146.445	1.97647	0.000152234
LOC_Os01g09190	192.617	749.226	-1.95907	0.000152732
LOC_Os05g08750	63.8391	274.145	-2.10055	0.000154382
LOC_Os06g14390	416.579	103.58	2.00639	0.000154615
LOC_Os04g15650	98.5532	400.059	-2.02005	0.00015546
LOC_Os06g29380	801.793	3003.18	-1.90505	0.000155772
LOC_Os05g46470	110.871	21.4231	2.36418	0.000157392
novel.613	87.3551	15.172	2.51474	0.000157392
LOC_Os04g57950	200.456	45.5344	2.13486	0.000159105
LOC_Os01g49890	1424.41	376.841	1.91794	0.000159502
LOC_Os01g62830	40.3231	183.951	-2.18661	0.000159887
LOC_Os06g11280	106.392	20.5301	2.36579	0.000160769
LOC_Os05g05140	9115.26	2464.7	1.88681	0.000161068
LOC_Os05g16430	57.1202	247.355	-2.1124	0.000161857
LOC_Os01g67550	234.05	54.4645	2.10061	0.0001633
LOC_Os11g17330	5.60902	49.9995	-3.13085	0.000163999
LOC_Os12g13660	5.60902	50.8925	-3.15632	0.000163999
LOC_Os08g05780	5.60902	50.8925	-3.15632	0.000163999
LOC_Os02g13350	2472.55	662.604	1.89956	0.000164729
LOC_Os04g49450	11.208	74.1107	-2.71311	0.000164857
LOC_Os12g33300	76.157	12.493	2.5947	0.000164857
LOC_Os03g56782	314.676	76.7898	2.03291	0.000166056
LOC_Os02g20280	48.1618	213.42	-2.14522	0.000167202
LOC_Os03g24910	6.72881	54.4645	-2.99613	0.000167725
LOC_Os09g38400	59.3599	8.02786	2.86539	0.00016953
novel.514	63.8391	9.8139	2.68464	0.000169599
novel.670	47.042	208.955	-2.14859	0.000170051
LOC_Os02g53620	91.8343	375.055	-2.02872	0.000170122
LOC_Os01g33110	159.023	621.525	-1.96585	0.000171508
LOC_Os04g26841	109.751	437.566	-1.9942	0.000173048
LOC_Os07g37240	116948	31895.6	1.87444	0.000173329
LOC_Os03g10030	487.127	1823.52	-1.90412	0.000173621
LOC_Os03g07220	92.9542	378.627	-2.02492	0.000174001
LOC_Os02g33030	202.695	46.4274	2.12294	0.000176338
LOC_Os02g13510	8455.69	30974	-1.87305	0.000177373
LOC_Os01g56980	142.226	557.229	-1.96927	0.000177777
LOC_Os06g48600	405.381	101.794	1.99214	0.000178042
LOC_Os09g20900	1199.33	318.795	1.91106	0.000178982
LOC_Os07g24190	370.667	1388.62	-1.90515	0.000184325
LOC_Os12g41830	116.47	23.2091	2.32035	0.000185248
LOC_Os12g35340	422.178	106.259	1.98885	0.000185845
LOC_Os07g43800	39.2033	178.593	-2.18451	0.000186649
novel.322	742.444	194.667	1.93051	0.000186854
LOC_Os02g34810	13736.7	3762.24	1.86833	0.000187857
LOC_Os01g02310	120.949	478.644	-1.98359	0.000187985
LOC_Os05g48200	25.7656	125.905	-2.28397	0.000188746
LOC_Os01g23970	35.8439	163.412	-2.1853	0.000189684
LOC_Os01g15320	113.111	22.3161	2.33444	0.000189891
LOC_Os10g04510	38.0835	174.128	-2.18969	0.000190418
LOC_Os08g11470	761.48	2807.61	-1.88232	0.000190842
LOC_Os01g38359	582.311	2154.82	-1.88751	0.000191144
LOC_Os09g37430	1.12998	27.6742	-4.4824	0.000191144
LOC_Os07g49090	1.12998	27.6742	-4.4824	0.000191144
LOC_Os12g32850	1.12998	27.6742	-4.4824	0.000191144
LOC_Os03g21310	75.0372	12.493	2.57336	0.00019127
LOC_Os01g10590	75.0372	12.493	2.57336	0.00019127
LOC_Os07g34260	94.074	17.8511	2.3888	0.000193667
LOC_Os03g03260	367.307	1369.87	-1.89867	0.000196277
LOC_Os04g55670	295.64	72.3247	2.02918	0.00019846
LOC_Os07g03000	384.105	1429.7	-1.89585	0.000199529
LOC_Os01g57480	359.469	1339.5	-1.89745	0.000200101
LOC_Os03g55720	17088.3	4706.15	1.86036	0.000200277
LOC_Os03g58320	105.272	20.5301	2.35054	0.000200333
LOC_Os02g31030	331.474	83.0408	1.99519	0.000201455
LOC_Os01g70525	5.60902	49.1065	-3.10492	0.000201629
LOC_Os06g15810	218.373	51.7855	2.07322	0.000202182
LOC_Os03g16030	58.2401	8.92088	2.68816	0.000203492
LOC_Os01g48300	1606.94	434.887	1.88526	0.000203492
LOC_Os11g40009	54.8806	7.13483	2.91961	0.000203541
LOC_Os12g16290	155.663	598.307	-1.94172	0.000203927
LOC_Os12g16490	79.5164	322.367	-2.01791	0.000206932
LOC_Os07g03030	390.823	1451.13	-1.8923	0.000206932
LOC_Os04g11820	43.6825	191.095	-2.1264	0.000207423
LOC_Os01g63690	34.724	158.054	-2.18288	0.00020859
LOC_Os07g01214	554.316	2039.62	-1.87932	0.000208637
LOC_Os03g48030	424.418	108.938	1.9606	0.000210083
LOC_Os01g46570	998.88	267.894	1.8981	0.000212159
LOC_Os08g02540	2020.15	550.978	1.87413	0.000212705
LOC_Os11g34940	810.752	216.099	1.90688	0.000212873
LOC_Os03g38950	3220.58	884.07	1.86492	0.000212902
LOC_Os04g15690	808.512	2950.49	-1.86748	0.000214939
novel.188	44.8023	193.774	-2.11005	0.000215984
LOC_Os04g30110	41.4429	183.058	-2.14018	0.000217112
LOC_Os03g46400	2.24971	36.6043	-3.95806	0.00021747
ChrSy.fgenesh.gene.14	82.8759	334.869	-2.01316	0.000218009
LOC_Os12g32390	22.4061	1.38778e-17	7.50238	0.000218009
novel.61	22.4061	1.38778e-17	7.50238	0.000218009
LOC_Os08g10290	1.38778e-17	21.4231	-7.43926	0.000218009
LOC_Os09g02300	22.4061	1.38778e-17	7.50238	0.000218009
LOC_Os06g42780	22.4061	1.38778e-17	7.50238	0.000218009
LOC_Os02g12470	22.4061	1.38778e-17	7.50238	0.000218009
LOC_Os09g29600	120.949	472.393	-1.96463	0.000218646
LOC_Os08g42850	2363.93	647.423	1.86818	0.000218646
LOC_Os02g31924	26.8854	128.584	-2.2532	0.000218918
LOC_Os02g38820	5247.44	1451.13	1.85433	0.000219904
LOC_Os11g46810	227.331	852.815	-1.90694	0.000221296
LOC_Os11g05800	11.208	72.3247	-2.67798	0.00022141
LOC_Os04g16740	36.9637	167.877	-2.17991	0.000222556
LOC_Os03g59180	228.451	856.387	-1.90588	0.000223119
LOC_Os04g12830	31.3646	146.445	-2.21921	0.000224838
LOC_Os07g19120	188.138	43.7484	2.10098	0.000225044
LOC_Os07g28610	11537.4	3206.79	1.84707	0.000226069
LOC_Os01g53390	129.908	503.648	-1.95404	0.000226236
LOC_Os04g53120	396.422	1458.28	-1.87887	0.000226436
LOC_Os01g51632	75.0372	305.4	-2.02346	0.000227188
LOC_Os04g49900	14.5675	83.0408	-2.50211	0.00023271
LOC_Os06g21720	14.5675	83.0408	-2.50211	0.00023271
LOC_Os08g34790	173.58	656.353	-1.91821	0.000233072
LOC_Os06g20320	2061.58	567.052	1.86194	0.000233073
LOC_Os01g57082	146.705	559.015	-1.92919	0.000234067
LOC_Os01g15250	3.36946	40.1764	-3.53246	0.000234099
LOC_Os11g15340	3.36946	40.1764	-3.53246	0.000234099
LOC_Os03g09170	41.4429	4.45574	3.17877	0.000234099
LOC_Os10g31864	35.8439	159.84	-2.15344	0.000234121
LOC_Os02g10950	281.082	69.6457	2.01071	0.000234732
LOC_Os01g27730	367.307	93.757	1.96839	0.000236324
LOC_Os02g54640	244.128	909.074	-1.89629	0.000237
LOC_Os04g47912	36.9637	166.984	-2.17223	0.000238389
LOC_Os03g22340	1070.55	291.112	1.8782	0.000239785
LOC_Os07g41190	80.6363	14.279	2.48616	0.000239836
LOC_Os04g09604	47.042	203.597	-2.11114	0.000239836
LOC_Os05g38530	5616.97	1566.33	1.84231	0.000242942
LOC_Os06g43370	6.72881	52.6785	-2.94815	0.000246157
LOC_Os05g16980	16.8071	90.1849	-2.41617	0.000246157
LOC_Os07g39720	16.8071	90.1849	-2.41617	0.000246157
LOC_Os09g32640	1099.66	299.149	1.87763	0.000248867
LOC_Os01g06790	184.779	691.18	-1.90265	0.000252425
LOC_Os07g42740	35.8439	158.947	-2.14536	0.000252628
LOC_Os01g09750	272.124	67.8597	2.00141	0.000255407
LOC_Os04g49739	11.208	71.4317	-2.66009	0.000257956
LOC_Os01g04670	210.534	50.8925	2.04554	0.000257956
LOC_Os02g16280	17.9269	97.329	-2.43355	0.000258319
LOC_Os01g41810	958.567	3432.72	-1.84028	0.000261015
LOC_Os01g09590	45.9221	198.239	-2.10736	0.000261963
LOC_Os10g02840	28.0052	0.883542	4.78887	0.000263463
LOC_Os02g55560	282.202	70.5387	1.9981	0.000263545
LOC_Os07g38390	207.175	49.1065	2.07375	0.000264279
LOC_Os08g10580	107.512	415.24	-1.94838	0.000265043
LOC_Os06g41980	43.6825	187.523	-2.0992	0.00026601
LOC_Os01g66760	10.0882	66.9667	-2.71739	0.000266712
novel.69	1783.87	494.718	1.85003	0.000268988
LOC_Os08g39820	209.414	50.8925	2.03785	0.000273501
LOC_Os08g23210	30.2448	140.193	-2.20859	0.000273501
LOC_Os01g18210	908.175	247.355	1.8758	0.000273611
LOC_Os07g48596	589.03	158.054	1.89699	0.000276807
LOC_Os04g29950	13.4476	78.5758	-2.53697	0.000276949
LOC_Os07g40040	148.945	33.9253	2.12979	0.0002776
LOC_Os04g12530	120.949	463.463	-1.9371	0.000277673
LOC_Os08g42840	63.8391	261.643	-2.03324	0.000278309
LOC_Os03g16470	584.55	156.268	1.90236	0.000279099
LOC_Os04g10940	2721.15	761.728	1.83668	0.000279692
LOC_Os12g03080	146.705	550.978	-1.9083	0.00028011
LOC_Os06g03560	1999.99	557.229	1.84339	0.000281023
LOC_Os02g28810	1032.47	283.968	1.86179	0.000281023
LOC_Os04g12060	59.3599	242.89	-2.03076	0.00028114
LOC_Os07g02660	2.24971	35.7113	-3.92256	0.000281349
LOC_Os01g22980	2338.17	653.674	1.83851	0.000281706
LOC_Os06g13580	188.138	44.6414	2.07191	0.000282844
LOC_Os04g38850	604.707	162.519	1.89472	0.000285583
LOC_Os01g03680	144.465	33.0323	2.12411	0.000286143
LOC_Os01g09510	1038.07	285.754	1.86055	0.000287917
LOC_Os06g28950	2949.59	828.704	1.83141	0.000288254
LOC_Os11g41370	15.6873	85.7199	-2.44181	0.000290838
LOC_Os05g35010	81.7561	320.581	-1.96988	0.00029179
LOC_Os01g41650	101.913	393.808	-1.94903	0.000292524
LOC_Os01g43230	111.991	429.528	-1.93835	0.000294722
LOC_Os03g63850	36.9637	164.305	-2.14891	0.000295531
LOC_Os06g27560	375.146	1352.9	-1.85023	0.000297651
LOC_Os02g08170	40.3231	4.45574	3.13936	0.000298463
LOC_Os06g42020	3.36946	39.2833	-3.50014	0.000298463
LOC_Os07g18990	339.312	87.5059	1.95345	0.000298463
LOC_Os06g10520	150.064	562.587	-1.90574	0.000299304
LOC_Os02g32860	147.825	33.9253	2.11891	0.000299304
LOC_Os05g16420	6.72881	51.7855	-2.92354	0.000299304
LOC_Os02g42160	313.557	1134.11	-1.85441	0.000300865
LOC_Os04g33310	505.044	1807.44	-1.83925	0.000302591
LOC_Os04g43650	1128.78	3985.49	-1.8199	0.000306068
LOC_Os02g04050	305.718	1103.75	-1.85178	0.000307889
LOC_Os10g24100	59.3599	241.104	-2.02012	0.000310474
LOC_Os06g41640	33.6042	149.124	-2.14618	0.00031346
LOC_Os03g55180	92.9542	359.874	-1.95166	0.00031627
LOC_Os03g60110	148.945	556.336	-1.90042	0.000316862
LOC_Os05g20460	13.4476	77.6828	-2.52051	0.000316862
novel.477	21.2863	1.38778e-17	7.4288	0.000316862
LOC_Os07g11420	1.38778e-17	20.5301	-7.37822	0.000316862
LOC_Os06g17090	1.38778e-17	20.5301	-7.37822	0.000316862
LOC_Os10g21640	1.38778e-17	20.5301	-7.37822	0.000316862
LOC_Os04g18650	21.2863	1.38778e-17	7.4288	0.000316862
LOC_Os02g54790	21.2863	1.38778e-17	7.4288	0.000316862
ChrSy.fgenesh.gene.28	21.2863	1.38778e-17	7.4288	0.000316862
LOC_Os01g56080	41.4429	177.7	-2.09735	0.000319666
LOC_Os05g50500	1632.69	458.998	1.83038	0.000320487
LOC_Os11g47960	2627.08	743.868	1.82015	0.000322069
LOC_Os01g72100	3360.56	955.511	1.8142	0.0003227
LOC_Os08g42910	250.847	909.967	-1.85856	0.000328429
LOC_Os08g10244	1249.72	4383.77	-1.81048	0.000329088
LOC_Os02g52290	7171.27	2051.23	1.80567	0.000330142
LOC_Os08g35420	174.7	41.9624	2.05408	0.000330142
LOC_Os01g04470	15.6873	83.9339	-2.41148	0.000330246
LOC_Os02g42690	44.8023	187.523	-2.06277	0.000331618
LOC_Os02g54710	202.695	49.1065	2.04223	0.000332613
LOC_Os08g09190	116.47	438.459	-1.9115	0.00033923
LOC_Os03g04470	3639.39	1039.45	1.80773	0.000339321
LOC_Os07g06800	6325.81	1812.8	1.80295	0.000340238
LOC_Os01g47080	64.9589	259.857	-1.99832	0.000341857
LOC_Os11g02620	94.074	360.767	-1.93798	0.000343131
LOC_Os04g45370	2461.35	700.11	1.81359	0.000343403
LOC_Os03g54160	758.121	2667.41	-1.81479	0.000343829
LOC_Os07g44330	15222.7	52867	-1.79614	0.000344676
LOC_Os08g25380	26.8854	123.226	-2.19186	0.000344976
LOC_Os03g49600	1296.75	364.339	1.83115	0.000345247
LOC_Os08g21561	156.783	575.982	-1.87653	0.000347388
novel.92	19.0467	98.222	-2.35983	0.000347388
LOC_Os02g37770	11.208	69.6457	-2.62362	0.000347781
LOC_Os02g36070	11.208	69.6457	-2.62362	0.000347781
LOC_Os09g39500	667.416	183.951	1.85847	0.000348716
LOC_Os07g03990	7.84861	54.4645	-2.77748	0.000351047
LOC_Os02g30300	56.0004	8.92088	2.6317	0.000351047
LOC_Os10g31780	7.84861	54.4645	-2.77748	0.000351047
LOC_Os07g46800	56.0004	8.92088	2.6317	0.000351047
LOC_Os09g25710	56.0004	8.02786	2.78151	0.000351047
LOC_Os07g12250	708.849	195.56	1.85712	0.000351959
LOC_Os07g26740	282.202	72.3247	1.9621	0.000354263
LOC_Os05g41110	1324.74	373.269	1.82704	0.000354786
LOC_Os12g06410	86.2353	332.19	-1.94433	0.000355809
LOC_Os01g43100	246.368	62.5016	1.97645	0.000357618
LOC_Os04g02030	25.7656	119.654	-2.21058	0.000358855
LOC_Os03g62200	1082.87	3772.06	-1.8004	0.000362475
LOC_Os06g20870	29.125	133.049	-2.18743	0.000362529
LOC_Os09g11490	1.12998	25.8882	-4.38663	0.000362793
LOC_Os05g32960	26.8854	1.77656	3.82113	0.000362793
LOC_Os06g09560	77.2768	14.279	2.42486	0.000362793
novel.457	142.226	33.0323	2.10158	0.000362793
LOC_Os04g12090	148.945	34.8183	2.09245	0.000363153
LOC_Os11g40600	5286.63	1522.57	1.79574	0.000363153
LOC_Os03g03080	10.0882	65.1806	-2.67847	0.000363565
LOC_Os12g21580	2.24971	34.8183	-3.88616	0.000363768
LOC_Os03g51230	35.8439	3.56269	3.28219	0.000363768
LOC_Os05g40384	20.1665	101.794	-2.32936	0.000367772
LOC_Os11g29130	103.032	21.4231	2.25851	0.000367772
LOC_Os04g48160	933.931	261.643	1.83516	0.00036853
LOC_Os01g65992	5.60902	46.4274	-3.02421	0.00037279
LOC_Os08g30780	5.60902	46.4274	-3.02421	0.00037279
LOC_Os08g44040	5.60902	46.4274	-3.02421	0.00037279
LOC_Os11g03780	15.6873	83.0408	-2.39607	0.000373281
LOC_Os01g51530	3651.71	1051.96	1.79536	0.000373763
LOC_Os02g12320	73.9174	289.326	-1.96715	0.000373763
LOC_Os07g25390	189.258	686.715	-1.85877	0.000373763
LOC_Os12g39420	165.742	602.772	-1.862	0.000375418
novel.160	82.8759	320.581	-1.95028	0.000375418
LOC_Os11g06980	34.724	150.017	-2.10766	0.000376068
LOC_Os02g07690	90.7145	343.8	-1.92091	0.000377685
LOC_Os01g56290	307.958	80.3618	1.93629	0.000377685
LOC_Os09g32250	43.6825	5.34877	2.99798	0.000377906
LOC_Os03g48300	1642.77	5683.99	-1.79071	0.000378377
LOC_Os12g13550	17.9269	90.1849	-2.32372	0.000379882
LOC_Os01g34890	12.3278	72.3247	-2.54191	0.000379975
LOC_Os05g24520	12.3278	72.3247	-2.54191	0.000379975
LOC_Os03g20460	324.755	85.7199	1.91992	0.000380832
LOC_Os11g16530	154.544	564.373	-1.86791	0.000383157
LOC_Os02g49470	1608.06	458.998	1.80844	0.000383804
LOC_Os07g49460	5132.1	1485.96	1.78806	0.000386625
LOC_Os02g33450	14065.9	4087.29	1.78295	0.000388098
LOC_Os06g40240	251.967	64.2876	1.96829	0.000389181
LOC_Os10g42190	279.962	996.589	-1.83137	0.000390329
LOC_Os09g28510	4615.86	1336.83	1.78768	0.000390329
LOC_Os06g01760	2236.27	642.958	1.79807	0.00039393
LOC_Os11g44940	622.624	172.342	1.85224	0.000394648
LOC_Os12g43340	7845.39	2279.84	1.78285	0.000395386
LOC_Os12g15505	935.051	263.429	1.82708	0.000396258
LOC_Os12g04204	795.075	2760.28	-1.79552	0.000397875
LOC_Os01g08370	71.6778	277.717	-1.95241	0.000399061
LOC_Os11g08850	8.96841	57.1436	-2.65676	0.000399061
LOC_Os06g27360	8.96841	57.1436	-2.65676	0.000399061
LOC_Os01g44069	8.96841	57.1436	-2.65676	0.000399061
LOC_Os12g07880	87.3551	17.8511	2.28203	0.000399417
LOC_Os01g52594	202.695	50.8925	1.99083	0.000402116
LOC_Os03g01910	2133.25	614.381	1.79561	0.000409868
LOC_Os04g47140	108.631	23.2091	2.21993	0.000409868
LOC_Os09g31482	10384	3031.76	1.77609	0.000415212
LOC_Os04g10530	48.1618	197.346	-2.03232	0.00041638
LOC_Os12g41930	367.307	98.222	1.90136	0.000418526
LOC_Os06g08320	1052.63	300.042	1.81028	0.000423326
LOC_Os09g09830	510.643	1774.4	-1.79673	0.000424275
LOC_Os05g34150	66.0787	11.5999	2.49607	0.000425187
LOC_Os04g31760	10.0882	64.2876	-2.65861	0.000425187
LOC_Os02g18830	567.753	157.161	1.85209	0.000425451
LOC_Os04g09540	17.9269	89.2919	-2.30939	0.000428937
LOC_Os02g48710	454.653	124.119	1.87185	0.000429252
LOC_Os01g42330	47.042	193.774	-2.03985	0.000430266
LOC_Os07g33660	1306.83	374.162	1.80395	0.000430266
LOC_Os04g38880	19.0467	96.436	-2.33339	0.000430906
LOC_Os01g72330	1225.08	350.944	1.80315	0.000430916
LOC_Os08g28030	111.991	24.9952	2.15746	0.00043108
LOC_Os02g22070	651.739	183.058	1.8312	0.000435746
LOC_Os01g36090	253.087	65.1806	1.95482	0.000436151
LOC_Os03g62060	30.2448	2.66963	3.43696	0.000439142
LOC_Os04g32370	369.547	1289.5	-1.80268	0.000439789
LOC_Os06g47560	12.3278	71.4317	-2.52402	0.000439789
LOC_Os02g37690	1247.48	4270.36	-1.77526	0.000439801
LOC_Os05g50800	166.862	40.1764	2.05044	0.000444101
LOC_Os03g61560	215.013	54.4645	1.97828	0.000444101
LOC_Os03g58110	45.9221	189.309	-2.04091	0.000444643
LOC_Os04g50990	739.084	208.955	1.82185	0.000446399
LOC_Os07g31250	36.9637	158.054	-2.093	0.000447559
LOC_Os02g01490	369.547	1287.71	-1.80068	0.000447559
LOC_Os11g43620	79.5164	15.172	2.37929	0.000448224
LOC_Os05g12400	1182.53	339.335	1.80067	0.000450964
LOC_Os05g07880	141.106	512.578	-1.8602	0.000453226
LOC_Os01g14050	116.47	427.742	-1.87582	0.000454087
LOC_Os05g27100	1771.55	513.471	1.78637	0.000455511
LOC_Os02g36780	5.60902	45.5344	-2.99627	0.000458361
LOC_Os01g34450	20.1665	1.38778e-17	7.35126	0.000458578
LOC_Os04g02590	1.38778e-17	19.6371	-7.31449	0.000458578
LOC_Os06g39780	1.38778e-17	19.6371	-7.31449	0.000458578
LOC_Os08g13610	1.38778e-17	19.6371	-7.31449	0.000458578
LOC_Os01g36850	20.1665	1.38778e-17	7.35126	0.000458578
LOC_Os08g03290	31017.6	9150.66	1.76112	0.000460033
LOC_Os04g44530	964.166	275.931	1.80445	0.000460033
LOC_Os04g47780	348.271	1212.7	-1.79962	0.000463484
LOC_Os07g06990	367.307	100.008	1.8754	0.000465576
LOC_Os06g01950	202.695	717.077	-1.82227	0.000468566
LOC_Os12g15440	2.24971	33.9253	-3.84882	0.000472075
LOC_Os09g11780	4.48923	41.0694	-3.16195	0.000472075
LOC_Os07g43220	4.48923	41.0694	-3.16195	0.000472075
LOC_Os09g02430	4.48923	41.0694	-3.16195	0.000472075
LOC_Os11g33030	79.5164	300.042	-1.91441	0.000474959
LOC_Os01g60790	860.024	245.569	1.80766	0.00047563
LOC_Os03g50120	76.157	14.279	2.40383	0.000475661
LOC_Os05g50440	77.2768	292.898	-1.92082	0.000478993
novel.602	1562.14	5301.79	-1.76288	0.000479002
LOC_Os10g28340	622.624	175.914	1.82266	0.000479002
LOC_Os10g03890	15.6873	81.2548	-2.36475	0.000479737
LOC_Os06g48990	19.0467	95.543	-2.31999	0.000479737
LOC_Os11g01480	19.0467	95.543	-2.31999	0.000479737
LOC_Os04g37750	17.9269	88.3989	-2.29491	0.000480565
LOC_Os06g06490	1013.44	292.005	1.7947	0.000482751
novel.293	328.114	1140.36	-1.79689	0.000483723
LOC_Os01g10280	557.675	156.268	1.83447	0.000486808
LOC_Os09g39180	5544.19	1637.77	1.75916	0.000488805
LOC_Os05g40270	647.26	2214.65	-1.7745	0.000488805
LOC_Os02g36220	26.8854	119.654	-2.14947	0.000490504
LOC_Os02g38210	29584.3	8779.16	1.75266	0.00049344
LOC_Os02g51130	179.179	44.6414	2.00157	0.000493669
LOC_Os07g05000	11482.5	3403.25	1.75441	0.000493669
LOC_Os02g10860	1507.27	438.459	1.7811	0.000493669
LOC_Os02g56080	73.9174	282.182	-1.93109	0.000493897
LOC_Os09g12290	7277.65	2154.82	1.75584	0.000495202
LOC_Os03g24844	137.747	33.0323	2.05545	0.000495251
LOC_Os04g33990	222.852	58.0366	1.93848	0.000495251
LOC_Os05g44610	25.7656	1.77656	3.76001	0.000495251
LOC_Os04g52650	1.12998	24.9952	-4.33625	0.000495251
LOC_Os08g25290	25.7656	0.883542	4.66913	0.000495251
LOC_Os10g42110	25.7656	1.77656	3.76001	0.000495251
LOC_Os01g55190	25.7656	0.883542	4.66913	0.000495251
LOC_Os10g19331	1.12998	24.9952	-4.33625	0.000495251
LOC_Os02g37990	1.12998	24.1021	-4.28405	0.000495251
LOC_Os02g53100	1.12998	24.9952	-4.33625	0.000495251
LOC_Os02g06600	1.12998	24.9952	-4.33625	0.000495251
LOC_Os06g48800	202.695	713.505	-1.81507	0.000496129
LOC_Os03g08170	153.424	547.406	-1.83436	0.000509122
novel.528	191.497	48.2135	1.9867	0.00050955
LOC_Os09g14410	227.331	794.769	-1.80526	0.00051414
LOC_Os05g06399	265.405	70.5387	1.90961	0.000517441
LOC_Os03g37830	1938.4	6524.32	-1.75091	0.000521044
LOC_Os01g59110	285.561	76.7898	1.89289	0.000521941
LOC_Os11g09160	231.811	60.7156	1.93036	0.000525254
LOC_Os02g05744	174.7	616.167	-1.81781	0.000525254
LOC_Os12g44390	250.847	874.247	-1.80079	0.000525254
LOC_Os01g63010	278.843	75.0038	1.89245	0.000527729
LOC_Os08g25700	784.996	225.922	1.79622	0.000529729
LOC_Os01g70830	68.3183	259.857	-1.9257	0.000532204
LOC_Os04g33940	2801.77	828.704	1.75724	0.000532204
LOC_Os08g08690	6.72881	48.2135	-2.8207	0.000532204
LOC_Os02g42960	6217.19	1851.2	1.74773	0.000532654
LOC_Os01g36720	563.274	1916.39	-1.76629	0.000534903
LOC_Os01g47820	26.8854	117.868	-2.12779	0.000535958
LOC_Os02g16709	180.299	45.5344	1.98206	0.000537149
LOC_Os11g07680	11.208	66.0737	-2.54781	0.000540241
LOC_Os02g46370	88.4749	18.7441	2.23047	0.000540242
LOC_Os02g11000	452.413	1543.11	-1.76989	0.000542385
LOC_Os01g05870	13.4476	73.2177	-2.43525	0.000544452
LOC_Os08g06530	19587.7	5862.6	1.74031	0.000547941
LOC_Os06g48950	90.7145	333.083	-1.87524	0.000547941
LOC_Os03g47610	105.272	23.2091	2.17466	0.000553924
LOC_Os04g42010	328.114	89.2919	1.87595	0.000554356
LOC_Os11g29400	624.864	178.593	1.80605	0.000556378
LOC_Os04g47520	329.234	1129.65	-1.77836	0.00056174
LOC_Os03g56944	45.9221	6.24181	2.85222	0.000562803
LOC_Os11g13670	490.486	138.407	1.82424	0.000563995
LOC_Os01g62350	264.285	70.5387	1.90351	0.000564833
LOC_Os09g20000	57.1202	9.8139	2.52451	0.000565324
LOC_Os11g35420	111.991	405.417	-1.85503	0.000575167
novel.682	509.523	144.659	1.81549	0.000578184
LOC_Os12g26880	108.631	24.1021	2.16577	0.000578786
LOC_Os06g40450	657.338	2216.44	-1.75337	0.000579073
LOC_Os03g17910	279.962	75.8968	1.88118	0.000582825
LOC_Os01g46120	31.3646	133.942	-2.09059	0.000584611
LOC_Os04g30420	2309.06	686.715	1.74931	0.000584727
LOC_Os02g53400	29.125	2.66963	3.38274	0.000584727
LOC_Os03g59210	29.125	2.66963	3.38274	0.000584727
LOC_Os09g20250	29.125	2.66963	3.38274	0.000584727
LOC_Os09g07640	257.566	886.749	-1.78316	0.000585202
LOC_Os02g52210	362.828	100.901	1.8449	0.000586814
LOC_Os01g64170	145.585	35.7113	2.02317	0.000588274
LOC_Os03g53000	101.913	22.3161	2.1842	0.000588274
novel.296	4.48923	40.1764	-3.13034	0.000588594
LOC_Os01g18230	41.4429	5.34877	2.92225	0.000588594
LOC_Os11g35980	4.48923	40.1764	-3.13034	0.000588594
LOC_Os10g13550	1965.28	584.019	1.7504	0.000590509
LOC_Os06g37300	225.092	779.588	-1.79171	0.000590509
LOC_Os02g04510	16977.4	5113.36	1.73125	0.000591247
LOC_Os04g09530	165.742	41.0694	2.00912	0.00059311
LOC_Os06g37610	1688.68	500.969	1.75282	0.00059311
LOC_Os02g40700	501.685	142.872	1.81104	0.000593251
LOC_Os07g07220	265.405	71.4317	1.89149	0.000596638
LOC_Os08g16580	98.5532	357.195	-1.8566	0.000597887
novel.314	3787.2	1135.9	1.73717	0.000598085
LOC_Os06g27680	381.865	106.259	1.8441	0.000602379
LOC_Os04g41810	52.641	8.02786	2.69245	0.000604248
LOC_Os01g73650	71.6778	267.001	-1.89567	0.000604908
LOC_Os08g14000	3.36946	36.6043	-3.39859	0.000607004
LOC_Os01g55020	38.0835	4.45574	3.05716	0.000607004
LOC_Os05g27034	3.36946	36.6043	-3.39859	0.000607004
LOC_Os11g31705	53.7608	207.169	-1.94405	0.000607398
LOC_Os09g28180	17.9269	86.6129	-2.26551	0.000607398
novel.380	33.6042	3.56269	3.18941	0.000609857
LOC_Os04g03990	33.6042	3.56269	3.18941	0.000609857
LOC_Os04g44590	632.702	182.165	1.79549	0.000611007
LOC_Os04g26320	1291.15	381.306	1.75926	0.000611007
LOC_Os07g30800	334.833	92.8639	1.84867	0.000611898
LOC_Os11g01154	221.732	763.514	-1.78334	0.000613528
LOC_Os12g41715	314.676	86.6129	1.85952	0.000614162
LOC_Os06g37080	80.6363	16.958	2.2402	0.000616038
LOC_Os05g39350	120.949	432.207	-1.8364	0.000617712
LOC_Os11g34610	25.7656	113.403	-2.13326	0.000619314
LOC_Os02g49820	499.445	142.872	1.80458	0.000619472
LOC_Os04g53490	1034.71	304.507	1.76421	0.000619803
LOC_Os12g38560	641.661	185.737	1.78777	0.000619803
LOC_Os10g21910	2366.17	7837.93	-1.72788	0.000619803
LOC_Os03g09930	155.663	544.727	-1.8064	0.000622432
LOC_Os06g12876	87.3551	318.795	-1.86638	0.000627693
LOC_Os06g04290	1286.67	381.306	1.75425	0.000633584
LOC_Os03g49730	107.512	24.1021	2.15083	0.000634425
LOC_Os03g21060	300.119	1021.59	-1.76685	0.000635718
LOC_Os08g09930	90.7145	19.6371	2.19981	0.000637286
LOC_Os02g49600	69.4382	258.964	-1.89732	0.000639363
LOC_Os08g05530	337.073	93.757	1.8445	0.000639363
LOC_Os02g56840	459.132	130.37	1.81518	0.000640235
LOC_Os06g11610	117.59	27.6742	2.08162	0.000640235
LOC_Os02g40500	795.075	233.066	1.76973	0.000640564
LOC_Os07g40130	48.1618	7.13483	2.73162	0.000644959
LOC_Os09g26580	2125.41	637.6	1.73679	0.000649738
LOC_Os02g49340	100.793	22.3161	2.16828	0.0006499
LOC_Os01g23710	211.654	726.008	-1.77776	0.000653035
LOC_Os07g40000	1198.21	355.409	1.75292	0.000653834
LOC_Os06g08460	14.5675	75.0038	-2.3555	0.000663709
novel.362	14.5675	75.0038	-2.3555	0.000663709
LOC_Os03g05620	1034.71	3422.9	-1.72588	0.000664152
LOC_Os11g08569	1.38778e-17	18.7441	-7.24781	0.000664152
LOC_Os09g31430	19.0467	1.38778e-17	7.26932	0.000664152
LOC_Os01g42210	19.0467	1.38778e-17	7.26932	0.000664152
LOC_Os01g41770	1.38778e-17	18.7441	-7.24781	0.000664152
LOC_Os01g22570	19.0467	1.38778e-17	7.26932	0.000664152
LOC_Os07g13050	19.0467	1.38778e-17	7.26932	0.000664152
LOC_Os04g54600	1.38778e-17	18.7441	-7.24781	0.000664152
LOC_Os06g20800	1.38778e-17	18.7441	-7.24781	0.000664152
LOC_Os01g72540	19.0467	1.38778e-17	7.26932	0.000664152
LOC_Os02g17920	6375.08	1936.04	1.71927	0.000666909
LOC_Os02g08018	53.7608	205.383	-1.93156	0.00067456
LOC_Os03g04970	298.999	83.0408	1.84649	0.000680996
LOC_Os03g51440	219.493	58.9296	1.8946	0.000681943
LOC_Os03g53230	604.707	2010.15	-1.73282	0.000683014
LOC_Os03g28289	86.2353	18.7441	2.19353	0.000683014
LOC_Os03g51470	24.6457	0.883542	4.60532	0.000686817
LOC_Os04g53320	24.6457	0.883542	4.60532	0.000686817
novel.66	44.8023	6.24181	2.81669	0.000689726
LOC_Os12g36110	108.631	384.878	-1.82394	0.000694081
LOC_Os06g37620	108.631	385.771	-1.82728	0.000694081
LOC_Os04g43710	20.1665	95.543	-2.23805	0.000694292
LOC_Os05g28750	1021.28	303.614	1.74959	0.00070029
LOC_Os01g42690	79.5164	16.065	2.29748	0.00070029
LOC_Os01g12650	116.47	27.6742	2.06783	0.000701718
LOC_Os03g48140	1014.56	3338.95	-1.71844	0.00070851
LOC_Os07g28020	39.2033	158.054	-2.00839	0.00070851
LOC_Os03g19380	6213.83	1897.64	1.71121	0.000715346
LOC_Os05g34830	780.517	230.387	1.75975	0.000716007
LOC_Os01g19840	1034.71	308.972	1.74322	0.000719751
LOC_Os02g50010	884.659	262.536	1.75206	0.000719751
LOC_Os06g11320	129.908	31.2462	2.05086	0.000721318
LOC_Os07g15770	40.3231	161.626	-2.00008	0.000723546
[truncated: 3,489 more rows]
