# Supplementary material for: ThSCSP_12: Novel Effector in Tilletia horrida That Induces Cell Death and Defense Responses in Non-Host Plants
Source: Int J Mol Sci. 2022 Nov 25;23(23):14752. doi: 10.3390/ijms232314752 (PMC9736266; doi:10.3390/ijms232314752)
Supplement: Supplementary file 1 [file ijms-23-14752-s001.zip › Supplementary Table S3.xlsx]

## Sheet: Sheet1
Supplementary Table S3 The enriched pathways of up-regulated expression DEGs.
KEGGID	Description	GeneRatio	padj	geneID
osa03008	Ribosome biogenesis in eukaryotes	20/361	0.000826255	LOC_Os06g39875/LOC_Os07g41190/LOC_Os03g13800/LOC_Os02g01350/LOC_Os12g41620/LOC_Os01g27730/LOC_Os05g49890/LOC_Os03g61790/LOC_Os03g18840/LOC_Os02g57590/LOC_Os05g08360/LOC_Os11g45250/LOC_Os07g12320/LOC_Os07g44190/LOC_Os06g16290/LOC_Os03g22880/LOC_Os03g22730/LOC_Os03g21530/LOC_Os02g18830/LOC_Os12g07300
osa00196	Photosynthesis - antenna proteins	6/361	0.0174479	LOC_Os01g41710/LOC_Os03g39610/LOC_Os09g17740/LOC_Os07g37240/LOC_Os09g26810/LOC_Os04g38410
osa03010	Ribosome	40/361	0.0363473	LOC_Os05g45920/LOC_Os06g35730/LOC_Os01g41030/LOC_Os07g43310/LOC_Os02g01230/LOC_Os08g21840/LOC_Os01g62350/LOC_Os05g49320/LOC_Os05g48220/LOC_Os08g27090/LOC_Os01g62210/LOC_Os05g11710/novel.706/LOC_Os05g28750/LOC_Os05g48310/LOC_Os05g48410/novel.501/LOC_Os03g18580/LOC_Os01g42980/LOC_Os01g59730/LOC_Os01g67134/LOC_Os01g52490/LOC_Os02g28810/LOC_Os01g73160/LOC_Os03g26229/LOC_Os02g07890/LOC_Os04g50990/nove…
osa00290	Valine, leucine and isoleucine biosynthesis	5/361	0.358008	LOC_Os05g49800/LOC_Os08g44530/LOC_Os12g04440/LOC_Os02g39570/LOC_Os11g04670
osa00230	Purine metabolism	14/361	0.358008	LOC_Os03g56800/LOC_Os03g19930/LOC_Os07g46630/LOC_Os05g18790/LOC_Os12g36194/LOC_Os03g61600/LOC_Os08g09210/LOC_Os01g10280/LOC_Os05g28180/LOC_Os10g41410/LOC_Os07g30150/LOC_Os08g44300/LOC_Os10g31940/LOC_Os03g31550
osa00908	Zeatin biosynthesis	5/361	0.465234	LOC_Os10g34230/LOC_Os11g35300/LOC_Os05g47840/LOC_Os01g56810/LOC_Os07g46610
osa03018	RNA degradation	14/361	0.504577	LOC_Os06g04510/LOC_Os03g63720/LOC_Os10g32550/LOC_Os06g02380/novel.503/LOC_Os09g31486/LOC_Os05g46290/LOC_Os01g47256/LOC_Os03g04970/LOC_Os02g01280/LOC_Os02g53420/LOC_Os03g02260/LOC_Os09g10760/LOC_Os10g30100
osa00261	Monobactam biosynthesis	3/361	0.565125	LOC_Os03g63330/LOC_Os09g12290/LOC_Os03g55280
osa01210	2-Oxocarboxylic acid metabolism	8/361	0.565125	LOC_Os03g63330/LOC_Os03g31690/LOC_Os05g49800/LOC_Os08g44530/LOC_Os12g04440/LOC_Os02g39570/LOC_Os03g55280/LOC_Os11g04670
osa01230	Biosynthesis of amino acids	25/361	0.565125	LOC_Os03g63330/LOC_Os03g18130/LOC_Os06g04510/LOC_Os06g45710/LOC_Os03g31690/LOC_Os09g12290/LOC_Os05g38150/LOC_Os05g48200/LOC_Os12g07210/LOC_Os01g49890/LOC_Os05g49800/LOC_Os03g04169/LOC_Os03g17730/LOC_Os01g62900/LOC_Os02g38920/LOC_Os01g62420/LOC_Os08g03290/LOC_Os08g44530/LOC_Os12g04440/LOC_Os02g39570/LOC_Os03g55280/LOC_Os11g04670/novel.702/LOC_Os05g47640/LOC_Os06g36880
osa00940	Phenylpropanoid biosynthesis	16/361	0.565125	LOC_Os09g23540/LOC_Os09g23550/LOC_Os08g39860/LOC_Os02g14440/LOC_Os10g39170/LOC_Os10g02040/LOC_Os01g32364/LOC_Os12g33610/LOC_Os03g12270/LOC_Os08g39870/LOC_Os02g11720/LOC_Os09g33690/LOC_Os06g21570/LOC_Os03g53800/LOC_Os06g08570/LOC_Os01g16450
osa00780	Biotin metabolism	4/361	0.565125	LOC_Os07g42420/LOC_Os04g36800/LOC_Os05g36000/LOC_Os06g08600
osa00300	Lysine biosynthesis	3/361	0.565125	LOC_Os03g63330/LOC_Os09g12290/LOC_Os03g55280
osa00906	Carotenoid biosynthesis	5/361	0.573887	LOC_Os10g38940/LOC_Os03g44380/LOC_Os04g37619/LOC_Os12g42280/LOC_Os08g36860
osa00460	Cyanoamino acid metabolism	7/361	0.573887	LOC_Os08g39860/LOC_Os01g32364/LOC_Os01g05820/LOC_Os08g39870/LOC_Os09g33690/LOC_Os06g21570/LOC_Os03g53800
osa00270	Cysteine and methionine metabolism	13/361	0.699234	LOC_Os03g63330/LOC_Os03g21960/LOC_Os09g12290/LOC_Os05g49880/LOC_Os10g28340/LOC_Os10g28350/LOC_Os09g27820/LOC_Os03g06630/LOC_Os05g39770/novel.380/LOC_Os03g55280/LOC_Os12g41390/LOC_Os06g36880
osa00310	Lysine degradation	6/361	0.717286	LOC_Os08g30910/LOC_Os08g10470/LOC_Os03g49730/LOC_Os09g26880/LOC_Os08g30870/LOC_Os04g34610
osa03410	Base excision repair	6/361	0.717286	LOC_Os02g32860/LOC_Os10g34750/LOC_Os01g58690/LOC_Os01g58680/LOC_Os08g07840/LOC_Os04g54500
osa03030	DNA replication	7/361	0.731142	LOC_Os05g02040/LOC_Os10g34750/LOC_Os05g15520/LOC_Os04g40050/LOC_Os03g57870/LOC_Os08g07840/LOC_Os04g54500
osa04016	MAPK signaling pathway - plant	14/361	0.731142	LOC_Os05g38290/LOC_Os01g46760/LOC_Os02g53720/LOC_Os09g15670/LOC_Os03g16170/LOC_Os08g39830/LOC_Os05g46240/LOC_Os10g39680/LOC_Os01g40094/LOC_Os01g28450/novel.479/LOC_Os12g36194/LOC_Os01g62760/LOC_Os10g41410
osa00260	Glycine, serine and threonine metabolism	8/361	0.754791	LOC_Os03g63330/LOC_Os03g21960/LOC_Os09g12290/LOC_Os01g49890/LOC_Os09g26880/LOC_Os05g39770/LOC_Os03g55280/LOC_Os05g47640
osa00053	Ascorbate and aldarate metabolism	6/361	0.764865	LOC_Os07g49400/LOC_Os04g51300/LOC_Os02g34810/LOC_Os09g26880/LOC_Os06g37080/LOC_Os12g07830
osa00250	Alanine, aspartate and glutamate metabolism	6/361	0.764865	LOC_Os03g18130/LOC_Os03g21960/LOC_Os05g48200/LOC_Os03g19930/LOC_Os04g37500/LOC_Os05g39770
osa00500	Starch and sucrose metabolism	15/361	0.764865	LOC_Os03g55090/LOC_Os08g39860/LOC_Os10g32810/LOC_Os10g37660/LOC_Os01g32364/LOC_Os08g31630/LOC_Os08g39870/LOC_Os09g33690/LOC_Os06g04200/LOC_Os06g21570/LOC_Os05g45590/LOC_Os01g52250/LOC_Os03g53800/LOC_Os05g32710/LOC_Os02g51680
osa00100	Steroid biosynthesis	4/361	0.764865	LOC_Os08g41780/LOC_Os03g04340/LOC_Os03g01820/LOC_Os03g59040
osa00511	Other glycan degradation	3/361	0.764865	LOC_Os11g32369/LOC_Os09g34920/LOC_Os11g32260
osa00770	Pantothenate and CoA biosynthesis	4/361	0.860538	LOC_Os05g49800/LOC_Os01g12560/LOC_Os08g44530/LOC_Os02g39570
osa00730	Thiamine metabolism	3/361	0.861162	LOC_Os03g47610/LOC_Os07g34570/LOC_Os05g33840
osa00061	Fatty acid biosynthesis	5/361	0.86961	LOC_Os03g30950/LOC_Os07g42420/LOC_Os04g36800/LOC_Os05g36000/LOC_Os06g08600
osa00750	Vitamin B6 metabolism	2/361	0.86961	LOC_Os01g49890/LOC_Os05g47640
osa00240	Pyrimidine metabolism	6/361	0.86961	LOC_Os01g73450/LOC_Os01g46570/LOC_Os12g36194/LOC_Os10g41410/LOC_Os05g49770/LOC_Os05g38170
osa00480	Glutathione metabolism	10/361	0.86961	LOC_Os03g29950/LOC_Os10g38740/LOC_Os07g49400/LOC_Os03g50130/LOC_Os11g29400/LOC_Os04g51300/LOC_Os02g34810/LOC_Os01g05820/LOC_Os12g07830/LOC_Os07g07320
osa03013	RNA transport	15/361	0.964875	LOC_Os06g39875/LOC_Os09g30466/LOC_Os06g32730/LOC_Os11g18830/LOC_Os03g12450/LOC_Os01g13150/LOC_Os10g06610/LOC_Os04g51900/LOC_Os02g17360/LOC_Os05g49890/LOC_Os12g06870/LOC_Os05g28510/LOC_Os11g45250/LOC_Os03g07580/LOC_Os09g10760
osa04712	Circadian rhythm - plant	4/361	0.964875	novel.69/LOC_Os01g08700/LOC_Os04g41130/LOC_Os03g17570
osa01212	Fatty acid metabolism	7/361	0.964875	LOC_Os03g30950/LOC_Os07g42420/LOC_Os08g30340/LOC_Os04g36800/LOC_Os05g36000/LOC_Os04g02620/LOC_Os06g08600
osa01040	Biosynthesis of unsaturated fatty acids	3/361	0.964875	LOC_Os03g30950/LOC_Os08g30340/LOC_Os04g02620
osa00970	Aminoacyl-tRNA biosynthesis	6/361	0.964875	LOC_Os08g42560/LOC_Os11g39670/LOC_Os07g06940/LOC_Os12g35570/LOC_Os08g05490/LOC_Os06g43760
osa00380	Tryptophan metabolism	5/361	0.964875	LOC_Os09g17560/LOC_Os01g16750/LOC_Os09g26880/LOC_Os08g04560/LOC_Os10g02840
osa00590	Arachidonic acid metabolism	2/361	0.964875	LOC_Os01g05820/LOC_Os04g17050
osa03430	Mismatch repair	4/361	0.964875	LOC_Os05g02040/LOC_Os10g34750/LOC_Os05g15520/LOC_Os03g57870
osa00790	Folate biosynthesis	3/361	0.964875	LOC_Os01g13690/LOC_Os05g15530/LOC_Os02g17330
osa00710	Carbon fixation in photosynthetic organisms	7/361	0.980856	LOC_Os06g45710/LOC_Os12g07210/LOC_Os05g49880/LOC_Os02g38920/LOC_Os01g62420/LOC_Os08g03290/LOC_Os12g17600
osa00195	Photosynthesis	7/361	0.999785	LOC_Os07g05360/LOC_Os04g59440/LOC_Os07g05365/LOC_Os03g21560/LOC_Os08g35420/LOC_Os05g43310/LOC_Os07g25430
osa00052	Galactose metabolism	5/361	0.999785	LOC_Os10g35070/LOC_Os03g59430/LOC_Os07g48160/LOC_Os05g45590/LOC_Os11g24800
osa03440	Homologous recombination	6/361	0.999785	LOC_Os02g48100/LOC_Os05g02040/LOC_Os05g15520/LOC_Os01g67510/LOC_Os08g07840/LOC_Os04g54500
osa00073	Cutin, suberine and wax biosynthesis	2/361	0.999785	LOC_Os03g12230/novel.504
osa04141	Protein processing in endoplasmic reticulum	17/361	0.999785	LOC_Os02g52150/LOC_Os06g14240/LOC_Os03g15960/LOC_Os03g16020/LOC_Os09g29840/LOC_Os01g08860/LOC_Os12g32986/LOC_Os06g11610/LOC_Os08g38086/LOC_Os03g61670/LOC_Os05g38530/LOC_Os03g16030/LOC_Os01g04370/LOC_Os01g04360/LOC_Os05g23740/LOC_Os06g28770/LOC_Os08g44670
osa00340	Histidine metabolism	2/361	0.999785	LOC_Os03g04169/LOC_Os09g26880
osa00860	Porphyrin and chlorophyll metabolism	4/361	0.999785	LOC_Os04g58200/LOC_Os10g35370/LOC_Os06g04150/LOC_Os08g41990
osa03020	RNA polymerase	4/361	0.999785	LOC_Os11g08940/LOC_Os10g35290/LOC_Os06g40110/LOC_Os11g40090
osa03420	Nucleotide excision repair	6/361	0.999785	LOC_Os05g02040/LOC_Os10g34750/LOC_Os05g15520/LOC_Os03g57870/LOC_Os08g07840/LOC_Os04g54500
osa00051	Fructose and mannose metabolism	5/361	0.999785	LOC_Os06g44260/LOC_Os08g43190/LOC_Os12g07210/LOC_Os01g62420/LOC_Os05g45590
osa00904	Diterpenoid biosynthesis	3/361	0.999785	LOC_Os07g01340/LOC_Os02g17780/LOC_Os04g44150
osa03450	Non-homologous end-joining	1/361	0.999785	LOC_Os07g08729
osa00620	Pyruvate metabolism	7/361	0.999785	LOC_Os06g15390/LOC_Os05g49880/LOC_Os09g26880/LOC_Os12g08170/LOC_Os04g02900/LOC_Os12g04440/LOC_Os11g04670
osa00945	Stilbenoid, diarylheptanoid and gingerol biosynthesis	1/361	0.999785	LOC_Os06g08570
osa00330	Arginine and proline metabolism	4/361	0.999785	LOC_Os05g38150/LOC_Os01g62900/LOC_Os09g26880/LOC_Os03g44150
osa00600	Sphingolipid metabolism	2/361	0.999785	LOC_Os10g35070/LOC_Os07g48160
osa00650	Butanoate metabolism	2/361	0.999785	LOC_Os04g37500/LOC_Os02g39570
osa00900	Terpenoid backbone biosynthesis	4/361	0.999785	LOC_Os02g10400/LOC_Os08g09370/LOC_Os07g36190/LOC_Os05g33840
osa00910	Nitrogen metabolism	2/361	0.999785	LOC_Os05g48200/LOC_Os02g33030
osa03040	Spliceosome	14/361	0.999785	LOC_Os03g49430/LOC_Os07g43950/LOC_Os09g31482/LOC_Os03g13800/LOC_Os05g38530/LOC_Os04g56760/LOC_Os07g07220/LOC_Os03g25770/LOC_Os11g43620/LOC_Os05g23740/LOC_Os12g31800/LOC_Os08g05530/LOC_Os05g30140/LOC_Os10g17454
osa04075	Plant hormone signal transduction	15/361	0.999785	LOC_Os05g38290/novel.69/LOC_Os01g46760/LOC_Os02g42990/LOC_Os09g15670/LOC_Os10g42110/LOC_Os03g16170/LOC_Os08g39830/LOC_Os01g40094/LOC_Os01g28450/LOC_Os01g72330/novel.479/LOC_Os01g62760/LOC_Os02g52780/LOC_Os05g09410
osa00030	Pentose phosphate pathway	4/361	0.999785	LOC_Os03g29950/LOC_Os12g07210/LOC_Os11g29400/LOC_Os03g30300
osa00531	Glycosaminoglycan degradation	1/361	0.999785	LOC_Os06g08090
osa04933	AGE-RAGE signaling pathway in diabetic complications	1/361	0.999785	LOC_Os01g12900
osa00010	Glycolysis / Gluconeogenesis	10/361	0.999785	LOC_Os06g04510/LOC_Os06g45710/LOC_Os12g07210/LOC_Os09g26880/LOC_Os02g38920/LOC_Os01g62420/LOC_Os08g03290/LOC_Os12g08170/LOC_Os04g02900/LOC_Os05g45590
osa00591	Linoleic acid metabolism	1/361	0.999785	LOC_Os02g10120
osa00905	Brassinosteroid biosynthesis	1/361	0.999785	LOC_Os07g04410
osa00592	alpha-Linolenic acid metabolism	3/361	0.999785	LOC_Os05g01140/LOC_Os06g11290/LOC_Os02g10120
osa00062	Fatty acid elongation	2/361	0.999785	LOC_Os08g30340/LOC_Os04g02620
osa00670	One carbon pool by folate	1/361	0.999785	LOC_Os05g18790
osa00280	Valine, leucine and isoleucine degradation	3/361	0.999785	LOC_Os03g21960/LOC_Os09g26880/LOC_Os05g39770
osa03060	Protein export	3/361	0.999785	LOC_Os02g16709/LOC_Os03g02480/LOC_Os06g28770
osa04145	Phagosome	5/361	0.999785	LOC_Os01g12900/LOC_Os03g61670/LOC_Os01g59150/LOC_Os01g18050/LOC_Os08g44670
osa01200	Carbon metabolism	18/361	0.999785	LOC_Os06g04510/LOC_Os06g45710/LOC_Os03g29950/LOC_Os12g07210/LOC_Os05g49880/LOC_Os11g29400/LOC_Os03g30300/LOC_Os02g38920/LOC_Os01g62420/LOC_Os08g03290/LOC_Os06g29180/LOC_Os01g71300/LOC_Os12g08170/LOC_Os04g02900/LOC_Os07g42440/LOC_Os05g45590/LOC_Os12g17600/LOC_Os06g36880
osa00020	Citrate cycle (TCA cycle)	3/361	0.999785	LOC_Os05g49880/LOC_Os12g08170/LOC_Os04g02900
osa00950	Isoquinoline alkaloid biosynthesis	1/361	0.999785	LOC_Os08g04560
osa00630	Glyoxylate and dicarboxylate metabolism	4/361	0.999785	LOC_Os05g49880/LOC_Os06g29180/LOC_Os07g42440/LOC_Os12g17600
osa00410	beta-Alanine metabolism	2/361	0.999785	LOC_Os04g37500/LOC_Os09g26880
osa00941	Flavonoid biosynthesis	1/361	0.999785	LOC_Os06g08570
osa00360	Phenylalanine metabolism	2/361	0.999785	LOC_Os12g33610/LOC_Os08g04560
osa00561	Glycerolipid metabolism	4/361	0.999785	LOC_Os10g35070/LOC_Os09g26880/LOC_Os07g48160/LOC_Os12g37600
osa00562	Inositol phosphate metabolism	3/361	0.999785	LOC_Os01g72520/LOC_Os11g04900/LOC_Os01g62420
osa00565	Ether lipid metabolism	1/361	0.999785	LOC_Os01g72520
osa02010	ABC transporters	1/361	0.999785	LOC_Os01g34970
osa00513	Various types of N-glycan biosynthesis	1/361	0.999785	LOC_Os06g13650
osa00520	Amino sugar and nucleotide sugar metabolism	7/361	0.999785	LOC_Os05g15770/LOC_Os06g44260/LOC_Os11g47570/LOC_Os04g51880/LOC_Os10g39680/LOC_Os11g03160/LOC_Os05g45590
osa00220	Arginine biosynthesis	1/361	0.999785	LOC_Os03g31690
osa00400	Phenylalanine, tyrosine and tryptophan biosynthesis	2/361	0.999785	LOC_Os03g17730/novel.702
osa00564	Glycerophospholipid metabolism	5/361	0.999785	LOC_Os05g47540/LOC_Os01g72520/LOC_Os12g37600/LOC_Os05g48060/LOC_Os08g44300
osa00920	Sulfur metabolism	1/361	0.999785	LOC_Os06g36880
osa00040	Pentose and glucuronate interconversions	1/361	0.999785	LOC_Os08g43190
osa00130	Ubiquinone and other terpenoid-quinone biosynthesis	1/361	0.999785	LOC_Os04g42870
osa00510	N-Glycan biosynthesis	1/361	0.999785	LOC_Os06g13650
osa04146	Peroxisome	3/361	0.999785	LOC_Os12g32330/LOC_Os07g42440/LOC_Os03g31550
osa00071	Fatty acid degradation	1/361	0.999785	LOC_Os09g26880
osa00350	Tyrosine metabolism	1/361	0.999785	LOC_Os08g04560
osa04144	Endocytosis	5/361	0.999785	LOC_Os05g44610/LOC_Os11g04900/LOC_Os05g38530/LOC_Os03g43860/LOC_Os05g23740
osa04070	Phosphatidylinositol signaling system	1/361	0.999785	LOC_Os11g04900
osa03015	mRNA surveillance pathway	2/361	0.999785	LOC_Os05g48150/LOC_Os09g10760
osa04626	Plant-pathogen interaction	5/361	0.999785	LOC_Os09g29840/LOC_Os12g32986/LOC_Os08g38086/LOC_Os09g15580/LOC_Os01g28450
osa04120	Ubiquitin mediated proteolysis	2/361	0.999785	LOC_Os01g52110/LOC_Os06g46540
