# Supplementary material for: ThSCSP_12: Novel Effector in Tilletia horrida That Induces Cell Death and Defense Responses in Non-Host Plants
Source: Int J Mol Sci. 2022 Nov 25;23(23):14752. doi: 10.3390/ijms232314752 (PMC9736266; doi:10.3390/ijms232314752)
Supplement: Supplementary file 1 [file ijms-23-14752-s001.zip › Supplementary Table S4.xlsx]

## Sheet: Sheet1
Supplementary Table S4 The enriched pathways of down-regulated expression DEGs.
KEGGID	Description	GeneRatio	padj	geneID
osa00904	Diterpenoid biosynthesis	13/220	4.33261e-07	LOC_Os11g28530/LOC_Os02g36110/LOC_Os04g09900/LOC_Os02g36264/LOC_Os02g36190/LOC_Os02g36070/LOC_Os04g10010/LOC_Os04g09920/LOC_Os02g36280/LOC_Os02g36140/LOC_Os02g36210/LOC_Os05g43880/LOC_Os04g10160
osa00940	Phenylpropanoid biosynthesis	23/220	3.46319e-06	LOC_Os05g35290/LOC_Os02g41630/LOC_Os08g34280/LOC_Os02g41680/LOC_Os08g34790/LOC_Os02g41650/LOC_Os10g36848/LOC_Os02g09490/LOC_Os02g41670/LOC_Os04g59150/LOC_Os06g20150/LOC_Os02g39850/LOC_Os07g48020/LOC_Os02g08100/LOC_Os01g22370/LOC_Os04g59200/LOC_Os06g06980/LOC_Os05g25640/LOC_Os04g39880/LOC_Os08g17500/LOC_Os02g46970/LOC_Os01g40860/LOC_Os09g33680
osa00941	Flavonoid biosynthesis	10/220	3.46319e-06	LOC_Os03g25150/LOC_Os11g32650/LOC_Os02g39850/LOC_Os04g53850/LOC_Os10g17260/LOC_Os11g02440/LOC_Os06g06980/LOC_Os01g53420/LOC_Os05g25640/LOC_Os12g02370
osa00944	Flavone and flavonol biosynthesis	5/220	0.00104658	LOC_Os03g25150/LOC_Os10g17260/LOC_Os01g08090/LOC_Os11g26950/LOC_Os01g08100
osa00400	Phenylalanine, tyrosine and tryptophan biosynthesis	10/220	0.00341897	LOC_Os07g42960/LOC_Os09g39260/LOC_Os06g04280/LOC_Os04g33390/LOC_Os06g23684/LOC_Os01g55870/LOC_Os06g12150/LOC_Os03g50880/LOC_Os02g16630/LOC_Os09g08130
osa00360	Phenylalanine metabolism	9/220	0.00341897	LOC_Os05g35290/LOC_Os02g41630/LOC_Os02g41680/LOC_Os02g41650/LOC_Os04g10530/LOC_Os02g41670/LOC_Os02g38010/LOC_Os04g02754/LOC_Os06g23684
osa04626	Plant-pathogen interaction	19/220	0.0153592	LOC_Os09g26660/LOC_Os08g35210/LOC_Os02g30190/LOC_Os09g09490/LOC_Os05g45210/LOC_Os06g48520/LOC_Os07g03750/LOC_Os11g11960/LOC_Os01g61080/LOC_Os05g39720/LOC_Os03g48270/LOC_Os03g53200/LOC_Os02g11070/LOC_Os07g03730/LOC_Os07g03740/LOC_Os05g24780/LOC_Os12g04360/LOC_Os11g12000/LOC_Os11g33120
osa00910	Nitrogen metabolism	6/220	0.0181921	LOC_Os01g36720/LOC_Os08g36480/LOC_Os08g36500/LOC_Os01g48960/LOC_Os02g50240/LOC_Os01g50820
osa01230	Biosynthesis of amino acids	20/220	0.0844166	LOC_Os03g12890/LOC_Os04g43650/LOC_Os07g42960/LOC_Os03g09910/LOC_Os12g42876/LOC_Os01g48960/LOC_Os06g05700/LOC_Os02g50240/LOC_Os09g39260/LOC_Os11g26860/LOC_Os06g04280/LOC_Os04g33390/LOC_Os04g32010/LOC_Os01g55870/LOC_Os06g12150/LOC_Os03g50880/LOC_Os02g16630/LOC_Os09g08130/LOC_Os05g04510/LOC_Os01g47080
osa04016	MAPK signaling pathway - plant	13/220	0.0844166	LOC_Os09g26660/LOC_Os08g35210/LOC_Os05g45210/LOC_Os07g03750/LOC_Os01g61080/LOC_Os05g39720/LOC_Os02g04230/LOC_Os03g53200/LOC_Os07g03730/LOC_Os07g03740/LOC_Os02g33600/LOC_Os11g33120/LOC_Os10g42430
osa00380	Tryptophan metabolism	7/220	0.0844166	LOC_Os01g16714/LOC_Os04g10530/LOC_Os12g07810/LOC_Os01g08270/LOC_Os04g02754/LOC_Os02g49720/LOC_Os04g03980
osa00945	Stilbenoid, diarylheptanoid and gingerol biosynthesis	3/220	0.0996747	LOC_Os02g39850/LOC_Os06g06980/LOC_Os05g25640
osa04075	Plant hormone signal transduction	17/220	0.13403	LOC_Os07g03750/LOC_Os07g42370/LOC_Os06g45950/LOC_Os03g28940/LOC_Os03g08320/LOC_Os12g41650/LOC_Os03g08330/LOC_Os06g41100/LOC_Os04g51890/LOC_Os10g25290/LOC_Os07g03730/LOC_Os01g59350/LOC_Os07g03740/LOC_Os10g32600/LOC_Os09g26780/LOC_Os04g36054/LOC_Os10g42430
osa00270	Cysteine and methionine metabolism	11/220	0.13403	LOC_Os03g12890/LOC_Os03g12110/LOC_Os05g05680/LOC_Os12g42876/LOC_Os03g07570/LOC_Os01g08270/LOC_Os06g05700/LOC_Os02g01510/LOC_Os09g27750/LOC_Os06g23684/LOC_Os05g04510
osa00450	Selenocompound metabolism	3/220	0.226366	LOC_Os12g42876/LOC_Os05g01470/LOC_Os03g53230
osa00561	Glycerolipid metabolism	8/220	0.226366	LOC_Os12g07810/LOC_Os01g47580/LOC_Os05g47660/LOC_Os03g31180/LOC_Os11g45400/LOC_Os01g04920/LOC_Os02g49720/LOC_Os01g62010
osa00130	Ubiquinone and other terpenoid-quinone biosynthesis	5/220	0.226366	LOC_Os08g34790/LOC_Os02g08100/LOC_Os05g25640/LOC_Os06g23684/LOC_Os02g46970
osa00511	Other glycan degradation	3/220	0.337805	LOC_Os10g19334/LOC_Os10g33420/LOC_Os10g19331
osa00350	Tyrosine metabolism	5/220	0.357325	LOC_Os02g38010/LOC_Os03g08999/LOC_Os11g14040/LOC_Os06g23684/LOC_Os02g42520
osa00053	Ascorbate and aldarate metabolism	5/220	0.371727	LOC_Os12g07810/LOC_Os10g28200/LOC_Os04g35520/LOC_Os02g49720/LOC_Os08g02230
osa00250	Alanine, aspartate and glutamate metabolism	5/220	0.371727	LOC_Os04g55710/LOC_Os01g48960/LOC_Os03g07570/LOC_Os02g50240/LOC_Os02g04170
osa04712	Circadian rhythm - plant	4/220	0.429627	LOC_Os11g32650/LOC_Os01g38530/LOC_Os11g05930/LOC_Os01g11940
osa00330	Arginine and proline metabolism	5/220	0.437739	LOC_Os04g10530/LOC_Os12g07810/LOC_Os10g40360/LOC_Os04g02754/LOC_Os02g49720
osa00920	Sulfur metabolism	4/220	0.454506	LOC_Os06g05700/LOC_Os07g37230/LOC_Os03g53230/LOC_Os03g10500
osa00960	Tropane, piperidine and pyridine alkaloid biosynthesis	3/220	0.542363	LOC_Os01g70525/LOC_Os02g38010/LOC_Os06g23684
osa02010	ABC transporters	3/220	0.542363	LOC_Os01g50100/LOC_Os08g05690/LOC_Os01g18670
osa00591	Linoleic acid metabolism	2/220	0.542363	LOC_Os08g39840/LOC_Os08g39850
osa00071	Fatty acid degradation	4/220	0.564414	LOC_Os12g07810/LOC_Os03g08999/LOC_Os02g42520/LOC_Os02g49720
osa00592	alpha-Linolenic acid metabolism	4/220	0.627411	novel.502/LOC_Os08g39840/LOC_Os03g12500/LOC_Os08g39850
osa00460	Cyanoamino acid metabolism	4/220	0.627411	LOC_Os04g55710/LOC_Os11g26860/LOC_Os04g39880/LOC_Os09g33680
osa00670	One carbon pool by folate	2/220	0.627411	LOC_Os03g60090/LOC_Os11g26860
osa00260	Glycine, serine and threonine metabolism	5/220	0.627411	LOC_Os04g43650/LOC_Os03g07570/LOC_Os02g38010/LOC_Os11g12290/LOC_Os11g26860
osa04070	Phosphatidylinositol signaling system	5/220	0.627411	LOC_Os03g48300/LOC_Os08g01390/LOC_Os03g53200/LOC_Os03g31180/LOC_Os12g37560
osa00280	Valine, leucine and isoleucine degradation	4/220	0.627411	LOC_Os03g12890/LOC_Os03g07570/LOC_Os12g07810/LOC_Os02g49720
osa00073	Cutin, suberine and wax biosynthesis	2/220	0.635546	LOC_Os07g30600/LOC_Os02g50140
osa00290	Valine, leucine and isoleucine biosynthesis	2/220	0.635546	LOC_Os03g12890/LOC_Os04g32010
osa00340	Histidine metabolism	2/220	0.646474	LOC_Os12g07810/LOC_Os02g49720
osa00760	Nicotinate and nicotinamide metabolism	2/220	0.646474	LOC_Os02g04170/LOC_Os04g35060
osa00730	Thiamine metabolism	2/220	0.673195	LOC_Os05g30454/LOC_Os07g09190
osa00908	Zeatin biosynthesis	2/220	0.681502	LOC_Os01g10110/LOC_Os10g09990
osa00950	Isoquinoline alkaloid biosynthesis	2/220	0.681502	LOC_Os02g38010/LOC_Os06g23684
osa00230	Purine metabolism	6/220	0.717127	LOC_Os04g58390/LOC_Os02g41590/LOC_Os06g45480/LOC_Os03g53230/LOC_Os03g10500/LOC_Os01g47080
osa00520	Amino sugar and nucleotide sugar metabolism	8/220	0.735287	LOC_Os06g08620/LOC_Os01g47070/LOC_Os10g28200/LOC_Os11g38810/LOC_Os05g29990/LOC_Os03g17000/LOC_Os09g15420/LOC_Os03g40270
osa00410	beta-Alanine metabolism	3/220	0.735287	LOC_Os12g07810/LOC_Os02g38010/LOC_Os02g49720
osa00061	Fatty acid biosynthesis	3/220	0.742228	LOC_Os03g53010/LOC_Os11g01154/LOC_Os10g31780
osa00480	Glutathione metabolism	6/220	0.742228	LOC_Os05g05620/LOC_Os10g38780/LOC_Os07g28480/LOC_Os04g35520/LOC_Os01g37750/LOC_Os01g27360
osa00790	Folate biosynthesis	2/220	0.805425	LOC_Os02g36340/LOC_Os06g48620
osa00261	Monobactam biosynthesis	1/220	0.817213	LOC_Os03g53230
osa00620	Pyruvate metabolism	5/220	0.821225	LOC_Os12g07810/LOC_Os02g01510/LOC_Os03g15050/LOC_Os02g49720/LOC_Os01g47080
osa00564	Glycerophospholipid metabolism	6/220	0.828923	LOC_Os08g42390/LOC_Os01g47580/LOC_Os05g47660/LOC_Os03g31180/LOC_Os05g07880/LOC_Os11g45400
osa00770	Pantothenate and CoA biosynthesis	2/220	0.834743	LOC_Os03g12890/LOC_Os04g32010
osa00300	Lysine biosynthesis	1/220	0.853932	LOC_Os03g09910
osa04933	AGE-RAGE signaling pathway in diabetic complications	1/220	0.871679	LOC_Os12g37560
osa00062	Fatty acid elongation	2/220	0.871679	LOC_Os02g11070/LOC_Os11g01154
osa00905	Brassinosteroid biosynthesis	1/220	0.892952	LOC_Os06g39880
osa00010	Glycolysis / Gluconeogenesis	7/220	0.899972	LOC_Os12g07810/LOC_Os02g01510/LOC_Os03g08999/LOC_Os02g42520/LOC_Os03g15050/LOC_Os02g49720/LOC_Os01g47080
osa00740	Riboflavin metabolism	1/220	0.936709	LOC_Os02g36340
osa00500	Starch and sucrose metabolism	7/220	0.941026	LOC_Os10g41550/LOC_Os01g51754/LOC_Os08g34580/LOC_Os06g46340/LOC_Os04g39880/LOC_Os09g33680/LOC_Os01g69030
osa00562	Inositol phosphate metabolism	3/220	0.977041	LOC_Os08g01390/LOC_Os02g54150/LOC_Os12g37560
osa00310	Lysine degradation	2/220	0.997058	LOC_Os12g07810/LOC_Os02g49720
osa00780	Biotin metabolism	1/220	0.997058	LOC_Os10g31780
osa01212	Fatty acid metabolism	3/220	0.999638	LOC_Os03g53010/LOC_Os11g01154/LOC_Os10g31780
osa00630	Glyoxylate and dicarboxylate metabolism	3/220	0.999638	LOC_Os11g12290/LOC_Os02g50240/LOC_Os11g26860
osa00600	Sphingolipid metabolism	1/220	0.999638	LOC_Os10g33420
osa00650	Butanoate metabolism	1/220	0.999638	LOC_Os04g32010
osa01210	2-Oxocarboxylic acid metabolism	2/220	0.999638	LOC_Os03g12890/LOC_Os04g32010
osa01040	Biosynthesis of unsaturated fatty acids	1/220	0.999638	LOC_Os03g53010
osa00020	Citrate cycle (TCA cycle)	2/220	0.999638	LOC_Os11g47120/LOC_Os03g15050
osa00052	Galactose metabolism	2/220	0.999638	LOC_Os06g46340/LOC_Os09g15420
osa00900	Terpenoid backbone biosynthesis	2/220	0.999638	LOC_Os07g09190/LOC_Os12g01480
osa00565	Ether lipid metabolism	1/220	0.999638	LOC_Os05g07880
osa00906	Carotenoid biosynthesis	1/220	0.999638	LOC_Os01g54270
osa00513	Various types of N-glycan biosynthesis	1/220	0.999638	LOC_Os02g55470
osa00220	Arginine biosynthesis	1/220	0.999638	LOC_Os02g50240
osa00640	Propanoate metabolism	1/220	0.999638	LOC_Os02g01510
osa03430	Mismatch repair	1/220	0.999638	LOC_Os01g56940
osa00510	N-Glycan biosynthesis	1/220	0.999638	LOC_Os02g55470
osa04130	SNARE interactions in vesicular transport	1/220	0.999638	LOC_Os06g07200
osa03410	Base excision repair	1/220	0.999638	LOC_Os08g38170
osa04146	Peroxisome	2/220	0.999638	LOC_Os07g30600/LOC_Os08g45210
osa03060	Protein export	1/220	0.999638	LOC_Os06g10990
osa00240	Pyrimidine metabolism	1/220	0.999638	LOC_Os01g51540
osa00051	Fructose and mannose metabolism	1/220	0.999638	LOC_Os11g38810
osa00190	Oxidative phosphorylation	3/220	0.999638	LOC_Os02g47600/LOC_Os07g09340/LOC_Os05g02310
osa03440	Homologous recombination	1/220	0.999638	LOC_Os03g06920
osa00710	Carbon fixation in photosynthetic organisms	1/220	0.999638	LOC_Os03g15050
osa01200	Carbon metabolism	7/220	0.999638	LOC_Os03g60090/LOC_Os06g05700/LOC_Os11g12290/LOC_Os03g08999/LOC_Os11g26860/LOC_Os03g15050/LOC_Os01g47080
osa00195	Photosynthesis	1/220	0.999638	LOC_Os09g04680
osa04145	Phagosome	1/220	0.999638	LOC_Os08g01390
osa03008	Ribosome biogenesis in eukaryotes	1/220	0.999638	LOC_Os10g07974
osa04120	Ubiquitin mediated proteolysis	2/220	0.999638	LOC_Os05g48390/LOC_Os05g42424
osa03018	RNA degradation	1/220	0.999638	LOC_Os04g58810
osa03015	mRNA surveillance pathway	1/220	0.999638	LOC_Os03g19920
osa04144	Endocytosis	2/220	0.999638	LOC_Os05g07880/LOC_Os03g47560
osa03013	RNA transport	2/220	0.999638	LOC_Os07g48602/LOC_Os10g07974
osa04141	Protein processing in endoplasmic reticulum	2/220	0.999638	LOC_Os06g10990/LOC_Os02g42690
