# Supplementary material for: ThSCSP_12: Novel Effector in Tilletia horrida That Induces Cell Death and Defense Responses in Non-Host Plants
Source: Int J Mol Sci. 2022 Nov 25;23(23):14752. doi: 10.3390/ijms232314752 (PMC9736266; doi:10.3390/ijms232314752)
Supplement: Supplementary file 1 [file ijms-23-14752-s001.zip › Supplementary Table S5.xlsx]

## Sheet: Sheet1
Supplementary Table S5 The primers sequences used in this study.
Primer name	Primer sequence(5'-3')	Purpose
ThSCSP_12-F	gacctcgactctagaggatccATGAAGGCCTTCACCACTGCT	PCR amplification
ThSCSP_12-R	gtccttgtagtcagaaggcctCTAGTGGTGGCCGAACCAGG
ThSCSP_12-SP-F	cggaattttaattaagaattcATGAAGGCCTTCACCACTGCT
ThSCSP_12-SP-R	cactatagggagaacctcgagGGCCGAGACGGCGGCGGT
ThSCSP_12SP-F	gacctcgactctagaggatccATGGCTACCTGCCAGCCC
ThSCSP_12SP-R	gtccttgtagtcagaaggcctCTAGTGGTGGCCGAACCAGG
ThSCSP_12PHB-F	accagtctctctctcaagcttATGGCTACCTGCCAGCCC
ThSCSP_12PHB-R	gctcaccatactagtggatccCTAGTGGTGGCCGAACCAGG
ThSCSP_12-223-F	gacctcgactctagaggatccATGAAGGCCTTCACCACTGCT
ThSCSP_12-223-R	gtccttgtagtcagaaggcctCTAAGCCTTGGACCAGAGAGAGC
ThSCSP_12-206-F	gacctcgactctagaggatccATGAAGGCCTTCACCACTGCT
ThSCSP_12-206-R	gtccttgtagtcagaaggcctCTAAGTGCTGGTGGGCTTGG
ThSCSP_12-189-F	gacctcgactctagaggatccATGAAGGCCTTCACCACTGCT
ThSCSP_12-189-R	gtccttgtagtcagaaggcctCTAGGTGGCCGACTTGGTGG
ThSCSP_12-156-F	gacctcgactctagaggatccATGAAGGCCTTCACCACTGCT
ThSCSP_12-156-R	gtccttgtagtcagaaggcctCTACCGGGAGTGCCGGGG
UBQ-F	ACCACTTCGACCGCCACTACT	qRT-PCR
UBQ-R	ACGCCTAAGCCTGCTGGTT
ThSCSP_12-qRT-PCR-F	TCTCCTTCGGCGGTCTCCTTAAC
ThSCSP_12-qRT-PCR-R	GTCGGTACGGCGGAAGATGTTG
Nb-Actin-qRT-PCR-F	TGGCATCTCTCAGCACATTCC
Nb-Actin-qRT-PCR-R	TGCACAATGGATGGGCCAGA
Nb-ERF1-qRT-PCR-F	GCTCTTAACGTCGGATGGTC
Nb-ERF2-qRT-PCR-R	AGCCAAACCCTAGCTCCATT
Nb-LOX-qRT-PCR-F	AAAACCTATGCCTCAAGAAC
Nb-LOX-qRT-PCR-R	ACTGCTGCATAGGCTTTGG
Nb-RbohB-qRT-PCR-F	TCACAAGAGCTCAGGCGTTT
Nb-RbohB-qRT-PCR-R	TCATCGAACCGCTTCTCGAC
Nb-PR2b-qRT-PCR-F	AGGTGTTTGCTATGGAATGC
Nb-PR2b-qRT-PCR-R	TCTGTACCCACCATCTTGC
Nb-PR4a-qRT-PCR-F	CAACCCACAGAACATTAACTGG
Nb-PR4a-qRT-PCR-R	TTGTCGGCATCCCAAGTAGT
Nb-SGT1-qRT-PCR-F	GAGGTGGTGGTGACTATA
Nb-SGT1-qRT-PCR-R	CACATCAATGCTAACACTAAG
Nb-Hsp90-qRT-PCR-F	AACGATAAGTCTGTCAAG
Nb-Hsp90-qRT-PCR-R	CAATCCTCATCAATACTCA
Nb-RAR1-qRT-PCR-F	GATGAAGAAGTGGAGTTG
Nb-RAR1-qRT-PCR-R	TACATTGGTCGTAGAAGT
Nb-SERK3-qRT-PCR-F	GCGAATGATGATGATGTC
Nb-SERK3-qRT-PCR-R	GTTCCACCTCTTCTTCTT
OsPR1a-qRT-PCR-F	GGCCAATCTCCCTACTGATTAA
OsPR1a-qRT-PCR-R	GCATAAACACGTAGCATAGCAT
OsPR1b-qRT-PCR-F	AGTTATTTATACACACGGGCGT
OsPR1b-qRT-PCR-R	GGATCAGACACTGACCTGTTTA
OsPR10a-qRT-PCR-F	CAGTGGTCAGTAGAGTGATCAG
OsPR10a-qRT-PCR-R	GGGTTAAGCTTCATGGTGTAGA
OsCATA-qRT-PCR-F	GCCAAGCATGTGAAGAAACTAA
OsCATA-qRT-PCR-R	TCTGACATTGTCTGGCCTTATT
OsAOS2-qRT-PCR-F	CAATACGTGTACTGGTCGAATG
OsAOS2-qRT-PCR-R	CTTATTGCATATGCGTAGGACG
OsAOC-qRT-PCR-F	CTCAACAACTTCACCAACTAGC
OsAOC-qRT-PCR-R	TTGGCAGAGTAGTAACAGTAGC
OsACS2-qRT-PCR-F	GCCTTACTACGTCGACTACATT
OsACS2-qRT-PCR-R	TAGCCTAGTTTCCACAAACGAT
OsPAL1-qRT-PCR-F	GACCCTGTATTTTCTTCGTTCG
OsPAL1-qRT-PCR-R	AGTAGCAATACTTTCACCCCAA
Os-actin-qRT-PCR-F	CACATTCCAGCAGATGTGGA
Os-actin-qRT-PCR-R	ACCACAGGTAGCAATAGGTA
